# Supplementary material for: Validation of the Transition Readiness and Appropriateness Measure (TRAM) for the Managing the Link and Strengthening Transition from Child to Adult Mental Healthcare in Europe (MILESTONE) study
Source: PubMed Central journal article supplement — BMJ Open. 2020 Jun 23;10(6):e033324. doi: 10.1136/bmjopen-2019-033324 (PMC7312331; doi:10.1136/bmjopen-2019-033324), 2020-06-23
Supplement: bmjopen-2019-033324.draft_revisions.pdf [file bmjopen-2019-033324.draft_revisions.pdf]

# BMJ Open

BMJ Open is committed to open peer review. As part of this commitment we make the peer review history of every article we publish publicly available.

When an article is published we post the peer reviewers' comments and the authors' responses online. We also post the versions of the paper that were used during peer review. These are the versions that the peer review comments apply to.

The versions of the paper that follow are the versions that were submitted during the peer review process. They are not the versions of record or the final published versions. They should not be cited or distributed as the published version of this manuscript.

BMJ Open is an open access journal and the full, final, typeset and author-corrected version of record of the manuscript is available on our site with no access controls, subscription charges or pay-per-view fees (<http://bmjopen.bmj.com>).

If you have any questions on BMJ Open's open peer review process please email [info.bmjopen@bmj.com](mailto:info.bmjopen@bmj.com)

# BMJ Open

## Validation of the Transition Readiness and Appropriateness Measure (TRAM) for the Managing the Link and Strengthening Transition from Child to Adult Mental Health Care (MILESTONE) study

|                               |                                                                                                                                                                                                                                                                                                                                                                                                                                                                                                                                                                                                                                                                                                                                                                                                                                                                                                                                                                                                                                                                                                                                                                                                                                                                                                                                                                                                                                                                                                                                                                                                                                                                                                                                                                                                                                                                                                                                                                                                                                                                                                                                                                                               |
|-------------------------------|-----------------------------------------------------------------------------------------------------------------------------------------------------------------------------------------------------------------------------------------------------------------------------------------------------------------------------------------------------------------------------------------------------------------------------------------------------------------------------------------------------------------------------------------------------------------------------------------------------------------------------------------------------------------------------------------------------------------------------------------------------------------------------------------------------------------------------------------------------------------------------------------------------------------------------------------------------------------------------------------------------------------------------------------------------------------------------------------------------------------------------------------------------------------------------------------------------------------------------------------------------------------------------------------------------------------------------------------------------------------------------------------------------------------------------------------------------------------------------------------------------------------------------------------------------------------------------------------------------------------------------------------------------------------------------------------------------------------------------------------------------------------------------------------------------------------------------------------------------------------------------------------------------------------------------------------------------------------------------------------------------------------------------------------------------------------------------------------------------------------------------------------------------------------------------------------------|
| Journal:                      | <i>BMJ Open</i>                                                                                                                                                                                                                                                                                                                                                                                                                                                                                                                                                                                                                                                                                                                                                                                                                                                                                                                                                                                                                                                                                                                                                                                                                                                                                                                                                                                                                                                                                                                                                                                                                                                                                                                                                                                                                                                                                                                                                                                                                                                                                                                                                                               |
| Manuscript ID                 | bmjopen-2019-033324                                                                                                                                                                                                                                                                                                                                                                                                                                                                                                                                                                                                                                                                                                                                                                                                                                                                                                                                                                                                                                                                                                                                                                                                                                                                                                                                                                                                                                                                                                                                                                                                                                                                                                                                                                                                                                                                                                                                                                                                                                                                                                                                                                           |
| Article Type:                 | Research                                                                                                                                                                                                                                                                                                                                                                                                                                                                                                                                                                                                                                                                                                                                                                                                                                                                                                                                                                                                                                                                                                                                                                                                                                                                                                                                                                                                                                                                                                                                                                                                                                                                                                                                                                                                                                                                                                                                                                                                                                                                                                                                                                                      |
| Date Submitted by the Author: | 30-Jul-2019                                                                                                                                                                                                                                                                                                                                                                                                                                                                                                                                                                                                                                                                                                                                                                                                                                                                                                                                                                                                                                                                                                                                                                                                                                                                                                                                                                                                                                                                                                                                                                                                                                                                                                                                                                                                                                                                                                                                                                                                                                                                                                                                                                                   |
| Complete List of Authors:     | <p>Santosh, Paramala; King's College London , Child and Adolescent Psychiatry</p> <p>Singh, Jatinder; Institute of Psychiatry, Psychology &amp; Neuroscience, Department of Child and Adolescent Psychiatry</p> <p>Adams, Laura; University of Plymouth, School of Psychology</p> <p>Mastroianni, Mathilde; King's College London , Child and Adolescent Psychiatry</p> <p>Heaney, Natalie; King's College London , Child and Adolescent Psychiatry</p> <p>Lievesley, Kate; HealthTracker</p> <p>Sagar-Ouriaghli, Ilyas; King's College London , Child and Adolescent Psychiatry</p> <p>Allibrio, Giovanni; ASST Spedali Civili di Brescia Dipartimento di Salute Mentale, Unit of Neuropsychiatry</p> <p>Appleton, Rebecca; University of Warwick, Warwick Medical School</p> <p>Davidović, Nikolina; Department of Psychiatry, Clinical Hospital Center Split,</p> <p>De Girolamo, Giovanni; Saint John of God Clinical Research Center, Brescia, Italy, Psychiatric Epidemiology and Evaluation Unit</p> <p>Dieleman, Gwen; Erasmus MC, Department of Child and Adolescent Psychiatry and Psychology</p> <p>Dodig-Ćurković, Katarina; KBC Osijek, Department of Pediatric and Adolescent Psychiatry</p> <p>Franić, Tomislav; Department of Psychiatry, Clinical Hospital Center Split</p> <p>Gatherer, Charlotte; University of Warwick, Warwick Medical School</p> <p>Gerritsen, Suzanne; Erasmus MC, Department of Child and Adolescent Psychiatry and Psychology</p> <p>Gheza, Elisa; ASST della Valcamonica, Mental Health Department</p> <p>Madan, Jason; University of Warwick, Warwick Medical School</p> <p>Manenti, Lidia; ASST Spedali Civili di Brescia Dipartimento di Salute Mentale, Unit of Neuropsychiatry</p> <p>Maras, Athanasios; Yulius Academy, Rotterdam, Netherlands; Department of Child and Adolescent Psychiatry and Psychology, Erasmus Medical Center, Rotterdam, Netherlands</p> <p>Margari, Francesco; University of Bari, Department of Basic Medical Sciences, Neuroscience and Sense Organs</p> <p>McNicholas, Fiona; University College Dublin School of Medicine and Medical Science, SMMS; Our Lady's Hospital For Sick Children, Child Psychiatry</p> |

|           |                                                                                                                                                                                                                                                                                                                                                                                                                                                                                                                                                                                                                                                                                                                                                                                                                                                                                                                                                                                                                                                                                                                                                                                                                                                                                                                                                                                                                                                                                                                                                                                                                                                                                              |
|-----------|----------------------------------------------------------------------------------------------------------------------------------------------------------------------------------------------------------------------------------------------------------------------------------------------------------------------------------------------------------------------------------------------------------------------------------------------------------------------------------------------------------------------------------------------------------------------------------------------------------------------------------------------------------------------------------------------------------------------------------------------------------------------------------------------------------------------------------------------------------------------------------------------------------------------------------------------------------------------------------------------------------------------------------------------------------------------------------------------------------------------------------------------------------------------------------------------------------------------------------------------------------------------------------------------------------------------------------------------------------------------------------------------------------------------------------------------------------------------------------------------------------------------------------------------------------------------------------------------------------------------------------------------------------------------------------------------|
|           | <p>Pastore, Adriana; University of Bari, Department of Basic Medical Sciences, Neuroscience and Sense Organs</p> <p>Paul, Moli; Coventry and Warwickshire Partnership NHS Trust; University of Warwick, Warwick Medical School</p> <p>Purper-Ouakil, Diane; Centre Hospitalier Regional Universitaire de Montpellier</p> <p>Rinaldi, Francesco; ASST della Valcamonica, Mental Health Department</p> <p>Sakar, Vehbi; Universitätsklinikum Ulm</p> <p>Schulze, Ulrike; Universitätsklinikum Ulm</p> <p>Signorini, Giulia; Psychiatric Epidemiology and Evaluation Unit, Saint John of God Clinical Research Center, Brescia, Italy</p> <p>Street, Cathy; University of Warwick, Warwick Medical School</p> <p>Tah, Priya ; University of Warwick, Warwick Medical School</p> <p>Tremmery, Sabine; Katholieke Universiteit Leuven, Department of Neurosciences, Child &amp; Adolescent Psychiatry</p> <p>Tuffrey, Amanda; University of Warwick, Warwick Medical School</p> <p>Tuomainen, Helena; University of Warwick, Warwick Medical School</p> <p>Verhulst, Frank; Department of Child and Adolescent Psychiatry and Psychology, Erasmus Medical Center, Rotterdam, Netherlands</p> <p>Warwick, Jane; University of Warwick Warwick Medical School, Warwick Clinical Trials Unit</p> <p>Wilson, Anna; University of Warwick, Warwick Medical School</p> <p>Wolke, Dieter; University of Warwick, Department of Psychology and Division of Mental Health and Wellbeing</p> <p>Fiori, Federico; Institute of Psychiatry, Psychology &amp; Neuroscience, Department of Child and Adolescent Psychiatry</p> <p>Singh, Swaran; Warwick Medical School, Health Sciences Research Institute</p> |
| Keywords: | <p>Transition Readiness and Appropriateness Measure (TRAM), Validation, Child and Adolescent Mental Health Services, Adult Mental Health Services, Young Persons</p>                                                                                                                                                                                                                                                                                                                                                                                                                                                                                                                                                                                                                                                                                                                                                                                                                                                                                                                                                                                                                                                                                                                                                                                                                                                                                                                                                                                                                                                                                                                         |
|           |                                                                                                                                                                                                                                                                                                                                                                                                                                                                                                                                                                                                                                                                                                                                                                                                                                                                                                                                                                                                                                                                                                                                                                                                                                                                                                                                                                                                                                                                                                                                                                                                                                                                                              |

SCHOLARONE™  
Manuscripts

1  
2  
3  
4  
5  
6  
7  
8  
9  
10  
11  
12  
13  
14  
15  
16  
17  
18  
19  
20  
21  
22  
23  
24  
25  
26  
27  
28  
29  
30  
31  
32  
33  
34  
35  
36  
37  
38  
39  
40  
41  
42  
43  
44  
45  
46  
47  
48  
49  
50  
51  
52  
53  
54  
55  
56  
57  
58  
59  
60

# Validation of the Transition Readiness and Appropriateness Measure (TRAM) for the Managing the Link and Strengthening Transition from Child to Adult Mental Health Care (MILESTONE) study

Santosh P<sup>1,2,3</sup>, Singh J<sup>1,2</sup>, Adams L<sup>4</sup>, Mastroianni M<sup>1</sup>, Heaney N<sup>1</sup>, Lievesley K<sup>3</sup>, Sagar-Ouriaghli I<sup>1</sup>, Allibrio G<sup>5</sup>, Appleton R<sup>6</sup>, Davidovic N<sup>7</sup>, de Girolamo G<sup>8</sup>, Dieleman GC<sup>9</sup>, Dodig Curkovic K<sup>10</sup>, Franić T<sup>7</sup>, Gatherer C<sup>6</sup>, Gerritsen S<sup>9</sup>, Gheza E<sup>11</sup>, Madan J<sup>12</sup>, Manenti L<sup>5</sup>, Maras A<sup>9,13</sup>, Margari F<sup>14</sup>, McNicholas F<sup>15,16,17,18</sup>, Pastore A<sup>14</sup>, Paul M<sup>6,19</sup>, Purper-Ouakil D<sup>20</sup>, Rinaldi F<sup>11</sup>, Sakar V<sup>21</sup>, Schulze UME<sup>21</sup>, Signorini G<sup>8</sup>, Street C<sup>6</sup>, Tah P<sup>6</sup>, Tremmery S<sup>22,23</sup>, Tuffrey A<sup>6</sup>, Tuomainen H<sup>6</sup>, Verhulst FC<sup>9</sup>, Warwick J<sup>12</sup>, Wilson A<sup>6</sup>, Wolke D<sup>6,24</sup>, Fiori F<sup>1,2,3</sup>, Singh S P<sup>6,19</sup>  
for the MILESTONE Consortium

## Affiliations:

<sup>1</sup>Department of Child and Adolescent Psychiatry, King's College London, London, UK.

<sup>2</sup>Centre for Interventional Paediatric Psychopharmacology and Rare Diseases, South London and Maudsley NHS Foundation Trust, London, UK.

<sup>3</sup>HealthTracker Ltd, Gillingham, Kent, United Kingdom.

<sup>4</sup>School of Psychology, Plymouth University, UK.

<sup>5</sup>Unit of Neuropsychiatry, ASST Spedali Civili, Brescia, Italy

<sup>6</sup>Mental Health and Wellbeing, Warwick Medical School, University of Warwick, Coventry, UK.

<sup>7</sup>Department of Psychiatry, Clinical Hospital Center Split, Split, Croatia.

<sup>8</sup>IRCCS Istituto Centro San Giovanni di Dio Fatebenefratelli, Brescia, Italy.

<sup>9</sup>Department of Child and Adolescent Psychiatry and Psychology, Erasmus Medical Center, Rotterdam, The Netherlands.

<sup>10</sup>Institute for Child and Adolescent Psychiatry, University Health Center Osijek, Croatia

<sup>11</sup>Neuropsychiatry Service of Childhood and Adolescence, Mental Health Department, ASST Valcamonica Esine, Brescia, Italy

<sup>12</sup>Warwick Clinical Trials Unit, Warwick Medical School, Warwick Medical School, Coventry, UK.

<sup>13</sup>Yulius Academy, Rotterdam, The Netherlands.

<sup>14</sup>Department of Basic Medical Sciences, Neuroscience and Sense Organs, University of Bari, Italy

1  
2  
3 <sup>15</sup>Department of Child and Adolescent Psychiatry, University College Dublin School of Medicine and Medical  
4 Science, Dublin, Republic of Ireland.

5  
6 <sup>16</sup>Geary Institute, University College Dublin, Dublin, Republic of Ireland.

7  
8 <sup>17</sup>Department of Child Psychiatry, Our Lady's Hospital for Sick Children, Dublin, Republic of Ireland.

9  
10 <sup>18</sup>Lucena Clinic, SJOG, Dublin, Republic of Ireland.

11  
12 <sup>19</sup>Coventry and Warwickshire Partnership NHS Trust, UK.

13  
14 <sup>20</sup>CHU Montpellier / University of Montpellier; Saint Eloi Hospital; Médecine Psychologique de l'enfant et de  
15 adolescent (MPEA1); Montpellier, France.

16  
17 <sup>21</sup>Department of Child and Adolescent Psychiatry/Psychotherapy, University of Ulm, Ulm, Germany.

18  
19 <sup>22</sup>Department of Neurosciences, Child & Adolescent Psychiatry, University of Leuven, Leuven, Belgium.

20  
21 <sup>23</sup>Department of Child & Adolescent Psychiatry, University Hospitals Leuven, Leuven, Belgium.

22  
23 <sup>24</sup>Department of Psychology, University of Warwick, Coventry, UK.

### 24 25 **Corresponding author:**

26  
27 Professor Paramala Santosh,

28  
29 Centre for Interventional Paediatric Psychopharmacology and Rare Diseases (CIPPRD)

30  
31 Research Team,

32  
33 4 Windsor Walk, Denmark Hill,

34  
35 London SE5 8BB,

36  
37 United Kingdom

38  
39 E-mail: [paramala.1.santosh@kcl.ac.uk](mailto:paramala.1.santosh@kcl.ac.uk)

### 40 41 42 **Key Words**

43  
44 Transition Readiness and Appropriateness Measure (TRAM); Validation; Child and  
45  
46 Adolescent Mental Health Services; Adult Mental Health Services; Young Persons  
47  
48  
49  
50  
51  
52  
53  
54  
55  
56  
57  
58  
59  
60

## Abstract

**Objective:** Young people moving from child and adolescent mental health services (CAMHS) to adult mental health services (AMHS) are faced with significant challenges. To improve this state of affairs not only does there need to be a recognition of the problem and initiatives but an urgent requirement for appropriate tools for measuring readiness and outcomes at the transition boundary. The objective of this study was to develop and validate the Transition Readiness and Appropriateness Measure (TRAM) for assessing a young person's readiness for transition, and their outcomes at the transition boundary.

**Design:** MILESTONE cohort study and nested cluster randomised trial.

**Setting:** Eight European Union countries participating in the European Union (EU) funded Managing the Link and Strengthening Transition from Child to Adult Mental Health Care (MILESTONE) study.

**Participants:** The first phase (MILESTONE validation study) involved 100 adolescents (pre-transition), young adults (post-transition), parents/carers and both CAMHS and AMHS clinicians. The second phase (MILESTONE cohort study and nested cluster randomised trial) involved over 1000 young people.

**Results:** The development of the TRAM began with a literature review on transitioning and a review of important items regarding transition by a panel of 34 mental health experts. A list of 64 items of potential importance were identified, which together comprised the TRAM. The psychometric properties of the different versions of the TRAM were evaluated and showed that the TRAM had good reliability for all versions and low to moderate correlations when compared with other established instruments and a well-defined factor structure.

**Conclusion:** The TRAM is a reliable instrument for assessing transition. It highlighted the barriers to a successful transition and informed clinicians, identifying areas which clinicians

1  
2  
3 on both sides of the transition boundary can work on to ease the transition for the young  
4  
5 person.  
6  
7  
8  
9  
10  
11  
12  
13  
14  
15  
16  
17  
18  
19  
20  
21  
22  
23  
24  
25  
26  
27  
28  
29  
30  
31  
32  
33  
34  
35  
36  
37  
38  
39  
40  
41  
42  
43  
44  
45  
46  
47  
48  
49  
50  
51  
52  
53  
54  
55  
56  
57  
58  
59  
60

For peer review only

### Strengths and limitations of this study

- The European Union (EU) funded Managing the Link and Strengthening Transition from Child to Adult Mental Health Care (MILESTONE) study provides a useful model to evaluate the readiness of transition for young people.
- MILESTONE study allowed the TRAM to be holistic in its scope because it ensured that all the essential information to assist with transition from CAMHS to AMHS was captured in its entirety especially given the fact that the transition journey for young people is very difficult and often poorly managed.
- The focus groups gathered extensive input from young people, their family members and mental health professionals with experience in transition within mental health.
- The web-based aspect of the TRAM allowed it to be completed remotely using developmentally appropriate interfaces, which aided in its completion.
- Transition is not static and further evaluation of the TRAM is warranted in young people to assess transition readiness longitudinally.



## Introduction

Ensuring a smooth transition process from paediatric to adult healthcare services has been a significant challenge for healthcare providers in recent years. Young people with chronic somatic conditions usually undergo a review when they reach the service transition boundary<sup>1</sup>; however, in the mental healthcare setting an assessment of transition readiness and appropriateness of young people has not been well developed. Transition in mental health services refers to the process of young people moving from child and adolescent mental health services (CAMHS) to adult mental health services (AMHS). Despite recommendations – e.g. by the Department of Health<sup>2</sup> and the National Institute for Health and Care Excellence (NICE)<sup>3</sup> in the U.K. – to improve the process, transition across the CAMHS - AMHS boundary has received less research attention than transitions in other healthcare settings, such as for young people with chronic conditions<sup>4-7</sup> or special healthcare needs<sup>8</sup>.

Transition in the mental health setting requires a multidimensional approach that covers a young person's psychosocial, educational and vocational needs. Various assessments of improving transition outcomes have been developed<sup>9-16</sup>. Some explore the readiness for transition, such as treatment engagement, medication use and housing<sup>10</sup>, while others have focused specifically on the readiness for transition<sup>12</sup> or assessing the quality of interaction in service user/practitioner relationships<sup>13</sup>. The current evidence base does not suggest that one measure of transition might be more efficacious than another, however, in the mental healthcare setting it seems that certain components might be more useful than others. The Transitions of Care from Child and Adolescent Mental Health Services to Adult Mental Health Services (TRACK study)<sup>17,18</sup> noted that youth reaching the CAMHS transition boundary have variable outcomes, including inadequate transition procedures and disengagement from services. These factors can have a significant health economic impact on young people and their families<sup>19</sup>.

1  
2  
3 Others have shown that transition should be both personalised and flexible, and crucially  
4 incorporate the perspectives of young people<sup>20</sup>.  
5  
6

7  
8 A recent mapping survey revealed a lack of CAMHS to AMHS transition services in 50% of  
9 the European Union countries evaluated; policies relating to the management of transition were  
10 only available in four of the 28 countries<sup>21</sup>. This implies that not enough resources and funds  
11 have been allocated to prevent discontinuity of care at the transition boundary and that  
12 disengagement from services may be a significant problem across the continent. Furthermore,  
13 whilst new national and international initiatives are clearly warranted, tools to inform decision-  
14 making at the transition boundary and to enable reliable and consistent assessment of transition  
15 outcomes are also urgently needed. It is for this reason that a bespoke suite of measures,  
16 focusing on transition of young people from CAMHS to AHMS, was developed within the  
17 European Union (EU) funded Managing the Link and Strengthening Transition from Child to  
18 Adult Mental Health Care (MILESTONE) study<sup>22</sup>. The MILESTONE suite of measures  
19 comprises the Transition Readiness and Appropriateness Measure (TRAM), for assessing  
20 whether transition is appropriate and whether the young person is ready for it, and the  
21 Transition Related Outcome Measure (TROM), which evaluates the outcomes of transition.  
22 The TRAM is currently being used within the MILESTONE cluster randomised controlled trial  
23 as one of the components of the MILESTONE study<sup>22</sup> to inform “Managed transition” in the  
24 intervention arm. The present paper presents the findings on the validation of the TRAM.  
25 Validation of the outcomes of the TROM will be described in detail in subsequent publications.  
26  
27  
28  
29  
30  
31  
32  
33  
34  
35  
36  
37  
38  
39  
40  
41  
42  
43  
44  
45  
46  
47  
48  
49  
50  
51  
52  
53  
54  
55  
56  
57  
58  
59  
60

## Methods

The methods linked with the development and validation of the TRAM (and TROM) have been described previously<sup>23</sup>. Figure 1 summarises the main stages, methods and analyses; only the key points are mentioned here. The US FDA Guidance for Patient-reported Outcome Measures (PROM) was followed<sup>24</sup>. The development of the TRAM (and TROM) began with a literature review on transitioning and an expert panel review. A focus group phase followed, after which the measures were developed and translated so that the testing of the web-based versions could take place in the eight European Union countries participating in the MILESTONE study<sup>22</sup>. A two-phase process was followed: The first phase (MILESTONE validation study) involved 100 adolescents (pre-transition), young adults (post-transition), parents/carers and both CAMHS and AMHS clinicians and assessed content validity, construct validity and test-retest reliability. Participants completed the TRAM plus other validated measures (Figure 1). The second phase (MILESTONE cohort study and nested cluster randomised trial) involved over 1000 young people and assessed the responsiveness and interpretability of the TRAM and the psychometric properties (apart from test-retest). All study participants gave informed consent as per study guidelines. The MILESTONE study protocol was approved by the UK National Research Ethics Service (15/WM/0052). Ethics approval was also granted by the ethics boards in the different MILESTONE participating centres. Data collection was part of the MILESTONE study, which has been described elsewhere<sup>22</sup>.

Internal consistency of the TRAM was calculated by means of the Cronbach's alpha. The Pearson's product moment correlation between the 'standard scales' and the new rating scales was calculated to assess whether the scores of the TRAM are related to scores on other instruments. Factor analysis was conducted to determine the underlying structure of the TRAM subscales and to identify patterns and characteristics of the factors. Results of the second phase

1  
2  
3 of validation will also be used to inform modifications to the scale, in particular to improve the  
4  
5 utility and accessibility of the measure and minimise completion burden.  
6  
7  
8  
9  
10  
11  
12  
13  
14  
15  
16  
17  
18  
19  
20  
21  
22  
23  
24  
25  
26  
27  
28  
29  
30  
31  
32  
33  
34  
35  
36  
37  
38  
39  
40  
41  
42  
43  
44  
45  
46  
47  
48  
49  
50  
51  
52  
53  
54  
55  
56  
57  
58  
59  
60

For peer review only

## Results

### *Literature review*

The detailed review of current literature and measures on transition in both mental and physical health resulted in a list of 64 items of potential importance, grouped into three main domains - diagnosis, risk and functioning - forming the core structure of the TRAM.

### *Expert panel*

It was decided that the TRAM should include questions on potential barriers to a successful transition (e.g. young people not being able to act independently, not being motivated to manage their conditions or not understanding their conditions), as these reflect the young persons' readiness for and functioning related to transition. Furthermore, it was hoped that addressing such issues within the TRAM would emphasise the need for CAMHS and AMHS to work together before and/or during transition. The TRAM also considered the young person's desired level of parental involvement, the ease with which they formed clinical relationships and whether they were able to discuss their mental health history. These elements were also deemed relevant for services to understand to avoid difficult or tricky situations that may potentially derail transition.

### *Focus groups*

Focus groups were held with young people with experience of CAMHS, parents and carers, CAMHS professionals and AMHS professionals. During the focus group discussions, young people voiced that 'life events' should be taken into account when deciding about transition. A large number of recent life events was thought to suggest a greater need for AMHS. Participants in the focus groups also identified the level of external support as being an important consideration when making transition plans, as those with less external support may have a greater need for continued statutory services. Young people, parents and CAMHS clinicians ranked social support and housing as important more often than the expert panel or AMHS

1  
2  
3 clinicians. Poor engagement with tasks, lack of meaningful occupation and cognitive factors  
4  
5 were considered the least important factors to consider when making a transition decision by  
6  
7 all categories of participants. Questions relating to these issues were therefore removed from  
8  
9 subsequent versions of the scale.  
10

### 11 ***Organisation of items within subscales***

12  
13  
14 Once the final list of items had been decided, the organisation of these items was discussed  
15  
16 with further focus groups and the MILESTONE expert panel. Based on this feedback, the  
17  
18 preliminary version of the TRAM included domains A-F, which capture the ‘appropriateness’  
19  
20 of transition, and G and H, which capture ‘readiness’ for transition, as follows:  
21  
22

#### 23 (A) Symptoms

24  
25 Frequency and severity of symptoms to include: depression, mania, anxiety, post-traumatic  
26  
27 stress, psychosis, personality disorder, antisocial personality disorder, attention deficit, social  
28  
29 communication, eating difficulties and other mental health conditions.  
30  
31

#### 32 (B) Overall illness

33  
34 This considered severity, taking into account all symptoms across all existing conditions.  
35  
36

#### 37 (C) Overall disruption

38  
39 Effect of symptoms on functioning with respect to self-care, sleep, household chores,  
40  
41 community, social, responsibility, relationships with family, friends/partner, peers/colleagues  
42  
43 and education/work performance.  
44  
45

#### 46 (D) Risk factors

47  
48 Frequency and severity of stress, risk taking behaviour, self-harm (no suicidal intent), suicidal  
49  
50 thoughts, behaviours that risk harm to others and behaviours that risk harm from others.  
51  
52

#### 53 (E) Factors affecting symptoms

54  
55 Including need for ongoing treatment, inpatient admissions, relapse, side effects to medication,  
56  
57 physical health comorbidities and drug and alcohol abuse.  
58  
59  
60

1  
2  
3 (F) Health system factors  
4

5 The health system factors that may affect a clinicians' transition decision include items such as  
6 financial implications of a transition to AMHS, the quality of the links between CAMHS and  
7 AMHS, the appropriateness of available statutory services, the availability of alternative  
8 services and the skills of local GPs with regard to mental health when treating a young person's  
9 condition.  
10  
11  
12  
13  
14  
15

16  
17 (G) Barriers to functioning  
18

19 Including inability to act independently, poor understanding of condition, lack of knowledge  
20 on how to access services, lack of motivation, poor adherence to medication, lack of social  
21 support, not wanting carers to be involved, difficulty forming relationships with treatment team  
22 and difficulty repeating mental health history.  
23  
24  
25  
26  
27

28  
29 (H) Other life changes  
30

31 Other life changes (positive or negative) relating to family relationships, relationships with  
32 friends and partner, moving home, school/college/work, illness/death, police involvement,  
33 pregnancy and other.  
34  
35  
36

37 Both the frequency of symptoms and the severity of impairment (A [symptoms] and D [risk  
38 factors]) were assessed, as advised by focus groups participants. Again, following participant  
39 feedback, the severity of each symptom was recorded separately but a single assessment of  
40 impairment was made across all symptoms and conditions. Focus group participants also  
41 considered which options for assessing frequency and severity would be most appropriate. For  
42 frequency, the most popular choice was a 6-point ordinal scale (from not experienced in the  
43 past 6 months ranging to all of the time) and for severity, a 5-point ordinal scale (from very  
44 mild ranging to very severe). Unduly convoluted medical language was removed, and  
45 participants reported no major issues with completion of the scale. Experts in the field were  
46 asked to review the proposed scale. The agreed test version was translated into Croatian, Dutch,  
47  
48  
49  
50  
51  
52  
53  
54  
55  
56  
57  
58  
59  
60

1  
2  
3 French, German, and Italian using a back-translation process<sup>25</sup> and, after final checks, uploaded  
4  
5 on the HealthTracker™ system, a web-based portal for online measures.  
6  
7  
8  
9  
10  
11  
12  
13  
14  
15  
16  
17  
18  
19  
20  
21  
22  
23  
24  
25  
26  
27  
28  
29  
30  
31  
32  
33  
34  
35  
36  
37  
38  
39  
40  
41  
42  
43  
44  
45  
46  
47  
48  
49  
50  
51  
52  
53  
54  
55  
56  
57  
58  
59  
60

For peer review only



## Validation of the TRAM

In the first phase, the TRAM was completed by a total of 36 adolescents (AD), 29 parents/carers (PC) and 35 clinicians (CL).

In the main MILESTONE study (second phase), the TRAM was completed by a total of 932 AD, 752 PC and 849 CL.

### *First Phase*

#### Test-retest Reliability

In order to assess test-retest reliability, Pearson's correlation coefficients were calculated between responses per the first and subsequent completion (a maximum of 41 days after the first assessment) for each sub-scale and version (AD, PC, CL) of TRAM. There were 36 AD, 29 PC and 35 CL completed TRAM's available for the test-retest reliability analysis. The results are summarised in Table 1 A and B. There was moderate ( $> 0.5$ ) correlation<sup>26</sup> between test-retest scores for all versions (AD, PC, CL) and all sub-scales.

### *Second Phase*

The following section describes the psychometric properties of the adolescent (AD), parent/carer (PC) and clinician (CL) versions of the TRAM and all sub-scales for the larger sample.

#### Internal Consistency (Reliability)

Cronbach's alpha was calculated for all versions of the TRAM (AD, PC, and CL versions) for the following sub-scales; Symptoms, Overall disruption, Barriers to functioning, Risk factors and Factors affecting symptoms. Alpha ( $\alpha \geq 0.70$ ) is considered acceptable evidence of internal reliability<sup>27</sup>. The consistency of responses between versions (AD, PC and CL) was assessed using Pearson's correlation coefficient. The internal consistency of the symptoms sub-scale was shown to be high for the AD version ( $\alpha = 0.804$ ), acceptable for the PC version ( $\alpha = 0.759$ ) and moderate for the CL version ( $\alpha = 0.552$ ). The AD version for symptoms moderately

1  
2  
3 correlated with the PC and CL version of the symptom sub-scale ( $r = 0.517, p < 0.01$  and  $r =$   
4  $0.396, p < 0.01$ , respectively). Additionally, the PC version and CL version of the symptom  
5 sub-scale also revealed a moderate correlation ( $r = 0.393, p < 0.01$ ). The overall disruption  
6 subscale demonstrated high levels of internal consistency for all versions of the scale (AD  
7 version,  $\alpha = 0.869$ ; PC version,  $\alpha = 0.882$ , CL version,  $\alpha = 0.877$ ). The AD version for overall  
8 disruptions correlated with the PC and CL version of the overall disruption sub-scale ( $r = 0.420,$   
9  $p < 0.01$  and  $r = 0.380, p < 0.01$ , respectively). Furthermore, the PC version and CL version of  
10 the overall disruption sub-scale also revealed a moderate correlation ( $r = 0.505, p < 0.01$ ).

11  
12 The barriers to functioning sub-scale scored adequate reliability for the PC and CL versions ( $\alpha$   
13  $= 0.725$  and  $0.714$ , respectively) with the AD version demonstrating slightly lower consistency  
14 ( $\alpha = 0.616$ ). The AD version for barriers to functioning sub-scale moderately correlated with  
15 the PC and CL version of the overall disruption sub-scale ( $r = 0.327, p < 0.01$  and  $r = 0.401, p$   
16  $< 0.01$ , respectively). Furthermore, the PC and CL version of the barriers to functioning sub-  
17 scale also revealed a moderate correlation ( $r = 0.380, p < 0.01$ ).

18  
19 The risk factors sub-scale achieved adequate levels of internal consistency for the AD version  
20 ( $\alpha = 0.735$ ), with the PC and CL versions revealing slightly lower consistency ( $\alpha = 0.654$  and  
21  $0.684$ , respectively). Once again, the AD version for risk moderately correlated with the PC  
22 and CL version of the risk sub-scale ( $r = 0.552, p < 0.01$  and  $r = 0.557, p < 0.01$ , respectively).  
23 Similarly, the PC version and CL version of the risk sub-scale also revealed a moderate  
24 correlation ( $r = 0.529, p < 0.01$ ).

25  
26 The factors affecting symptoms sub-scale did not exceed a Cronbach's alpha of 0.70 for all  
27 versions (AD version  $\alpha = 0.554$ , PC version  $\alpha = 0.565$ , CL version  $\alpha = 0.522$ ), with the AD  
28 version of the factors affecting symptoms sub-scale moderately correlating with the PC and CL  
29 version ( $r = 0.610, p < 0.01$  and  $r = 0.389, p < 0.01$ , respectively). This relationship was also  
30  
31  
32  
33  
34  
35  
36  
37  
38  
39  
40  
41  
42  
43  
44  
45  
46  
47  
48  
49  
50  
51  
52  
53  
54  
55  
56  
57  
58  
59  
60

1  
2  
3 seen for the PC and CL versions of the factors affecting symptoms sub-scale ( $r = 0.452, p <$   
4  
5 0.01).

6  
7  
8 The performance of the symptoms sub-scale for CL and the Factors Affecting Symptoms sub-  
9  
10 scale for AD, PC and CL, fell below the minimum acceptable threshold. We therefore explored  
11  
12 whether deletion of particular items might improve this and found that by removing the item  
13  
14 relating to “Attention deficit” from the CL Symptoms sub-scale, would increase to 0.587. We  
15  
16 also found that removing the item about “Medical comorbidity” from the Factors Affecting  
17  
18 Symptoms sub-scale (AD, PC, CL), reliability would increase to 0.573 for the AD, 0.593 for  
19  
20 the PC and 0.548 for the CL. Consequently, they were retained in the TRAM.  
21  
22

### 23 24 Correlations with other existing measures

25  
26 To assess whether the TRAM could conceptually overlap with other existing instruments also  
27  
28 completed by MILESTONE participants, the Pearson’s product moment correlation coefficient  
29  
30 was calculated between each TRAM subscale and the gold standard Health of the Nation  
31  
32 Outcome Scale for Children and Adolescents (HoNOSCA)<sup>28,29</sup> and the Clinical Global  
33  
34 Impression Severity (CGI-S) scale<sup>30</sup> (Table 2). The Pearson’s product moment correlation  
35  
36 coefficients for the TRAM sub-scales with HoNOSCA and CGI scales showed moderate  
37  
38 correlations. Apart from the CGI (clinician version) for the symptoms and overall disruption,  
39  
40 the correlation coefficients were all low ( $<.500$ ) suggesting a modest relationship between the  
41  
42 TRAM sub-scale and HoNOSCA and CGI-S scores.  
43  
44  
45

46  
47 Pearson’s correlations were also determined between each TRAM subscale and the parent  
48  
49 version of a behavioural rating scale: Specific Levels of Functioning (SLOF) scale. The SLOF  
50  
51 allows the capture of symptomatology using observable behavioural function in those with  
52  
53 psychiatric illness<sup>31</sup>. The subscale scores of the TRAM were analyzed to see how well they  
54  
55 correlate with the SLOF scale (AD, PC and CL) (Table 3). The Pearson’s correlation between  
56  
57 the TRAM sub-scales and SLOF Subscales showed moderate associations. However, while the  
58  
59  
60

1  
2  
3 HoNOSCA and CGI showed significant correlations with the TRAM scales, albeit moderate  
4 relationships, the SLOF scale revealed poor relationships (non-significant correlations)  
5  
6 between some constructs measured by the former two scales.  
7  
8

### 9 10 Exploratory Factor Analysis

11  
12 Exploratory factor analysis (EFA) (principal axis, Promax rotation) was undertaken to model  
13 the interrelationships between the items in the TRAM and was performed on the adolescent  
14 version of the TRAM's sub-scales. The TRAM was developed to assess whether transition is  
15 appropriate and whether the young person is ready for it. Based on this premise, the adolescent  
16 version of the scale was chosen as it was deemed to be the most relevant version clinically to  
17 explore the interrelationship between the items. The EFA showed that the number of factors  
18 were not set for the 'symptoms' and 'factors affecting symptoms' sub-scales, otherwise the  
19 number of factors were set to two ('overall disruption', 'risk factors' and 'barriers to  
20 functioning' sub-scales). Table 4 summarises the results of EFA for the TRAM subscales. The  
21 'symptoms', 'overall disruption', 'risk factors' and 'factors affecting' subscale revealed a two-  
22 factor model. The items were clustered based on clinical relevance. In comparison the 'barriers  
23 to functioning' subscale revealed a three factor model. The three factors were identified based  
24 on clinical knowledge of barriers that might impede functioning such as 'Patient Factors',  
25 'Family Support', and 'Treatment'.  
26  
27  
28  
29  
30  
31  
32  
33  
34  
35  
36  
37  
38  
39  
40  
41  
42  
43  
44  
45  
46  
47  
48  
49  
50  
51  
52  
53  
54  
55  
56  
57  
58  
59  
60

## Discussion

This current manuscript reports on the development and validation of the Transition Readiness and Appropriateness Measure (TRAM). The TRAM was designed and worded specifically so that it can be completed online, optimising both completion time and accessibility; thus, increasing its potential applicability in an adolescent/young adult population. The benefit of following the rigorous FDA process while developing TRAM was that feedback on potential items was gained early on from end users. Importantly, items such as diagnosis, risk and functioning were identified as important items in the transition decision-making process. The psychometric analyses revealed that the TRAM is a reliable and valid instrument for assessing transition. The TRAM had good reliability for all versions and showed moderate to low correlations when pitted with other established instruments. This finding supports the use of TRAM to assess transition readiness, as higher correlations would imply that the TRAM was not adding anything new when compared to existing measures such as HoNOSCA.

When looking more closely at the correlations of the TRAM, there were conceptual differences between the TRAM subscales and standard instruments. Regarding the HoNOSCA, the Pearson's correlations were all below .500 for the different versions suggesting a modest relationship between the HoNOSCA total score and TRAM subscale scores. Previous studies that have assessed the correlations between the HoNOSCA total score and other instruments such as the parent & clinician rated Children's Global Assessment Scale<sup>32</sup> and the Global Assessment of Psychosocial Disability<sup>33</sup> have reported moderate correlations ranging from of 0.4 to 0.6. The present study also reported modest correlations between the TRAM subscale and HoNOSCA total scores suggesting that conceptually the instruments measure different elements of transition. A similar reasoning can be put forward when examining the TRAMs performance with the CGI. The CGI considers aspects of three different global measures (i) severity of illness (CGI-S), (ii) global improvement and (iii) efficacy index<sup>30</sup>. In the context of

1  
2  
3 this study, the CGI-S was considered and embodies all the aspects regarding the overall severity  
4 of symptoms of the young person into a single score. In comparison, the TRAM sub-scales are  
5 more specific. The sub-scales of the SLOF make it conceptually closer to the TRAM in terms  
6 of looking at the functioning aspects of transition when compared to the HoNOSCA or CGI-I.  
7  
8 Although there was not a complete overlap, it was easier to classify individual correlations  
9 based on their meaningfulness. As expected, there were poor correlations (not significant) that  
10 can be explained by a conceptual difference between the construct measured by SLOF (that  
11 does not specifically focus on transition readiness) and TRAM sub-scales.  
12

13  
14 From a clinical viewpoint, the EFA for the adolescent version showed that a two factors model  
15 was the most suitable for the ‘symptoms’, ‘overall disruption’, ‘risk factors’ and ‘factors  
16 affecting symptoms’ TRAM subscale. The items were grouped together based on clinical  
17 judgement, for example, in the ‘symptoms’ subscale the items anxiety and depression were  
18 grouped together in factor 1 while antisocial behaviour and mania were categorised together in  
19 factor 2. In some instances, however, some items had lower loading values. The item ‘other  
20 mental health’ had a loading score of 0.186 in the ‘symptoms’ subscale suggesting a weaker  
21 association in comparison to the other items in this subscale. There is however, no rule of  
22 thumb regarding the optimal strength of factor loadings and thresholds. Indeed, one  
23 meta-analysis of the variance in factor loading has shown that there is no agreement to what  
24 constituents a high or low factor loading<sup>34</sup>. The items anxiety and depression clustered together  
25 with factor loading scores greater than 0.7 reflecting a higher degree of impact these items have  
26 when a young person prepares for transition. Similarly, in the ‘risk factors’ subscale the items  
27 ‘suicidal thoughts behaviours’ and ‘self-harming behaviours’ had the highest factor loading  
28 scores in comparison to the other items indicating that when it comes to risk and how it impacts  
29 on the preparedness of when a young person’s transition, suicidal thoughts and self-harming  
30 behaviours are two elements that can have a significant impact on how a young person  
31  
32  
33  
34  
35  
36  
37  
38  
39  
40  
41  
42  
43  
44  
45  
46  
47  
48  
49  
50  
51  
52  
53  
54  
55  
56  
57  
58  
59  
60

1  
2  
3 navigates transition. The barriers to functioning subscale revealed a three-factor model. On  
4  
5 closer examination, while five items clustered together in factor 1, the item ‘knowledge of  
6  
7 accessing services’ had the highest factor loading score in this factor. Interestingly, this score  
8  
9 was higher than the ‘ability to act independently’ score. This observation suggests that when it  
10  
11 comes to examine the barriers of transition, knowledge of accessing services are more  
12  
13 important than whether the young person has the ability to act independently or understands  
14  
15 the degree of how the severity of their mental illness will impact on the transition process.  
16  
17

### 18 19 **Strengths and limitations**

20  
21 The TRAM has a dual purpose: To identify who should be transitioned to adult mental health  
22  
23 services and to pinpoint areas which should be considered or addressed to ensure that the  
24  
25 transition process is smooth. The barriers to a successful transition are areas which clinicians  
26  
27 on both sides of the transition boundary can work on to improve the ease of transition. These  
28  
29 barriers include young people not being ready to act as an independent adult; young people not  
30  
31 understanding their mental health condition or not being motivated to manage their condition;  
32  
33 not having social support, not easily building therapeutic relationships and not easily being able  
34  
35 to repeat history. The TRAM score summary report contains the TRAM responses of the YP,  
36  
37 PC and CL, presented in visually attractive graphs and tables, and serves as a clinician decision  
38  
39 support tool and communication aid. Yellow highlights help clinicians focus on items requiring  
40  
41 attention. If a referral to adult services seems appropriate for the young person but barriers are  
42  
43 highlighted, the clinician can add these to the care plan and address them in a timely fashion to  
44  
45 help smoothen the transition process. Moving forward, based on the TRAM validation study  
46  
47 findings, a MILESTONE Transition Predictor will be developed on the HealthTracker™  
48  
49 platform, to be used in association with the TROM. As transition is dependent on symptoms  
50  
51 clusters, the Transition Predictor will be able to provide a personalised transition approach  
52  
53 depending on symptom profiling. This will involve using a traffic light scoring system to a  
54  
55  
56  
57  
58  
59  
60

1  
2  
3 modified TRAM score summary report to predict the outcome of transition based on symptom  
4 profiling. Together with the TROM, these clinical decision-making tools will be valuable in  
5  
6 identifying cases who need to transition based on symptomatology and then to assess the  
7  
8 outcomes of the transition process. Young persons undergoing transition present with complex  
9  
10 psychopathology and as such those participants who were the most severely ill or less engaged  
11  
12 with the transition process are least likely to have responded. The present study was also unable  
13  
14 to assess transition readiness and how it can evolve over across time. This would be important  
15  
16 given that young people are likely to have several transitions during their transition journey.  
17  
18 Future work would need to explore the longitudinal monitoring of transition readiness in young  
19  
20 people during their transition journey.  
21  
22  
23  
24  
25

## 26 **Conclusion**

27  
28 The current study suggests that the TRAM is a viable instrument for determining the readiness  
29  
30 of a young person and the appropriateness for transition from CAMHS. It is holistic in its scope  
31  
32 to ensure that the young person is seen as more than a list of symptoms and assessment involves  
33  
34 not only clinicians but also young people and their parents/carers. Being web-based allows the  
35  
36 measure to be used across countries by end users and enriches the transition process from  
37  
38 CAMHS to AMHS. This means that the TRAM has the potential to be used worldwide by end  
39  
40 users thereby contributing to a smoother transition process and allowing for personalised  
41  
42 mental health care. Ultimately this will have added value in informing the transition process  
43  
44 from CAMHS to AMHS. The TRAM is designed to work in conjunction with an instrument  
45  
46 that examines the outcome of transition.  
47  
48  
49  
50  
51  
52  
53  
54  
55  
56  
57  
58  
59  
60



## Funding

Funding for the MILESTONE project was given by the EU Seventh Framework Programme (grant number: 602442).

## Author Contributions

PS is the Principal Investigator; JS, HT and JW wrote the manuscript and alongside SG, ND and KDC assisted in revising the subsequent versions. NH, IS, MM, AP, EG, LM, GS, GA, FM, FR, VS and RA recruited subjects and were involved in data collection/management. LA, KL, HT and PT were involved in recruitment and the focus groups. FF was responsible for the data management component and subsequent analyses for the validation. SPS is the Chief Investigator of the MILESTONE project and obtained funding together with AM, CS, DP-O, DW, FCV, FM, GCD, GDG, JM, MP, PS, ST, TF and US. AW, AT and CG served as young project advisors and helped with the development of the TRAM. All authors critically reviewed the protocol and the manuscript and gave approval for the publication.

## Acknowledgements

### **The MILESTONE consortium: members and partner institutions:**

Swaran Singh, Helena Tuomainen, Jason Madan, Jane Warwick, Cathy Street, Dieter Wolke, Moli Paul, Claire Daffern, Priya Tah, Rebecca Appleton, Alastair Canaway, James Griffin, Philip Wells, Rose-Marie Lomax (University of Warwick, UK), Giovanni de Girolamo, Giulia Signorini, Alessandro Ferrari, Cecilia Ferrari, Laura Rivolta, Flavia Levi, Lidia Manenti, Eliza Gheza, Adriana Pastore, Maria Cataldo, Giorgia Morini, Cecilia Toselli, Pamela Stagni, Pamela Varvara (IRCCS Istituto Centro San Giovanni di Dio Fatebenefratelli, Brescia, Italy), Giovanni Allibrio, (ASST of Spedali Civili, Brescia, Italy), Ottaviano Martinelli (ASST Lecco, Italy), Patrizia Conti (ASST Lariana), Emiliano Monzani (Niguarda Metropolitan Great Hospital, Italy), Francesco Rinaldi (ASST of Valcamonica, Italy), Francesco Margari, Lucia Margari (University of Bari, Italy), Paola Stagi, Fabrizio Starace (Modena, Italy), Giuseppe Carrà (San Gerardo Hospital, Italy), Renata Nacinovic (ASST Monza, Italy), Paolo Scocco, Michela Gatta (DISM, Italy), Fabio Vanni, Sabrina Ferrari (AUSL of Parma, Italy), Marco Armando (Child Neuropsychiatric Unit, Department of Neuroscience, Bambino Gesù Children's Hospital, IRCCS, Rome, Italy; Department of Psychiatry of the University of

1  
2  
3 Geneva, Switzerland), Stefano Vicari (Child Neuropsychiatric Unit, Department of  
4 Neuroscience, Bambino Gesù Children's Hospital, IRCCS, Rome, Italy), Angelo Bertani  
5 (ASST Santi Paolo e Carlo, Italy), Edda Zanetti (ASST Spedali Civili, Brescia, Italy), Paramala  
6 Santosh, Leighton McFadden, Natalie Heaney, Mathilde Mastroianni, Federico Fiori, Jatinder  
7 Singh, Ilyas Sagar-Ouriaghi, Cassandra Deane (Kings College London, UK), Laura Adams  
8 (Plymouth University, UK), Diane Purper-Ouakil, Frédérick Russet, Virginie Maurice,  
9 Véronique Humbertclaude (Hôpital Saint Eloi, France), Renaud Jardri, Aesa Parenti (Centre  
10 Hospitalier Universitaire de Lille, France), David Da Fonseca, Isabelle Charvin (Centre  
11 Hospitalier Universitaire de Marseille, France), Frédérique Bonnet-Brilhault, Chrystèle Bodier,  
12 Catherine Prigent (Centre Hospitalier Universitaire de Tours, France), Mario Speranza, Hélène  
13 Lida-Pulik (CH Versailles, France), Athanasios Maras, Larissa van Bodegom, Mathilde  
14 Overbeek, Esther Kooymans, Iris Link (Yulius Academie, the Netherlands), Ulrike Schulze,  
15 Melanie Saam, Ulrike Breuninger, Jörg Fegert, Sonja Aslan, Sarah Miller (University of Ulm,  
16 Germany), Renate Schepker, Beata Williams, Anne Sartor, Elena Tanase (ZfP  
17 Südwürttemberg, Germany), Nichele Noterdaeme, Vehbi Sakar, Carolin von Bentzel  
18 (Josefinum Augsburg, Germany), Sabine Tremmery, Gaëlle Hendrickx, Veronique De Roeck  
19 (KU Leuven, Belgium), Fiona McNicholas, Lesley O'Hara, Rachael McKenna, Aleksandra  
20 Gronostaj, Ingrid Holme (University College Dublin, Ireland), Tomislav Franić, Nikolina  
21 Davidović (University Hospital Split, Croatia), Vlatka Kovač, Katarina Dodig-Ćurković  
22 (University of Osijek, Croatia), Frank Verhulst, Gwen Dieleman, Suzanne Gerritsen (Erasmus  
23 MC, The Netherlands), Kate Lievesley, Helen Furse, Paulina Nikolova, Todor Mutafov, Ivo  
24 Viliev, Vasil Dimov (HealthTracker, UK), Amanda Tuffrey, Anna Wilson, Charlotte Gatherer,  
25 Leanne Walker, Sarah Buttle, Caoimhe Kelly, Meghan Killilea, James Kirwan, Courtney  
26 Smyth, (Young project advisors affiliated with University of Warwick), Andrea Wohner  
27 (concentris research management GmbH, Germany), Nigel Jeffery, Suhas Hydros (Croydon  
28 CAMHS, UK), Richard Church (Lambeth CAMHS, UK), Omer Moghraby (Lewisham  
29 CAMHS, UK); Partha Banerjea (Southwark CAMHS, UK), Genevieve Riley, Pablo Ronzini,  
30 Rosemary Richards (2Gether NHS Foundation Trust, UK), Jo Berriman (South Staffordshire  
31 and Shropshire Healthcare NHS Foundation Trust SSSFT, UK), Vinuthna Pemmaraju (The  
32 Black Country Partnership Foundation NHS Trust, UK), Michael Slowik (Dudley and Walsall  
33 Mental Health Partnership NHS Trust, UK), Ben Rogers, Alan Farmer (Worcestershire Health  
34 and Care NHS Trust, UK), Ashley Liew, Tanveer Sandhu (Birmingham Children's Hospital,  
35 UK).

1  
2  
3 We extend our thanks and appreciation to the MILESTONE project consortium for their  
4 contribution.  
5  
6  
7

8 This project has received funding from the European Seventh Framework Programme for  
9 research, technological development and demonstration under grant agreement no 602442.  
10 This paper reflects only the author's views and the European Union is not liable for any use  
11 that may be made of the information contained therein.  
12  
13  
14  
15  
16  
17

### 18 **Conflicts of Interest**

19  
20 PS is the co-inventor of the HealthTracker™ and is the Chief Executive Officer and  
21 shareholder in HealthTracker Ltd. FF is a Chief Technical Officer and KL is a Project Manager  
22 employed by HealthTracker Ltd respectively.  
23  
24  
25  
26

27 FCV is the Dutch distributor of ASEBA from which he receives remuneration.  
28

29 SPS is part-funded by the National Institute for Health Research (NIHR) Collaboration for  
30 Leadership in Applied Health Research and Care WM (NIHR CLAHRC WM).  
31  
32  
33  
34  
35  
36  
37  
38  
39  
40  
41  
42  
43  
44  
45  
46  
47  
48  
49  
50  
51  
52  
53  
54  
55  
56  
57  
58  
59  
60

## References

1. While A, Forbes A, Ullman R, et al. (2004). Good practices that address continuity during transition from child to adult care: syntheses of the evidence. *Child: Care, Health and Development*. 30: 439–452.
2. Department of Health (2015). *Future in mind: promoting, protecting and improving our children and young people's mental health and wellbeing*. London: Department of Health Children and Young People's Mental Health Taskforce.
3. National Institute for Health and Care Excellence (NICE) *Transition from children's to adults' services for young people using health or social care services*. Guideline 43, London: NICE; 2016.
4. Steinkamp G, Ullrich G, Muller C. et al. (2001). Transition of adult patients with cystic fibrosis from paediatric to adult care: the patients' perspective before and after start-up of an adult clinic. *Eur. J. Med. Res*. 6: 85–92.
5. Shaw KL, Southwood TR, McDonagh JE. (2004). Users' perspectives of transitional care for adolescents with juvenile idiopathic arthritis. *Rheumatology*. 43: 770–778.
6. McDonagh JE, Southwood TR, Shaw KL. (2006). Growing up and moving on in rheumatology: development and preliminary evaluation of a transitional care programme for a multicentre cohort of adolescents with juvenile idiopathic arthritis. *J. Child Health Care*. 10: 22–42.
7. Zhang L, Ho J, Kennedy S. (2014). A systematic review of the psychometric properties of transition readiness assessment tools in adolescents with chronic disease. *BMC Pediatr*. 14: 4.
8. Lotstein DS, McPherson M, Strickland B, Newacheck PW. (2005). Transition planning for youth with special healthcare needs: results from the national survey of children with special health care needs. *Pediatrics* 115: 1562–1568.

- 1  
2  
3 9. Sawicki G, Lukens-Bull K. et al. (2011). Measuring the transition readiness of youth with  
4 special healthcare needs: validation of the TRAQ-Transition Readiness Assessment  
5 Questionnaire. *J. Pediatr. Psychol.* 10: 160–171.  
6  
7
- 8  
9  
10 10. Donahue SA, Manuel JI, Herman DB. et al. (2012). Development and use of a transition  
11 readiness scale to help manage ACT team capacity. *Psychiatr. Serv.* 63: 223-229.  
12  
13
- 14 11. Ferris ME, Harward DH, Bickford K. et al. (2012). A clinical tool to measure the  
15 components of health-care transition from paediatric care to adult care: the UNC  
16 TR(x)ANSITION scale. *Ren. Fail.* 34: 744-753.  
17  
18
- 19 12. van Staa A, van der Stege HA, Jedeloo S. et al. (2011). Readiness to transfer to adult care  
20 of adolescents with chronic conditions: exploration of associated factors. *J. Adolesc. Health.*  
21 48: 295-302.  
22  
23
- 24 13. Ware NC, Dickey B, Tugenberg T. et al. (2003). CONNECT: a measure of continuity of  
25 care in mental health services. *Ment. Health Serv. Res.* 4: 209-221.  
26  
27
- 28 14. Hadjistavropoulos H, Biem H, Sharpe D. et al. (2008). Patient perceptions of hospital  
29 discharge: reliability and validity of a Patient Continuity of Care Questionnaire. *Int. J. Qual.*  
30 *Health Care.* 20: 314-223.  
31  
32
- 33 15. Durbin J, Goering P, Streiner DL. et al. (2004). Continuity of care: validation of a new self-  
34 report measure for individuals using mental health services. *J. Behav. Health Serv. Res.* 31:  
35 279-296.  
36  
37
- 38 16. Schwartz LA, Daniel LC, Brumley LD. et al. (2014). Measures of readiness to transition to  
39 adult health care for youth with chronic physical health conditions: a systematic review and  
40 recommendations for measurement testing and development. *J. Pediatr. Psychol.* 39: 588-601.  
41  
42
- 43 17. Singh SP, Paul M, Ford T. et al. (2008). Transitions of care from child and adolescent  
44 mental health services to adult mental health services (TRACK study): a study of protocols in  
45 Greater London. *BMC Health Services Research.* 8, 1-7.  
46  
47  
48  
49  
50  
51  
52  
53  
54  
55  
56  
57  
58  
59  
60

18. Islam Z, Ford T, Kramer T, et al. (2016). Mind how you cross the gap! Outcomes for young people who failed to make the transition from child to adult services: the TRACK study. *BJPsych. Bull.* 40, 142-148.
19. Barr NG, Longo CJ, Embrett MG. et al. (2017). The transition from youth to adult mental health services and the economic impact on youth and their families. *Healthc Manage Forum.* 30: 283-288.
20. Broad KL, Sandhu VK, Sunderji N, Charach A. (2017). Youth experiences of transition from child mental health services to adult mental health services: a qualitative thematic synthesis. *BMC Psychiatry.* 17(1): 380.
21. Signorini G, Singh SP, Marsanic VB. et al. (2018). The interface between child/adolescent and adult mental health services: results from a European 28-country survey. *Eur. Child Adolesc. Psychiatry.* 2018 Jan 24.
22. Singh SP, Tuomainen H, Girolamo G. et al. (2017). Protocol for a cohort study of adolescent mental health service users with a nested cluster randomised controlled trial to assess the clinical and cost-effectiveness of managed transition in improving transitions from child to adult mental health services (the MILESTONE study). *BMJ Open.* 7(10): e016055.
23. Santosh P, et al. (2019). Protocol for the development and validation procedure of the Managing the Link and Strengthening Transition from Child to Adult Mental Health Care (MILESTONE) Suite of Measures. (manuscript in submission to *BMC Paediatrics*).
24. US Department of Health and Human Services Food and Drug Administration. (2009). Guidance for industry: patient-reported outcome measures: use in medical product development to support labeling claims. Secondary Guidance for industry: patient-reported outcome measures: use in medical product development to support labeling claims.
25. Wild D, Grove A, Martin M, Eremenco S, McElroy S, Verjee-Lorenz A, Erikson P; ISPOR Task Force for Translation and Cultural Adaptation (2005). Principles of Good Practice for the

- 1  
2  
3 Translation and Cultural Adaptation Process for Patient-Reported Outcomes (PRO) Measures:  
4 report of the ISPOR Task Force for Translation and Cultural Adaptation. *Value Health*. 8: 94-  
5  
6 104.  
7  
8  
9  
10 26. Sullivan, G. M., & Feinn, R. (2012). Using Effect Size-or Why the P Value Is Not Enough.  
11  
12 *Journal of Graduate Medical Education*, 4(3), 279-282.  
13  
14 27. Portney LG, Watkins MP. (2009). *Foundations of clinical research: Applications to*  
15  
16 *practice*. 3rd ed. Upper Saddle River, N.J.: Pearson/Prentice Hall.  
17  
18 28. Gowers SG, Harrington RC, Whitton A, et al. (1999). Brief scale for measuring the  
19  
20 outcomes of emotional and behavioural disorders in children. *Health of the Nation Outcome*  
21  
22 *Scales for children and Adolescents (HoNOSCA)*. *Br. J. Psychiatry* 174: 413–416.  
23  
24 29. Garralda ME, Yates P, Higginson I. (2000). Child and adolescent mental health service use.  
25  
26 *HoNOSCA as an outcome measure*. *Br. J. Psychiatry*. 177: 52–58.  
27  
28  
29 30. Guy W. In: *Handbook of Psychiatric Measures*. Rush AJ, editor. Washington, DC:  
30  
31 American Psychiatric Association; 2000. *Clinical Global Impressions Scale (CGI)* pp. 100–  
32  
33 102.  
34  
35 31. Schneider LC, Struening EL. SLOF: a behavioral rating scale for assessing the mentally ill.  
36  
37 *Soc. Work Res Abstr*. 1983 Fall;19(3):9-21.  
38  
39 32. Yates P, Garralda ME, Higginson I. Paddington Complexity Scale and Health of the Nation  
40  
41 *Outcome Scales for Children and Adolescents*. *British Journal of Psychiatry*. 1999;174:417–  
42  
43 423  
44  
45 33. Bilenberg N. *Health of the Nation Outcome Scales for Children and Adolescents*  
46  
47 *(HoNOSCA): Results of a Danish field trial*. *European Child and Adolescent Psychiatry*.  
48  
49 2003;12:298–302.  
50  
51 34. Peterson RA. A meta-analysis of variance accounted for and factor loadings in exploratory  
52  
53 factor analysis. *Marketing Letters*. 2000;11:261-275  
54  
55  
56  
57  
58  
59  
60

Figure 1: Summary of the main stages, methods and analyses of the TRAM

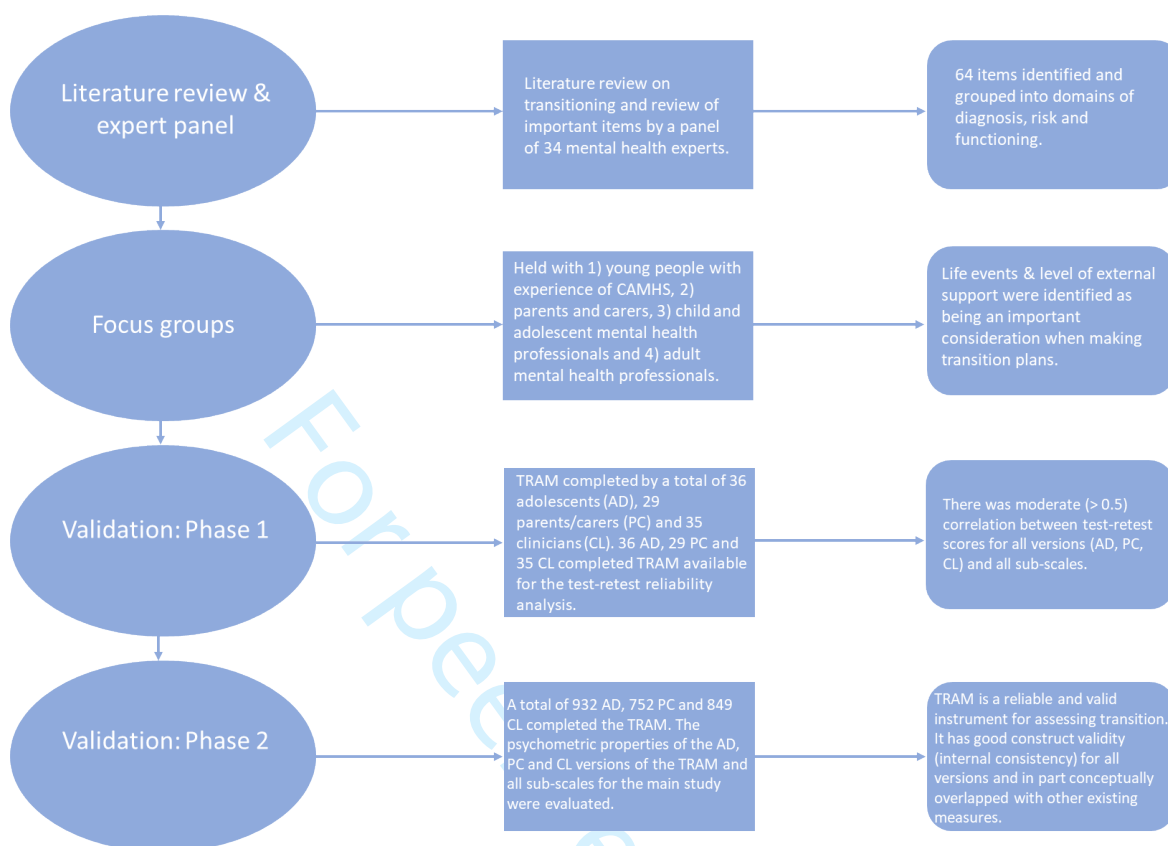

Abbreviations: AD (Adolescents), Clinicians (CL), PC (Parent/Carer)



Table 1. Test-retest Reliability of the TRAM (n=100)

## (A) Pearson's correlation coefficients

| <b>Sub-Scale</b>           | <b>Adolescent<br/>(AD: n=36)</b> | <b>Parent/Carer<br/>(PC: n=29)</b> | <b>Clinician<br/>(CL: n=35)</b> |
|----------------------------|----------------------------------|------------------------------------|---------------------------------|
| Symptoms                   | .928**                           | .936**                             | .773**                          |
| Overall Disruption         | .817**                           | .935**                             | .942**                          |
| Barriers to Functioning    | .813**                           | .908**                             | .824**                          |
| Risk Factors               | .897**                           | .864**                             | .914**                          |
| Factors Affecting Symptoms | .734**                           | .679**                             | .912**                          |

Key:  $p < 0.01^{**}$

## (B) Mean and Standard deviations

| <b>Sub-Scale</b>                  |                    | <b>Adolescent<br/>(AD: n=36)</b> |         | <b>Parent/Carer<br/>(PC: n=29)</b> |         | <b>Clinician<br/>(CL: n=35)</b> |         |
|-----------------------------------|--------------------|----------------------------------|---------|------------------------------------|---------|---------------------------------|---------|
|                                   |                    | Baseline                         | Re-test | Baseline                           | Re-test | Baseline                        | Re-test |
| <b>Symptoms</b>                   | Mean               | 16.667                           | 14.167  | 12.379                             | 10.466  | 11.629                          | 11.300  |
|                                   | Standard Deviation | 9.789                            | 9.667   | 8.548                              | 8.757   | 5.945                           | 6.253   |
| <b>Overall Disruption</b>         | Mean               | 9.944                            | 8.694   | 8.655                              | 8.379   | 11.086                          | 11.200  |
|                                   | Standard Deviation | 6.697                            | 5.956   | 8.784                              | 8.954   | 7.625                           | 8.554   |
| <b>Barriers to Functioning</b>    | Mean               | 7.472                            | 6.778   | 6.655                              | 6.034   | 7.086                           | 6.314   |
|                                   | Standard Deviation | 3.501                            | 3.743   | 4.685                              | 3.530   | 3.673                           | 3.636   |
| <b>Risk Factors</b>               | Mean               | 6.847                            | 6.167   | 4.621                              | 4.379   | 5.829                           | 6.014   |
|                                   | Standard Deviation | 4.657                            | 4.623   | 4.037                              | 4.212   | 4.711                           | 4.999   |
| <b>Factors Affecting Symptoms</b> | Mean               | 2.167                            | 1.889   | 1.759                              | 1.276   | 2.171                           | 2.029   |
|                                   | Standard Deviation | 1.464                            | 1.348   | 1.596                              | 1.251   | 1.445                           | 1.224   |

Table 2. Pearson's product moment correlation coefficients for the TRAM sub-scales with HoNOSCA and CGI scales.

| Scales            | TRAM Sub-Scales |                    |               |                            |                         |
|-------------------|-----------------|--------------------|---------------|----------------------------|-------------------------|
|                   | Symptom         | Overall Disruption | Risk Factors  | Factors affecting Symptoms | Barriers to functioning |
| <b>HoNOSCA AD</b> | .378**(n=914)   | .345**(n=914)      | .370**(n=914) | .306**(n=914)              | .249**(n=577)           |
| <b>HoNOSCA PC</b> | .369**(n=738)   | .329**(n=738)      | .374**(n=738) | .349**(n=738)              | .151**(n=477)           |
| <b>HoNOSCA CL</b> | .478**(n=845)   | .437**(n=845)      | .442**(n=845) | .357**(n=845)              | .340**(n=502)           |
| <b>CGI-S AD</b>   | .242**(n=832)   | .261**(n=832)      | .210**(n=832) | .294**(n=832)              | .149**(n=527)           |
| <b>CGI-S PC</b>   | .319**(n=684)   | .285**(n=684)      | .237**(n=684) | .338**(n=684)              | .187**(n=444)           |
| <b>CGI-S CL</b>   | .548**(n=836)   | .514**(n=836)      | .373**(n=836) | .352**(n=182)              | .307**(n=499)           |

Key:  $p < 0.01^{**}$ ; Null hypothesis is that the Pearson's correlation coefficient equals zero.

Abbreviations: AD (Adolescents), CGI-S (Clinical Global Impression Severity); Clinicians (CL), HoNOSCA (Health of the Nation Outcome Scale for Children and Adolescents), PC (Parent/Carer).

Table 3. Summary of Pearson’s Correlation of the TRAM sub-scales with SLOF Subscales

| Sub-scale                  | Adolescent           |                      |                             |                      |                 |                 |
|----------------------------|----------------------|----------------------|-----------------------------|----------------------|-----------------|-----------------|
|                            | Physical Functioning | Personal Care Skills | Interpersonal Relationships | Social Acceptability | Activities      | Work Skills     |
| Symptoms                   | -0.068 (n=732)       | -.098** (n=732)      | -.159** (n=732)             | -.302** (n=732)      | -0.054 (n=732)  | -.085* (n=732)  |
| Overall disruption         | -.107** (n=732)      | -.157** (n=732)      | -.265** (n=732)             | -.286** (n=732)      | -.181** (n=732) | -.138** (n=732) |
| Risk Factors               | -0.026 (n=732)       | -0.022 (n=732)       | -.106** (n=732)             | -.299** (n=732)      | 0.006 (n=732)   | -0.004 (n=732)  |
| Factors Affecting Symptoms | -0.062 (n=732)       | -0.033 (n=732)       | -.087* (n=732)              | -.217** (n=732)      | -0.042 (n=732)  | -0.025 (n=732)  |
| Barriers to Functioning    | -0.070 (n=475)       | -.186** (n=475)      | -.216** (n=475)             | -.229** (n=475)      | -.199** (n=475) | -.239** (n=475) |

  

| Sub-scale                  | Parent               |                      |                             |                      |                 |                 |
|----------------------------|----------------------|----------------------|-----------------------------|----------------------|-----------------|-----------------|
|                            | Physical Functioning | Personal Care Skills | Interpersonal Relationships | Social Acceptability | Activities      | Work Skills     |
| Symptoms                   | -.180** (n=744)      | -.275** (n=744)      | -.411** (n=744)             | -.569** (n=744)      | -.306** (n=744) | -.223** (n=744) |
| Overall disruption         | -.234** (n=744)      | -.552** (n=744)      | -.571** (n=744)             | -.494** (n=744)      | -.575** (n=744) | -.436** (n=744) |
| Risk Factors               | -.170** (n=744)      | -.228** (n=744)      | -.300** (n=744)             | -.597** (n=744)      | -.223** (n=744) | -.125** (n=744) |
| Factors Affecting Symptoms | -0.067 (n=744)       | -.141** (n=744)      | -.201** (n=744)             | -.394** (n=744)      | -.126** (n=744) | -.091* (n=744)  |
| Barriers to Functioning    | -.198** (n=483)      | -.420** (n=483)      | -.461** (n=483)             | -.417** (n=483)      | -.528** (n=483) | -.472** (n=483) |

  

| Sub-scale                  | Clinician            |                      |                             |                      |                 |                 |
|----------------------------|----------------------|----------------------|-----------------------------|----------------------|-----------------|-----------------|
|                            | Physical Functioning | Personal Care Skills | Interpersonal Relationships | Social Acceptability | Activities      | Work Skills     |
| Symptoms                   | -.087* (n=678)       | -.155** (n=678)      | -.211** (n=678)             | -.242** (n=678)      | -.138** (n=678) | -.154** (n=678) |
| Overall disruption         | -.130** (n=678)      | -.332** (n=678)      | -.399** (n=678)             | -.279** (n=678)      | -.392** (n=678) | -.316** (n=678) |
| Risk Factors               | -0.071 (n=678)       | -.137** (n=678)      | -.194** (n=678)             | -.358** (n=678)      | -.076* (n=678)  | -.106** (n=678) |
| Factors Affecting Symptoms | 0.012 (n=132)        | -0.068 (n=132)       | -0.084 (n=132)              | -.253** (n=132)      | -0.046 (n=132)  | -0.100 (n=132)  |
| Barriers to Functioning    | -0.048 (n=414)       | -.240** (n=414)      | -.189** (n=414)             | -.275** (n=414)      | -.256** (n=414) | -.322** (n=414) |

Key:  $p < 0.01^{**}$ ,  $p < 0.05^{*}$ ; Null hypothesis is that the Pearson’s correlation coefficient equals zero.

Table 4. Summary of EFA for the Adolescent version of the TRAM's sub-scales

| <b>Symptoms Sub-Scale</b>                  |                        |                            |
|--------------------------------------------|------------------------|----------------------------|
|                                            | Factors                |                            |
|                                            | Internalising Symptoms | Externalizing Symptoms     |
| <b>Anxiety</b>                             | <b>0.896</b>           | -0.222                     |
| <b>Depression</b>                          | <b>0.794</b>           | 0.020                      |
| <b>Borderline personality</b>              | <b>0.482</b>           | 0.334                      |
| <b>Post-traumatic stress</b>               | <b>0.358</b>           | 0.197                      |
| <b>Social communication difficulties</b>   | <b>0.356</b>           | 0.196                      |
| <b>Eating difficulties</b>                 | <b>0.313</b>           | 0.086                      |
| <b>Other mental health</b>                 | <b>0.186</b>           | 0.107                      |
| <b>Antisocial behaviour</b>                | -0.083                 | <b>0.585</b>               |
| <b>Mania</b>                               | -0.019                 | <b>0.570</b>               |
| <b>Attention deficit</b>                   | 0.139                  | <b>0.380</b>               |
| <b>Psychosis</b>                           | 0.282                  | <b>0.366</b>               |
| <b>Overall disruption Sub-Scale</b>        |                        |                            |
|                                            | Factors                |                            |
|                                            | Relationships          | Activities of Daily Living |
| <b>Relationships with friends</b>          | <b>0.903</b>           | -0.088                     |
| <b>Relationships with peers/colleagues</b> | <b>0.845</b>           | -0.082                     |
| <b>Social</b>                              | <b>0.550</b>           | 0.199                      |
| <b>Relationships with family</b>           | <b>0.455</b>           | 0.124                      |
| <b>Education work performance</b>          | <b>0.406</b>           | 0.256                      |
| <b>Sleep</b>                               | <b>0.360</b>           | 0.244                      |
| <b>Household chores</b>                    | 0.017                  | <b>0.721</b>               |
| <b>Self-care</b>                           | -0.059                 | <b>0.708</b>               |
| <b>Responsibility</b>                      | 0.048                  | <b>0.678</b>               |
| <b>Community</b>                           | 0.252                  | <b>0.432</b>               |

| <b>Barriers to Functioning Sub-Scale</b>      |                 |                |              |
|-----------------------------------------------|-----------------|----------------|--------------|
|                                               | Factors         |                |              |
|                                               | Patient Factors | Family Support | Treatment    |
| <b>Knowledge of accessing service</b>         | <b>0.636</b>    | -0.103         | -0.053       |
| <b>Ability to act as independent</b>          | <b>0.591</b>    | -0.232         | 0.031        |
| <b>Understanding of mental health</b>         | <b>0.496</b>    | 0.055          | -0.061       |
| <b>Adolescent built trusting relationship</b> | <b>0.420</b>    | 0.225          | 0.011        |
| <b>Ability to repeat history</b>              | <b>0.413</b>    | 0.230          | -0.087       |
| <b>Adolescent wants parent carer</b>          | -0.078          | <b>0.691</b>   | -0.100       |
| <b>Presence of support</b>                    | 0.031           | <b>0.527</b>   | 0.141        |
| <b>Taking medication as prescribed</b>        | -0.149          | -0.052         | <b>0.529</b> |
| <b>Motivation to manage condition</b>         | 0.172           | 0.081          | <b>0.496</b> |

| <b>Risk Factors Sub Scale</b>       |               |               |
|-------------------------------------|---------------|---------------|
|                                     | Factors       |               |
|                                     | Internal Risk | External Risk |
| <b>Suicidal thoughts behaviours</b> | <b>0.848</b>  | 0.001         |
| <b>Self-harming behaviours</b>      | <b>0.788</b>  | -0.056        |
| <b>Stress</b>                       | <b>0.397</b>  | 0.130         |
| <b>Risk to others</b>               | -0.073        | <b>0.649</b>  |
| <b>Risk to self</b>                 | 0.145         | <b>0.529</b>  |
| <b>Risk from others</b>             | 0.234         | <b>0.269</b>  |

| <b>Factors Affecting Symptoms Sub-Scale</b> |                           |                        |
|---------------------------------------------|---------------------------|------------------------|
|                                             | Factors                   |                        |
|                                             | Relapse of Illness Factor | Somatic Illness Factor |
| <b>Inpatient hospital stays</b>             | <b>0.594</b>              | -0.088                 |
| <b>Service use in times of crisis</b>       | <b>0.569</b>              | -0.037                 |
| <b>Relapse likelihood</b>                   | <b>0.477</b>              | 0.145                  |
| <b>Ongoing treatment need</b>               | <b>0.365</b>              | 0.146                  |
| <b>Drug alcohol misuse</b>                  | <b>0.363</b>              | -0.110                 |
| <b>Presence of side effects</b>             | -0.041                    | <b>0.461</b>           |
| <b>Medical comorbidity</b>                  | -0.039                    | <b>0.335</b>           |

Or peer review only

# BMJ Open

## Validation of the Transition Readiness and Appropriateness Measure (TRAM) for the Managing the Link and Strengthening Transition from Child to Adult Mental Health Care (MILESTONE) study

|                               |                                                                                                                                                                                                                                                                                                                                                                                                                                                                                                                                                                                                                                                                                                                                                                                                                                                                                                                                                                                                                                                                                                                                                                                                                                                                                                                                                                                                                                                                                                                                                                                                                                                                                                                                                                                                                                                                                                                                                                                                                                                                                                                                                                                               |
|-------------------------------|-----------------------------------------------------------------------------------------------------------------------------------------------------------------------------------------------------------------------------------------------------------------------------------------------------------------------------------------------------------------------------------------------------------------------------------------------------------------------------------------------------------------------------------------------------------------------------------------------------------------------------------------------------------------------------------------------------------------------------------------------------------------------------------------------------------------------------------------------------------------------------------------------------------------------------------------------------------------------------------------------------------------------------------------------------------------------------------------------------------------------------------------------------------------------------------------------------------------------------------------------------------------------------------------------------------------------------------------------------------------------------------------------------------------------------------------------------------------------------------------------------------------------------------------------------------------------------------------------------------------------------------------------------------------------------------------------------------------------------------------------------------------------------------------------------------------------------------------------------------------------------------------------------------------------------------------------------------------------------------------------------------------------------------------------------------------------------------------------------------------------------------------------------------------------------------------------|
| Journal:                      | <i>BMJ Open</i>                                                                                                                                                                                                                                                                                                                                                                                                                                                                                                                                                                                                                                                                                                                                                                                                                                                                                                                                                                                                                                                                                                                                                                                                                                                                                                                                                                                                                                                                                                                                                                                                                                                                                                                                                                                                                                                                                                                                                                                                                                                                                                                                                                               |
| Manuscript ID                 | bmjopen-2019-033324.R1                                                                                                                                                                                                                                                                                                                                                                                                                                                                                                                                                                                                                                                                                                                                                                                                                                                                                                                                                                                                                                                                                                                                                                                                                                                                                                                                                                                                                                                                                                                                                                                                                                                                                                                                                                                                                                                                                                                                                                                                                                                                                                                                                                        |
| Article Type:                 | Original research                                                                                                                                                                                                                                                                                                                                                                                                                                                                                                                                                                                                                                                                                                                                                                                                                                                                                                                                                                                                                                                                                                                                                                                                                                                                                                                                                                                                                                                                                                                                                                                                                                                                                                                                                                                                                                                                                                                                                                                                                                                                                                                                                                             |
| Date Submitted by the Author: | 21-Jan-2020                                                                                                                                                                                                                                                                                                                                                                                                                                                                                                                                                                                                                                                                                                                                                                                                                                                                                                                                                                                                                                                                                                                                                                                                                                                                                                                                                                                                                                                                                                                                                                                                                                                                                                                                                                                                                                                                                                                                                                                                                                                                                                                                                                                   |
| Complete List of Authors:     | <p>Santosh, Paramala; King's College London , Child and Adolescent Psychiatry</p> <p>Singh, Jatinder; Institute of Psychiatry, Psychology &amp; Neuroscience, Department of Child and Adolescent Psychiatry</p> <p>Adams, Laura; University of Plymouth, School of Psychology</p> <p>Mastroianni, Mathilde; King's College London , Child and Adolescent Psychiatry</p> <p>Heaney, Natalie; King's College London , Child and Adolescent Psychiatry</p> <p>Lievesley, Kate; HealthTracker</p> <p>Sagar-Ouriaghli, Ilyas; King's College London , Child and Adolescent Psychiatry</p> <p>Allibrio, Giovanni; ASST Spedali Civili di Brescia Dipartimento di Salute Mentale, Unit of Neuropsychiatry</p> <p>Appleton, Rebecca; University of Warwick, Warwick Medical School</p> <p>Davidović, Nikolina; Department of Psychiatry, Clinical Hospital Center Split,</p> <p>De Girolamo, Giovanni; Saint John of God Clinical Research Center, Brescia, Italy, Psychiatric Epidemiology and Evaluation Unit</p> <p>Dieleman, Gwen; Erasmus MC, Department of Child and Adolescent Psychiatry and Psychology</p> <p>Dodig-Ćurković, Katarina; KBC Osijek, Department of Pediatric and Adolescent Psychiatry</p> <p>Franić, Tomislav; Department of Psychiatry, Clinical Hospital Center Split</p> <p>Gatherer, Charlotte; University of Warwick, Warwick Medical School</p> <p>Gerritsen, Suzanne; Erasmus MC, Department of Child and Adolescent Psychiatry and Psychology</p> <p>Gheza, Elisa; ASST della Valcamonica, Mental Health Department</p> <p>Madan, Jason; University of Warwick, Warwick Medical School</p> <p>Manenti, Lidia; ASST Spedali Civili di Brescia Dipartimento di Salute Mentale, Unit of Neuropsychiatry</p> <p>Maras, Athanasios; Yulius Academy, Rotterdam, Netherlands; Department of Child and Adolescent Psychiatry and Psychology, Erasmus Medical Center, Rotterdam, Netherlands</p> <p>Margari, Francesco; University of Bari, Department of Basic Medical Sciences, Neuroscience and Sense Organs</p> <p>McNicholas, Fiona; University College Dublin School of Medicine and Medical Science, SMMS; Our Lady's Hospital For Sick Children, Child Psychiatry</p> |

|                                 |                                                                                                                                                                                                                                                                                                                                                                                                                                                                                                                                                                                                                                                                                                                                                                                                                                                                                                                                                                                                                                                                                                                                                                                                                                                                                                                                                                                                                                                                                                                                                                                                                                                                                              |
|---------------------------------|----------------------------------------------------------------------------------------------------------------------------------------------------------------------------------------------------------------------------------------------------------------------------------------------------------------------------------------------------------------------------------------------------------------------------------------------------------------------------------------------------------------------------------------------------------------------------------------------------------------------------------------------------------------------------------------------------------------------------------------------------------------------------------------------------------------------------------------------------------------------------------------------------------------------------------------------------------------------------------------------------------------------------------------------------------------------------------------------------------------------------------------------------------------------------------------------------------------------------------------------------------------------------------------------------------------------------------------------------------------------------------------------------------------------------------------------------------------------------------------------------------------------------------------------------------------------------------------------------------------------------------------------------------------------------------------------|
|                                 | <p>Pastore, Adriana; University of Bari, Department of Basic Medical Sciences, Neuroscience and Sense Organs</p> <p>Paul, Moli; Coventry and Warwickshire Partnership NHS Trust; University of Warwick, Warwick Medical School</p> <p>Purper-Ouakil, Diane; Centre Hospitalier Regional Universitaire de Montpellier</p> <p>Rinaldi, Francesco; ASST della Valcamonica, Mental Health Department</p> <p>Sakar, Vehbi; Universitätsklinikum Ulm</p> <p>Schulze, Ulrike; Universitätsklinikum Ulm</p> <p>Signorini, Giulia; Psychiatric Epidemiology and Evaluation Unit, Saint John of God Clinical Research Center, Brescia, Italy</p> <p>Street, Cathy; University of Warwick, Warwick Medical School</p> <p>Tah, Priya ; University of Warwick, Warwick Medical School</p> <p>Tremmery, Sabine; Katholieke Universiteit Leuven, Department of Neurosciences, Child &amp; Adolescent Psychiatry</p> <p>Tuffrey, Amanda; University of Warwick, Warwick Medical School</p> <p>Tuomainen, Helena; University of Warwick, Warwick Medical School</p> <p>Verhulst, Frank; Department of Child and Adolescent Psychiatry and Psychology, Erasmus Medical Center, Rotterdam, Netherlands</p> <p>Warwick, Jane; University of Warwick Warwick Medical School, Warwick Clinical Trials Unit</p> <p>Wilson, Anna; University of Warwick, Warwick Medical School</p> <p>Wolke, Dieter; University of Warwick, Department of Psychology and Division of Mental Health and Wellbeing</p> <p>Fiori, Federico; Institute of Psychiatry, Psychology &amp; Neuroscience, Department of Child and Adolescent Psychiatry</p> <p>Singh, Swaran; Warwick Medical School, Health Sciences Research Institute</p> |
| <b>Primary Subject Heading</b>: | Mental health                                                                                                                                                                                                                                                                                                                                                                                                                                                                                                                                                                                                                                                                                                                                                                                                                                                                                                                                                                                                                                                                                                                                                                                                                                                                                                                                                                                                                                                                                                                                                                                                                                                                                |
| Secondary Subject Heading:      | Health informatics, Health services research, Paediatrics                                                                                                                                                                                                                                                                                                                                                                                                                                                                                                                                                                                                                                                                                                                                                                                                                                                                                                                                                                                                                                                                                                                                                                                                                                                                                                                                                                                                                                                                                                                                                                                                                                    |
| Keywords:                       | Transition Readiness and Appropriateness Measure (TRAM), Validation, Child and Adolescent Mental Health Services, Adult Mental Health Services, Young Persons                                                                                                                                                                                                                                                                                                                                                                                                                                                                                                                                                                                                                                                                                                                                                                                                                                                                                                                                                                                                                                                                                                                                                                                                                                                                                                                                                                                                                                                                                                                                |
|                                 |                                                                                                                                                                                                                                                                                                                                                                                                                                                                                                                                                                                                                                                                                                                                                                                                                                                                                                                                                                                                                                                                                                                                                                                                                                                                                                                                                                                                                                                                                                                                                                                                                                                                                              |

SCHOLARONE™  
Manuscripts



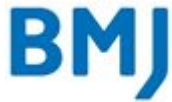

I, the Submitting Author has the right to grant and does grant on behalf of all authors of the Work (as defined in the below author licence), an exclusive licence and/or a non-exclusive licence for contributions from authors who are: i) UK Crown employees; ii) where BMJ has agreed a CC-BY licence shall apply, and/or iii) in accordance with the terms applicable for US Federal Government officers or employees acting as part of their official duties; on a worldwide, perpetual, irrevocable, royalty-free basis to BMJ Publishing Group Ltd ("BMJ") its licensees and where the relevant Journal is co-owned by BMJ to the co-owners of the Journal, to publish the Work in this journal and any other BMJ products and to exploit all rights, as set out in our [licence](#).

The Submitting Author accepts and understands that any supply made under these terms is made by BMJ to the Submitting Author unless you are acting as an employee on behalf of your employer or a postgraduate student of an affiliated institution which is paying any applicable article publishing charge ("APC") for Open Access articles. Where the Submitting Author wishes to make the Work available on an Open Access basis (and intends to pay the relevant APC), the terms of reuse of such Open Access shall be governed by a Creative Commons licence – details of these licences and which [Creative Commons](#) licence will apply to this Work are set out in our licence referred to above.

Other than as permitted in any relevant BMJ Author's Self Archiving Policies, I confirm this Work has not been accepted for publication elsewhere, is not being considered for publication elsewhere and does not duplicate material already published. I confirm all authors consent to publication of this Work and authorise the granting of this licence.

1  
2  
3  
4  
5  
6  
7  
8  
9  
10  
11  
12  
13  
14  
15  
16  
17  
18  
19  
20  
21  
22  
23  
24  
25  
26  
27  
28  
29  
30  
31  
32  
33  
34  
35

# Validation of the Transition Readiness and Appropriateness Measure (TRAM) for the Managing the Link and Strengthening Transition from Child to Adult Mental Health Care (MILESTONE) study

36  
37  
38  
39  
40  
41  
42  
43  
44  
45  
46  
47  
48  
49  
50  
51  
52  
53  
54  
55  
56  
57  
58  
59  
60

Santosh P<sup>1,2,3</sup>, Singh J<sup>1,2</sup>, Adams L<sup>4</sup>, Mastroianni M<sup>1</sup>, Heaney N<sup>1</sup>, Lievesley K<sup>3</sup>, Sagar-Ouriaghli I<sup>1</sup>, Allibrio G<sup>5</sup>, Appleton R<sup>6</sup>, Davidovic N<sup>7</sup>, de Girolamo G<sup>8</sup>, Dieleman GC<sup>9</sup>, Dodig Curkovic K<sup>10</sup>, Franić T<sup>7</sup>, Gatherer C<sup>6</sup>, Gerritsen S<sup>9</sup>, Gheza E<sup>11</sup>, Madan J<sup>12</sup>, Manenti L<sup>5</sup>, Maras A<sup>9,13</sup>, Margari F<sup>14</sup>, McNicholas F<sup>15,16,17,18</sup>, Pastore A<sup>14</sup>, Paul M<sup>6,19</sup>, Purper-Ouakil D<sup>20</sup>, Rinaldi F<sup>11</sup>, Sakar V<sup>21</sup>, Schulze UME<sup>21</sup>, Signorini G<sup>8</sup>, Street C<sup>6</sup>, Tah P<sup>6</sup>, Tremmery S<sup>22,23</sup>, Tuffrey A<sup>6</sup>, Tuomainen H<sup>6</sup>, Verhulst FC<sup>9</sup>, Warwick J<sup>12</sup>, Wilson A<sup>6</sup>, Wolke D<sup>6,24</sup>, Fiori F<sup>1,2,3</sup>, Singh S P<sup>6,19</sup>  
for the MILESTONE Consortium

## Affiliations:

<sup>1</sup>Department of Child and Adolescent Psychiatry, King's College London, London, UK.

<sup>2</sup>Centre for Interventional Paediatric Psychopharmacology and Rare Diseases, South London and Maudsley NHS Foundation Trust, London, UK.

<sup>3</sup>HealthTracker Ltd, Gillingham, Kent, United Kingdom.

<sup>4</sup>School of Psychology, Plymouth University, UK.

<sup>5</sup>Unit of Neuropsychiatry, ASST Spedali Civili, Brescia, Italy

<sup>6</sup>Mental Health and Wellbeing, Warwick Medical School, University of Warwick, Coventry, UK.

<sup>7</sup>Department of Psychiatry, Clinical Hospital Center Split, Split, Croatia.

<sup>8</sup>IRCCS Istituto Centro San Giovanni di Dio Fatebenefratelli, Brescia, Italy.

<sup>9</sup>Department of Child and Adolescent Psychiatry and Psychology, Erasmus Medical Center, Rotterdam, The Netherlands.

<sup>10</sup>Institute for Child and Adolescent Psychiatry, University Health Center Osijek, Croatia

<sup>11</sup>Neuropsychiatry Service of Childhood and Adolescence, Mental Health Department, ASST Valcamonica Esine, Brescia, Italy

<sup>12</sup>Warwick Clinical Trials Unit, Warwick Medical School, Warwick Medical School, Coventry, UK.

<sup>13</sup>Yulius Academy, Rotterdam, The Netherlands.

<sup>14</sup>Department of Basic Medical Sciences, Neuroscience and Sense Organs, University of Bari, Italy

<sup>15</sup>Department of Child and Adolescent Psychiatry, University College Dublin School of Medicine and Medical Science, Dublin, Republic of Ireland.

<sup>16</sup>Geary Institute, University College Dublin, Dublin, Republic of Ireland.

<sup>17</sup>Department of Child Psychiatry, Our Lady's Hospital for Sick Children, Dublin, Republic of Ireland.

<sup>18</sup>Lucena Clinic, SJOG, Dublin, Republic of Ireland.

<sup>19</sup>Coventry and Warwickshire Partnership NHS Trust, UK.

<sup>20</sup>CHU Montpellier / University of Montpellier; Saint Eloi Hospital; Médecine Psychologique de l'enfant et de adolescent (MPEA1); Montpellier, France.

<sup>21</sup>Department of Child and Adolescent Psychiatry/Psychotherapy, University of Ulm, Ulm, Germany.

<sup>22</sup>Department of Neurosciences, Child & Adolescent Psychiatry, University of Leuven, Leuven, Belgium.

<sup>23</sup>Department of Child & Adolescent Psychiatry, University Hospitals Leuven, Leuven, Belgium.

<sup>24</sup>Department of Psychology, University of Warwick, Coventry, UK.

### **Corresponding author:**

Professor Paramala Santosh,

Centre for Interventional Paediatric Psychopharmacology and Rare Diseases (CIPPRD)

Research Team,

4 Windsor Walk, Denmark Hill,

London SE5 8BB,

United Kingdom

E-mail: [paramala.1.santosh@kcl.ac.uk](mailto:paramala.1.santosh@kcl.ac.uk)

### **Key Words**

Transition Readiness and Appropriateness Measure (TRAM); Validation; Child and Adolescent Mental Health Services; Adult Mental Health Services; Young Persons

## Abstract

**Objective:** Young people moving from child and adolescent mental health services (CAMHS) to adult mental health services (AMHS) are faced with significant challenges. To improve this state of affairs not only does there need to be a recognition of the problem and initiatives but an urgent requirement for appropriate tools for measuring readiness and outcomes at the transfer boundary (16-18 years old in Europe). The objective of this study was to develop and validate the Transition Readiness and Appropriateness Measure (TRAM) for assessing a young person's readiness for transition, and their outcomes at the transfer boundary.

**Design:** MILESTONE cohort study and nested cluster randomised trial.

**Setting:** Eight European Union countries participating in the European Union (EU) funded MILESTONE study.

**Participants:** The first phase (MILESTONE validation study) involved 100 adolescents (pre-transition), young adults (post-transition), parents/carers and both CAMHS and AMHS clinicians. The second phase (MILESTONE cohort study and nested cluster randomised trial) involved over 1000 young people.

**Results:** The development of the TRAM began with a literature review on transitioning and a review of important items regarding transition by a panel of 34 mental health experts. A list of 64 items of potential importance were identified, which together comprised the TRAM. The psychometric properties of the different versions of the TRAM were evaluated and showed that the TRAM had good reliability for all versions and low to moderate correlations when compared with other established instruments and a well-defined factor structure. The main results of the cohort study are not reported.

**Conclusion:** The TRAM is a reliable instrument for assessing transition readiness and appropriateness. It highlighted the barriers to a successful transition and informed clinicians,

1  
2  
3 identifying areas which clinicians on both sides of the transfer boundary can work on to ease  
4  
5 the transition for the young person.  
6  
7  
8  
9  
10  
11  
12  
13  
14  
15  
16  
17  
18  
19  
20  
21  
22  
23  
24  
25  
26  
27  
28  
29  
30  
31  
32  
33  
34  
35  
36  
37  
38  
39  
40  
41  
42  
43  
44  
45  
46  
47  
48  
49  
50  
51  
52  
53  
54  
55  
56  
57  
58  
59  
60

For peer review only

### Strengths and limitations of this study

- The European Union (EU) funded Managing the Link and Strengthening Transition from Child to Adult Mental Health Care (MILESTONE) study provides a useful model to evaluate the readiness of transition for young people.
- MILESTONE study allowed the TRAM to be holistic in its scope because it ensured that all the essential information to assist with transition from CAMHS to AMHS was captured in its entirety especially given the fact that the transition journey for young people is very difficult and often poorly managed.
- The focus groups gathered extensive input from young people, their family members and mental health professionals with experience in transition within mental health.
- The web-based aspect of the TRAM allowed it to be completed remotely using developmentally appropriate interfaces, which aided in its completion.
- Transition is not static and further evaluation of the TRAM is warranted in young people to assess transition readiness longitudinally.

## Introduction

Ensuring a smooth transition process from paediatric to adult healthcare services has been a significant challenge for healthcare providers in recent years. Young people with chronic somatic conditions usually undergo a review when they reach the service transfer boundary<sup>1</sup>; however, in the mental healthcare setting an assessment of transition readiness and appropriateness of young people to transfer has not been well developed. Transition in mental health services refers to the process of young people moving from child and adolescent mental health services (CAMHS) to adult mental health services (AMHS – specialist adult teams and community-based services)<sup>2</sup>, the boundary being the age at which they can no longer access care from CAMHS (16-18 years old in Europe). Amongst countries in the European Union, only Denmark and the U.K. have guidelines detailing how the process should be managed, and only 40% of member states have facilities for transition planning<sup>3</sup>. Despite this, transition transfer across the CAMHS - AMHS boundary has received less research attention than transitions in other healthcare settings, such as for young people with chronic conditions<sup>4-7</sup> or special healthcare needs<sup>8</sup>.

Transition in the mental health setting requires a multidimensional approach that covers a young person's psychosocial, educational and vocational needs. Various assessments of improving transition outcomes have been developed<sup>9-16</sup>. Some explore the readiness for transition, such as treatment engagement, medication use and housing<sup>10</sup>, while others have focused specifically on the readiness for transition<sup>12</sup> or assessing the quality of interaction in service user/practitioner relationships<sup>13</sup>. The current evidence base does not suggest that one measure of transition might be more efficacious than another, however, in the mental healthcare setting it seems that certain components might be more useful than others. Some of the core components have been described and encompass measures that include the readiness, planning, transfer of care and transfer of completion<sup>17</sup>. The Transitions of Care from Child and

1  
2  
3 Adolescent Mental Health Services to Adult Mental Health Services (TRACK study)<sup>18,19</sup> noted  
4 that youth reaching the CAMHS transition boundary have variable outcomes, including  
5 inadequate transition procedures and disengagement from services. These factors can have a  
6 significant health economic impact on young people and their families<sup>20</sup>. Others have shown  
7 that transition should be both personalised and flexible, and crucially incorporate the  
8 perspectives of young people<sup>21</sup>.  
9

10 A mapping survey of 28 EU countries showed that the characteristics of CAMHS to AMHS  
11 transition services varies in terms of distribution of services, funding and user access<sup>22</sup>. This  
12 implies that not enough resources and funds have been allocated to prevent discontinuity of  
13 care at the transfer boundary and that disengagement from services may be a significant  
14 problem across the continent. Furthermore, whilst new national and international initiatives are  
15 clearly warranted, tools to inform decision-making at the transfer boundary and to enable  
16 reliable and consistent assessment of transition outcomes are also urgently needed. It is for this  
17 reason that a bespoke suite of measures, focusing on transition of young people from CAMHS  
18 to AHMS, was developed within the European Union (EU) funded Managing the Link and  
19 Strengthening Transition from Child to Adult Mental Health Care (MILESTONE) study<sup>23</sup>. The  
20 MILESTONE suite of measures comprises the Transition Readiness and Appropriateness  
21 Measure (TRAM), for assessing whether transition is appropriate for any young person who is  
22 approaching their transfer boundary in CAMHS, and whether they are ready for it, and the  
23 Transition Related Outcome Measure (TROM), which evaluates the outcomes of transition.  
24 The TRAM is currently being used within the MILESTONE cluster randomised controlled trial  
25 as one of the components of the MILESTONE study<sup>23</sup> to inform “Managed transition” in the  
26 intervention arm. The present paper presents the findings on the validation of the TRAM.  
27  
28  
29  
30  
31  
32  
33  
34  
35  
36  
37  
38  
39  
40  
41  
42  
43  
44  
45  
46  
47  
48  
49  
50  
51  
52  
53  
54  
55  
56  
57  
58  
59  
60



## Methods

The methods linked with the development and validation of the TRAM have been described previously<sup>24</sup>. Figure 1 summarises the main stages, methods and analyses; only the key points are mentioned here. The US FDA Guidance for Patient-reported Outcome Measures (PROM) was followed<sup>25</sup> by beginning with a literature review on transitioning, which was followed by an expert panel review, a focus group phase measure consisting of development and translation (so that the testing of the web-based versions could take place in the eight European Union countries participating in the MILESTONE study<sup>23</sup>), and finally a two-phase process. The first phase (MILESTONE validation study) involved 100 adolescents (pre-transition), young adults (post-transition), parents/carers and both CAMHS and AMHS clinicians and assessed content validity, construct validity and test-retest reliability. Participants completed the TRAM plus other existing measures (Figure 1). The second phase involved over 1000 young people as part of the MILESTONE cohort study and nested cluster randomised trial and assessed the responsiveness and interpretability of the TRAM and the psychometric properties (apart from test-retest). All study participants gave informed consent as per study guidelines. The MILESTONE study protocol was approved by the UK National Research Ethics Service (15/WM/0052). Ethics approval was also granted by the ethics boards in the different MILESTONE participating centres; for London, this was the NRES Committee London - Camberwell St Giles (reference: 14/LO/1049). Data collection was part of the MILESTONE study, which has been described elsewhere alongside a detailed summary of the measures that were completed by participants and subsequently used in the validation of the TRAM<sup>23</sup>.

Internal consistency of the TRAM was calculated by means of the Cronbach's alpha. The Pearson's product moment correlation between three existing measures (Health of the Nation Outcome Scale for Children and Adolescents [HoNOSCA]<sup>26,27</sup> scale, Clinical Global Impression Severity [CGI-S]<sup>28</sup> scale & Specific Levels of Functioning [SLOF] scale)<sup>29</sup> and the

1  
2  
3 new rating scales was calculated to assess whether the scores of the TRAM are related to scores  
4  
5 on other instruments. Factor analysis was conducted to determine the underlying structure of  
6  
7 the TRAM subscales and to identify patterns and characteristics of the factors. Results of the  
8  
9 second phase of validation will also be used to inform modifications to the scale, in particular  
10  
11 to improve the utility and accessibility of the measure and minimise completion burden.  
12  
13

14 To assess whether the demographic characteristics were related to the TRAM subscales we  
15  
16 estimated the deprivation index. The deprivation index was developed based on comparable  
17  
18 variables present in the Jarman Index that is a widely used indicator for social deprivation<sup>30,31</sup>.  
19  
20 In the context of the present study, the variables of the deprivation index were captured using  
21  
22 the sociodemographic variables in the Sociodemographic Interview for the Parent. The  
23  
24 following variables were used to estimate the deprivation index (a) employment of parents  
25  
26 versus unemployed, (b) if the young person was attending school or not, (c) lone parent, (d)  
27  
28 ethnic minority, (e) parental history of mental illness (f), socioeconomic factors i.e. receiving  
29  
30 state financial support and (g) level of parental education.  
31  
32  
33  
34  
35

### 36 **Patient and Public Involvement**

- 37  
38  
39  
40  
41  
42  
43  
44  
45  
46  
47  
48  
49  
50  
51  
52  
53  
54  
55  
56  
57  
58  
59  
60
- Patients were involved in the development of the TRAM by taking part in focus groups and to discuss important themes to be assessed by the TRAM, and by piloting the initial versions of the measure.
  - Participants of the main MILESTONE study were also patients and alongside their parents/carers also completed the TRAM as part of the study protocol.
  - After the last study contact with participants, study participants were informed of the webpage for the study, where links to all published findings and other relevant information would be published for their information.

## Results

### Development of the TRAM

#### *Literature review*

The detailed review of current literature and measures on transition in both mental and physical health resulted in a list of 64 items of potential importance, grouped into three main domains - diagnosis, risk and functioning - forming the core structure of the TRAM.

#### *Expert panel*

It was decided that the TRAM should include questions on potential barriers to a successful transition (e.g. young people not being able to act independently, not being motivated to manage their conditions or not understanding their conditions), as these reflect the young persons' readiness for and functioning related to transition. Furthermore, it was hoped that addressing such issues within the TRAM would emphasise the need for CAMHS and AMHS to work together before and/or during transition. The TRAM also considered the young person's desired level of parental involvement, the ease with which they formed clinical relationships and whether they were able to discuss their mental health history. These elements were also deemed relevant for services to understand to avoid difficult or tricky situations that may potentially derail transition.

#### *Focus groups*

Focus groups were held with young people with experience of CAMHS, parents and carers, CAMHS professionals and AMHS professionals. During the focus group discussions, young people voiced that 'life events' should be taken into account when deciding about transition. A large number of recent life events was thought to suggest a greater need for AMHS. This is an important point and emphasizes that during transfer, other factors such as life events alongside health transitions are one of several life transitions that need to be taken into consideration when developing readiness measures. Participants in the focus groups also identified the level

1  
2  
3 of external support as being an important consideration when making transition plans, as those  
4  
5 with less external support may have a greater need for continued statutory services. Young  
6  
7 people, parents and CAMHS clinicians ranked social support and housing as important more  
8  
9 often than the expert panel or AMHS clinicians. Poor engagement with tasks, lack of  
10  
11 meaningful occupation and cognitive factors were considered the least important factors to  
12  
13 consider when making a transition decision by all categories of participants. Questions relating  
14  
15 to these issues were therefore removed from subsequent versions of the scale.  
16  
17

### 18 19 ***Organisation of items within subscales***

20  
21 Once the final list of items had been decided, the organisation of these items was discussed  
22  
23 with further focus groups and the MILESTONE expert panel. Based on this feedback, the  
24  
25 preliminary version of the TRAM included domains A-F, which capture the ‘appropriateness’  
26  
27 of transition, and G and H, which capture ‘readiness’ for transition, as follows:  
28  
29

#### 30 31 (A) Symptoms

32  
33 Frequency and severity of symptoms to include depression, mania, anxiety, post-traumatic  
34  
35 stress, psychosis, personality disorder, antisocial personality disorder, attention deficit, social  
36  
37 communication, eating difficulties and other mental health conditions.  
38

#### 39 40 (B) Overall illness

41  
42 This considered severity, taking into account all symptoms across all existing conditions.  
43

#### 44 45 (C) Overall disruption

46  
47 Effect of symptoms on functioning with respect to self-care, sleep, household chores,  
48  
49 community, social, responsibility, relationships with family, friends/partner, peers/colleagues  
50  
51 and education/work performance.  
52

#### 53 54 (D) Risk factors

55  
56 Frequency and severity of stress, risk taking behaviour, self-harm (no suicidal intent), suicidal  
57  
58 thoughts, behaviours that risk harm to others and behaviours that risk harm from others.  
59  
60

1  
2  
3 (E) Factors affecting symptoms  
4

5 Including need for ongoing treatment, inpatient admissions, relapse, side effects to medication,  
6  
7 physical health comorbidities and drug and alcohol abuse.  
8

9  
10 (F) Health system factors  
11

12 The health system factors that may affect a clinicians' transition decision include items such as  
13 financial implications of a transition to AMHS, the quality of the links between CAMHS and  
14 AMHS, the appropriateness of available statutory services, the availability of alternative  
15 services and the skills of local GPs with regard to mental health when treating a young person's  
16 condition.  
17  
18  
19  
20  
21  
22

23  
24 (G) Barriers to functioning  
25

26 Including inability to act independently, poor understanding of condition, lack of knowledge  
27 on how to access services, lack of motivation, poor adherence to medication, lack of social  
28 support, not wanting carers to be involved, difficulty forming relationships with treatment team  
29 and difficulty repeating mental health history.  
30  
31  
32  
33

34  
35 (H) Other life changes  
36

37 Other life changes (positive or negative) relating to family relationships, relationships with  
38 friends and partner, moving home, school/college/work, illness/death, police involvement,  
39 pregnancy and other.  
40  
41  
42  
43

44 Both the frequency of symptoms and the severity of impairment (A [symptoms] and D [risk])  
45 were assessed, as advised by focus groups participants. Again, following participant feedback,  
46 the severity of each symptom was recorded separately but a single assessment of impairment  
47 was made across all symptoms and conditions. Focus group participants also considered which  
48 options for assessing frequency and severity would be most appropriate. For frequency, the  
49 most popular choice was a 6-point ordinal scale (from not experienced in the past 6 months  
50 ranging to all of the time) and for severity, a 5-point ordinal scale (from very mild ranging to  
51  
52  
53  
54  
55  
56  
57  
58  
59  
60

1  
2  
3 very severe). Unduly convoluted medical language was removed, and participants reported no  
4 major issues with completion of the scale. Experts in the field were asked to review the  
5 proposed scale. The agreed test version was translated into Croatian, Dutch, French, German,  
6 and Italian using a back-translation process<sup>32</sup> and, after final checks, uploaded on the  
7 HealthTracker™ system, a web-based portal for online measures.  
8  
9  
10  
11  
12  
13  
14  
15  
16  
17  
18  
19  
20  
21  
22  
23  
24  
25  
26  
27  
28  
29  
30  
31  
32  
33  
34  
35  
36  
37  
38  
39  
40  
41  
42  
43  
44  
45  
46  
47  
48  
49  
50  
51  
52  
53  
54  
55  
56  
57  
58  
59  
60

For peer review only

## **Validation of the TRAM**

In the first phase, the three versions of the TRAM were completed by a total of 36 adolescents (AD), 29 parents/carers (PC) and 35 clinicians (CL) respectively.

In the main MILESTONE study (second phase), the TRAM was completed by a total of 932 AD, 752 PC and 849 CL.

### ***First Phase***

#### **Test-retest Reliability**

In order to assess test-retest reliability, Pearson's correlation coefficients were calculated between responses per the first and subsequent completion (a maximum of 41 days after the first assessment) for each sub-scale and version (AD, PC, CL) of TRAM. There were 36 AD, 29 PC and 35 CL completed TRAM's available for the test-retest reliability analysis. The results are summarised in Table 1 A and B. There was moderate ( $> 0.5$ ) correlation<sup>33</sup> between test-retest scores for all versions (AD, PC, CL) and all sub-scales.

### ***Second Phase***

Demographics for the adolescent (AD), parent/carer (PC) and clinician (CL) sample are presented in Supplementary Information Tables 1 and 2. The psychometric properties of the AD, PC and CL versions of the TRAM and all sub-scales for the larger sample are described in the next section.

#### **Internal Consistency (Reliability)**

Cronbach's alpha was calculated for all versions of the TRAM (AD, PC, and CL versions) for the following sub-scales; Symptoms, Overall disruption, Barriers to functioning, Risk factors and Factors affecting symptoms. Alpha ( $\alpha \geq 0.70$ ) is considered acceptable evidence of internal reliability<sup>34</sup>. The consistency of responses between versions (AD, PC and CL) was assessed using Pearson's correlation coefficient. The internal consistency of the symptoms sub-scale was shown to be high for the AD version ( $\alpha = 0.804$ ), acceptable for the PC version ( $\alpha = 0.759$ )

1  
2  
3 and moderate for the CL version ( $\alpha = 0.552$ ). The AD version for symptoms moderately  
4 correlated with the PC and CL version of the symptom sub-scale ( $r = 0.517, p < 0.01$  and  $r =$   
5  $0.396, p < 0.01$ , respectively). Additionally, the PC version and CL version of the symptom  
6 sub-scale also revealed a moderate correlation ( $r = 0.393, p < 0.01$ ). The overall disruption  
7 subscale demonstrated high levels of internal consistency for all versions of the scale (AD  
8 version,  $\alpha = 0.869$ ; PC version,  $\alpha = 0.882$ , CL version,  $\alpha = 0.877$ ). The AD version for overall  
9 disruptions correlated with the PC and CL version of the overall disruption sub-scale ( $r = 0.420,$   
10  $p < 0.01$  and  $r = 0.380, p < 0.01$ , respectively). Furthermore, the PC version and CL version of  
11 the overall disruption sub-scale also revealed a moderate correlation ( $r = 0.505, p < 0.01$ ).

12  
13  
14  
15  
16  
17  
18  
19  
20  
21  
22  
23  
24  
25  
26  
27  
28  
29  
30  
31  
32  
33  
34  
35  
36  
37  
38  
39  
40  
41  
42  
43  
44  
45  
46  
47  
48  
49  
50  
51  
52  
53  
54  
55  
56  
57  
58  
59  
60  
The barriers to functioning sub-scale scored adequate reliability for the PC and CL versions ( $\alpha$   
= 0.725 and 0.714, respectively) with the AD version demonstrating slightly lower consistency  
( $\alpha = 0.616$ ). The AD version for barriers to functioning sub-scale moderately correlated with  
the PC and CL version of the overall disruption sub-scale ( $r = 0.327, p < 0.01$  and  $r = 0.401, p$   
< 0.01, respectively). Furthermore, the PC and CL version of the barriers to functioning sub-  
scale also revealed a moderate correlation ( $r = 0.380, p < 0.01$ ).

The risk factors sub-scale achieved adequate levels of internal consistency for the AD version  
( $\alpha = 0.735$ ), with the PC and CL versions revealing slightly lower consistency ( $\alpha = 0.654$  and  
0.684, respectively). Once again, the AD version for risk moderately correlated with the PC  
and CL version of the risk sub-scale ( $r = 0.552, p < 0.01$  and  $r = 0.557, p < 0.01$ , respectively).  
Similarly, the PC version and CL version of the risk sub-scale also revealed a moderate  
correlation ( $r = 0.529, p < 0.01$ ).

The factors affecting symptoms sub-scale did not exceed a Cronbach's alpha of 0.70 for all  
versions (AD version  $\alpha = 0.554$ , PC version  $\alpha = 0.565$ , CL version  $\alpha = 0.522$ ), with the AD  
version of the factors affecting symptoms sub-scale moderately correlating with the PC and CL  
version ( $r = 0.610, p < 0.01$  and  $r = 0.389, p < 0.01$ , respectively). This relationship was also



1  
2  
3 seen for the PC and CL versions of the factors affecting symptoms sub-scale ( $r = 0.452, p <$   
4  
5 0.01).

6  
7  
8 The performance of the symptoms sub-scale for CL and the Factors Affecting Symptoms sub-  
9  
10 scale for AD, PC and CL, fell below the minimum acceptable threshold. We therefore explored  
11  
12 whether deletion of particular items might improve this and found that by removing the item  
13  
14 relating to “Attention deficit” from the CL Symptoms sub-scale, would increase to 0.587. We  
15  
16 also found that removing the item about “Medical comorbidity” from the Factors Affecting  
17  
18 Symptoms sub-scale (AD, PC, CL), reliability would increase to 0.573 for the AD, 0.593 for  
19  
20 the PC and 0.548 for the CL. Consequently, they were retained in the TRAM.  
21  
22

### 23 24 Correlations with other existing measures

25  
26 To assess whether the TRAM could conceptually overlap with other existing instruments also  
27  
28 completed by MILESTONE participants, the Pearson’s product moment correlation coefficient  
29  
30 was calculated between each TRAM subscale and the gold standard HoNOSCA<sup>26,27</sup> and the  
31  
32 CGI-S<sup>28</sup> (Table 2). The Pearson’s product moment correlation coefficients for the TRAM sub-  
33  
34 scales with HoNOSCA and CGI scales showed moderate correlations. Apart from the CGI  
35  
36 (clinician version) for the symptoms and overall disruption, the correlation coefficients were  
37  
38 all low ( $<.500$ ) suggesting a modest relationship between the TRAM sub-scale and HoNOSCA  
39  
40 and CGI-S scores.  
41  
42  
43  
44

45  
46 Pearson’s correlations were also determined between each TRAM subscale and the parent  
47  
48 version of a behavioural rating scale: SLOF. The SLOF allows the capture of symptomatology  
49  
50 using observable behavioural function in those with psychiatric illness<sup>29</sup>. The subscale scores  
51  
52 of the TRAM were analyzed to see how well they correlate with the SLOF scale (AD, PC and  
53  
54 CL) (Table 3). The Pearson’s correlation between the TRAM sub-scales and SLOF Subscales  
55  
56 showed moderate associations. However, while the HoNOSCA and CGI showed significant  
57  
58 correlations with the TRAM scales, albeit moderate relationships, the SLOF scale revealed  
59  
60

1  
2  
3 poor relationships (non-significant correlations) between some constructs measured by the  
4 former two scales.  
5  
6

### 7 8 Exploratory Factor Analysis 9

10 Exploratory factor analysis (EFA) (principal axis, Promax rotation) was undertaken to model  
11 the interrelationships between the items in the TRAM and was performed on the adolescent  
12 version of the TRAM's sub-scales. The TRAM was developed to assess whether transition is  
13 appropriate and whether the young person is ready for it. Based on this premise, the adolescent  
14 version of the scale was chosen as it was deemed to be the most relevant version clinically to  
15 explore the interrelationship between the items.  
16  
17

18 The first set of EFAs was performed without a set number of factors, these analyses showed  
19 that for 'symptoms' and 'factors affecting symptoms' sub-scales a two factors model in line  
20 with the clinical knowledge can explain the relationship between the items of the sub-scales  
21 (see Table 4 for the details of the factors). These analyses, however, did not produce meaningful  
22 models for the 'overall disruption', 'risk factors' and the 'barriers to functioning' sub-scales.  
23 Therefore, another set of EFAs were performed where the number of factors were set on two  
24 for the 'overall disruption', 'risk factors' and three for 'barriers to functioning' sub-scales.  
25 These EFAs returned for all the three sub-scales models which satisfy both statistical and  
26 clinical criteria. In the 'barriers to functioning' subscale, the three factors were identified based  
27 on clinical knowledge of barriers that might impede functioning such as 'Patient Factors',  
28 'Family Support', and 'Treatment'. Table 4 summarises the results of EFAs for the TRAM  
29 subscales. For all the sub-scales and the items were clustered based on clinical relevance.  
30  
31  
32  
33  
34  
35  
36  
37  
38  
39  
40  
41  
42  
43  
44  
45  
46  
47  
48  
49  
50

### 51 Deprivation Index 52

53 An approximate measure of deprivation was estimated by creating the Deprivation Index. The  
54 deprivation index correlations with the overall TRAM subscale scores in the AD, PC and CL  
55 version are shown in Table 5. The deprivation index correlated significantly with the AD, PC  
56  
57  
58  
59  
60

1  
2  
3 and CL versions of the Overall Disruption Subscale. Pearson correlations were significant for  
4  
5 the PC and CL version but not the AD version of the Symptoms and Risk factors subscale.  
6  
7  
8  
9  
10  
11  
12  
13  
14  
15  
16  
17  
18  
19  
20  
21  
22  
23  
24  
25  
26  
27  
28  
29  
30  
31  
32  
33  
34  
35  
36  
37  
38  
39  
40  
41  
42  
43  
44  
45  
46  
47  
48  
49  
50  
51  
52  
53  
54  
55  
56  
57  
58  
59  
60

For peer review only

## Discussion

This current manuscript reports on the development and validation of the Transition Readiness and Appropriateness Measure (TRAM). The TRAM was designed and worded specifically so that it can be completed online, optimising both completion time and accessibility; thus, increasing its potential applicability in an adolescent/young adult population. The benefit of following the rigorous FDA process while developing TRAM was that feedback on potential items was gained early on from end users. Importantly, items such as diagnosis, risk and functioning were identified as important items in the transition decision-making process. The psychometric analyses revealed that the TRAM is a reliable and valid instrument for assessing transition. The TRAM had good reliability for all versions and showed moderate to low correlations when pitted with other established instruments. This finding supports the use of TRAM to assess transition readiness, as higher correlations would imply that the TRAM was not adding anything new when compared to existing measures such as HoNOSCA. The goal of the TRAM to assess readiness and appropriateness were met because the TRAM was holistic in its scope to explore the key items that captured the overarching themes relating to transition readiness and appropriateness.

When looking more closely at the correlations of the TRAM, there were conceptual differences between the TRAM subscales and existing instruments. Regarding the HoNOSCA, the Pearson's correlations were all below .500 for the different versions suggesting a modest relationship between the HoNOSCA total score and TRAM subscale scores. Previous studies that have assessed the correlations between the HoNOSCA total score and other instruments such as the parent & clinician rated Children's Global Assessment Scale<sup>35</sup> and the Global Assessment of Psychosocial Disability<sup>36</sup> have reported moderate correlations ranging from of 0.4 to 0.6. The present study also reported modest correlations between the TRAM subscale and HoNOSCA total scores suggesting that conceptually the instruments measure different

1  
2  
3 elements of transition. A similar reasoning can be put forward when examining the TRAMs  
4 performance with the CGI. The CGI considers aspects of three different global measures (i)  
5 severity of illness (CGI-S), (ii) global improvement and (iii) efficacy index<sup>28</sup>. In the context of  
6 this study, the CGI-S was considered and embodies all the aspects regarding the overall severity  
7 of symptoms of the young person into a single score. In comparison, the TRAM sub-scales are  
8 more specific. The sub-scales of the SLOF make it conceptually closer to the TRAM in terms  
9 of looking at the functioning aspects of transition when compared to the HoNOSCA or CGI-I.  
10 Although there was not a complete overlap, it was easier to classify individual correlations  
11 based on their meaningfulness. As expected, there were poor correlations (not significant) that  
12 can be explained by a conceptual difference between the construct measured by SLOF (that  
13 does not specifically focus on transition readiness) and TRAM sub-scales.  
14

15 From a clinical viewpoint, the EFA for the adolescent version showed that a two factors model  
16 was the most suitable for the ‘symptoms’, ‘overall disruption’, ‘risk factors’ and ‘factors  
17 affecting symptoms’ TRAM subscale. The items were grouped together based on clinical  
18 judgement, for example, in the ‘symptoms’ subscale the items anxiety and depression were  
19 grouped together in factor 1 while antisocial behaviour and mania were categorised together in  
20 factor 2. In some instances, however, some items had lower loading values. The item ‘other  
21 mental health’ had a loading score of 0.186 in the ‘symptoms’ subscale suggesting a weaker  
22 association in comparison to the other items in this subscale. There is, however, no rule of  
23 thumb regarding the optimal strength of factor loadings and thresholds. Indeed, one  
24 meta-analysis of the variance in factor loading has shown that there is no agreement to what  
25 constituents a high or low factor loading<sup>37</sup>. The items anxiety and depression clustered together  
26 with factor loading scores greater than 0.7 reflecting a higher degree of impact these items have  
27 when a young person prepares for transition. Similarly, in the ‘risk factors’ subscale the items  
28 ‘suicidal thoughts behaviours’ and ‘self-harming behaviours’ had the highest factor loading  
29  
30  
31  
32  
33  
34  
35  
36  
37  
38  
39  
40  
41  
42  
43  
44  
45  
46  
47  
48  
49  
50  
51  
52  
53  
54  
55  
56  
57  
58  
59  
60

1  
2  
3 scores in comparison to the other items indicating that when it comes to risk and how it impacts  
4  
5 on the preparedness of when a young person's transition, suicidal thoughts and self-harming  
6  
7 behaviours are two elements that can have a significant impact on how a young person  
8  
9 navigates transition. The barriers to functioning subscale revealed a three-factor model. On  
10  
11 closer examination, while five items clustered together in factor 1, the item 'knowledge of  
12  
13 accessing services' had the highest factor loading score in this factor. Interestingly, this score  
14  
15 was higher than the 'ability to act independently' score. This observation suggests that when it  
16  
17 comes to examine the barriers of transition, knowledge of accessing services are more  
18  
19 important than whether the young person has the ability to act independently or understands  
20  
21 the degree of how the severity of their mental illness will impact on the transition process. This  
22  
23 point is echoed in the literature and supports the overarching theme voiced by young people  
24  
25 and others that transition from CAMHS to AMHS should be individualised and be flexible  
26  
27 enough to manage the obstacles encountered during the transition process<sup>17,21,22,38</sup>. Despite this,  
28  
29 the ability to act independently should not be understated. Young people will have different  
30  
31 developmental milestones during their transition journey. This is particularly important during  
32  
33 the latter stages of transition which often takes place in young adulthood as the brain is still  
34  
35 developing. From a neurodevelopmental perspective this point should not be taken lightly by  
36  
37 services who sometimes forget that even at this stage of the transition process they are dealing  
38  
39 with developing young people. Overall, these findings showed that the items could be mapped  
40  
41 onto readiness and appropriateness. This will form the basis of a transition passport that will  
42  
43 assist in the identification of high-risk cases or those who can be appropriately discharged or  
44  
45 transitioned to another community service. The transition passport will be described elsewhere.  
46  
47  
48  
49  
50  
51  
52  
53

54 The study was able to estimate a deprivation index based on sociodemographic  
55  
56 variables captured as part of the MILESTONE study and showed a significant relationship with  
57  
58 the 'Overall Disruption Subscale' in all versions of the scale, and the Parent and Clinician  
59  
60

1  
2  
3 version of the ‘Symptoms’ and ‘Risk Factors’ Subscale. This is not surprising as these  
4 subscales have items grouped according to relationships, internalising/externalising symptoms  
5 and risk and these factors would be related to the sociodemographic aspects assessed using the  
6 deprivation index. While there are several indices that can be used for outcome services, the  
7 Jarman Index can be used as a proxy for deprivation and while some evidence has shown that  
8 it might not be entirely suited to the planning of healthcare outcomes<sup>39</sup>, we have used elements  
9 of it to estimate a deprivation index that showed significant inter-relationships with TRAM  
10 subscales.  
11  
12  
13  
14  
15  
16  
17  
18  
19  
20

### 21 **Strengths and limitations**

22  
23 The TRAM has a dual purpose: To identify who should be transitioned to adult mental health  
24 services and to pinpoint areas which should be considered or addressed to ensure that the  
25 transition process is smooth. The barriers to a successful transition are areas which clinicians  
26 on both sides of the transfer boundary can work on to improve the ease of transition. These  
27 barriers include young people not being ready to act as an independent adult; young people not  
28 understanding their mental health condition or not being motivated to manage their condition;  
29 not having social support, not easily building therapeutic relationships and not easily being able  
30 to repeat history. The TRAM score summary report contains the TRAM responses of the YP,  
31 PC and CL, presented in visually attractive graphs and tables, and serves as a clinician decision  
32 support tool and communication aid. Yellow highlights help clinicians focus on items requiring  
33 attention. If a referral to adult services seems appropriate for the young person but barriers are  
34 highlighted, the clinician can add these to the care plan and address them in a timely fashion to  
35 help smoothen the transition process. Moving forward, based on the TRAM validation study  
36 findings, a MILESTONE Transition Predictor will be developed on the HealthTracker™  
37 platform, to be used in association with the TROM. As transition is dependent on symptoms  
38 clusters, the Transition Predictor will be able to provide a personalised transition approach  
39  
40  
41  
42  
43  
44  
45  
46  
47  
48  
49  
50  
51  
52  
53  
54  
55  
56  
57  
58  
59  
60

1  
2  
3 depending on symptom profiling. This will involve using a traffic light scoring system to a  
4  
5 modified TRAM score summary report to predict the outcome of transition based on symptom  
6  
7 profiling. Together with the TROM, these clinical decision-making tools will be valuable in  
8  
9 identifying cases who need to transition based on symptomatology and then to assess the  
10  
11 outcomes of the transition process. Young person's undergoing transition present with complex  
12  
13 psychopathology and as such those participants who were the most severely ill or less engaged  
14  
15 with the transition process are least likely to have responded. The present study was also unable  
16  
17 to assess transition readiness and how it can evolve over across time. This would be important  
18  
19 given that young people are likely to have several transitions during their transition journey.  
20  
21 Future work would need to explore the longitudinal monitoring of transition readiness in young  
22  
23 people during their transition journey.  
24  
25  
26  
27

## 28 **Conclusion**

29  
30 The current study suggests that the TRAM is a viable instrument for determining the readiness  
31  
32 of a young person and the appropriateness for transition from CAMHS. It is holistic in its scope  
33  
34 to ensure that the young person is seen as more than a list of symptoms and assessment involves  
35  
36 not only clinicians but also young people and their parents/carers. Being web-based allows the  
37  
38 measure to be used across countries by end users and enriches the transition process from  
39  
40 CAMHS to AMHS. This means that the TRAM has the potential to be used worldwide by end  
41  
42 users thereby contributing to a smoother transition process and allowing for personalised  
43  
44 mental health care. Ultimately this will have added value in informing the transition process  
45  
46 from CAMHS to AMHS. The TRAM is designed to work in conjunction with an instrument  
47  
48 that examines the outcome of transition.  
49  
50  
51  
52  
53  
54  
55  
56  
57  
58  
59  
60



## Funding

Funding for the MILESTONE project was given by the EU Seventh Framework Programme (grant number: 602442).

## Author Contributions

PS is the Principal Investigator; JS, HT and JW wrote the manuscript and alongside SG, ND and KDC assisted in revising the subsequent versions. NH, IS, MM, AP, EG, LM, GS, GA, FM, FR, VS and RA recruited subjects and were involved in data collection/management. LA, KL, HT and PT were involved in recruitment and the focus groups. FF was responsible for the data management component and subsequent analyses for the validation. SPS is the Chief Investigator of the MILESTONE project and obtained funding together with AM, CS, DP-O, DW, FCV, FM, GCD, GDG, JM, MP, PS, ST, TF and US. AW, AT and CG served as young project advisors and helped with the development of the TRAM. All authors critically reviewed the protocol and the manuscript and gave approval for the publication.

## Acknowledgements

### **The MILESTONE consortium: members and partner institutions:**

Swaran Singh, Helena Tuomainen, Jason Madan, Jane Warwick, Cathy Street, Dieter Wolke, Moli Paul, Claire Daffern, Priya Tah, Rebecca Appleton, Alastair Canaway, James Griffin, Philip Wells, Rose-Marie Lomax (University of Warwick, UK), Giovanni de Girolamo, Giulia Signorini, Alessandro Ferrari, Cecilia Ferrari, Laura Rivolta, Flavia Levi, Lidia Manenti, Eliza Gheza, Adriana Pastore, Maria Cataldo, Giorgia Morini, Cecilia Toselli, Pamela Stagni, Pamela Varvara (IRCCS Istituto Centro San Giovanni di Dio Fatebenefratelli, Brescia, Italy), Giovanni Allibrio, (ASST of Spedali Civili, Brescia, Italy), Ottaviano Martinelli (ASST Lecco, Italy), Patrizia Conti (ASST Lariana), Emiliano Monzani (Niguarda Metropolitan Great Hospital, Italy), Francesco Rinaldi (ASST of Valcamonica, Italy), Francesco Margari, Lucia Margari (University of Bari, Italy), Paola Stagi, Fabrizio Starace (Modena, Italy), Giuseppe Carrà (San Gerardo Hospital, Italy), Renata Nacinovic (ASST Monza, Italy), Paolo Scocco, Michela Gatta (DISM, Italy), Fabio Vanni, Sabrina Ferrari (AUSL of Parma, Italy), Marco Armando (Child Neuropsychiatric Unit, Department of Neuroscience, Bambino Gesù Children's Hospital, IRCCS, Rome, Italy; Department of Psychiatry of the University of

1  
2  
3 Geneva, Switzerland), Stefano Vicari (Child Neuropsychiatric Unit, Department of  
4 Neuroscience, Bambino Gesù Children's Hospital, IRCCS, Rome, Italy), Angelo Bertani  
5 (ASST Santi Paolo e Carlo, Italy), Edda Zanetti (ASST Spedali Civili, Brescia, Italy), Paramala  
6 Santosh, Leighton McFadden, Natalie Heaney, Mathilde Mastroianni, Federico Fiori, Jatinder  
7 Singh, Ilyas Sagar-Ouriaghi, Cassandra Deane (Kings College London, UK), Laura Adams  
8 (Plymouth University, UK), Diane Purper-Ouakil, Frédérick Russet, Virginie Maurice,  
9 Véronique Humbertclaude (Hôpital Saint Eloi, France), Renaud Jardri, Aesa Parenti (Centre  
10 Hospitalier Universitaire de Lille, France), David Da Fonseca, Isabelle Charvin (Centre  
11 Hospitalier Universitaire de Marseille, France), Frédérique Bonnet-Brilhault, Chrystèle Bodier,  
12 Catherine Prigent (Centre Hospitalier Universitaire de Tours, France), Mario Speranza, Hélène  
13 Lida-Pulik (CH Versailles, France), Athanasios Maras, Larissa van Bodegom, Mathilde  
14 Overbeek, Esther Kooymans, Iris Link (Yulius Academie, the Netherlands), Ulrike Schulze,  
15 Melanie Saam, Ulrike Breuninger, Jörg Fegert, Sonja Aslan, Sarah Miller (University of Ulm,  
16 Germany), Renate Schepker, Beata Williams, Anne Sartor, Elena Tanase (ZfP  
17 Südwürttemberg, Germany), Nichele Noterdaeme, Vehbi Sakar, Carolin von Bentzel  
18 (Josefinum Augsburg, Germany), Sabine Tremmery, Gaëlle Hendrickx, Veronique De Roeck  
19 (KU Leuven, Belgium), Fiona McNicholas, Lesley O'Hara, Rachael McKenna, Aleksandra  
20 Gronostaj, Ingrid Holme (University College Dublin, Ireland), Tomislav Franić, Nikolina  
21 Davidović (University Hospital Split, Croatia), Vlatka Kovač, Katarina Dodig-Ćurković  
22 (University of Osijek, Croatia), Frank Verhulst, Gwen Dieleman, Suzanne Gerritsen (Erasmus  
23 MC, The Netherlands), Kate Lievesley, Helen Furse, Paulina Nikolova, Todor Mutafov, Ivo  
24 Viliev, Vasil Dimov (HealthTracker, UK), Amanda Tuffrey, Anna Wilson, Charlotte Gatherer,  
25 Leanne Walker, Sarah Buttle, Caoimhe Kelly, Meghan Killilea, James Kirwan, Courtney  
26 Smyth, (Young project advisors affiliated with University of Warwick), Andrea Wohner  
27 (concentris research management GmbH, Germany), Nigel Jeffery, Suhas Hydros (Croydon  
28 CAMHS, UK), Richard Church (Lambeth CAMHS, UK), Omer Moghraby (Lewisham  
29 CAMHS, UK); Partha Banerjea (Southwark CAMHS, UK), Genevieve Riley, Pablo Ronzini,  
30 Rosemary Richards (2Gether NHS Foundation Trust, UK), Jo Berriman (South Staffordshire  
31 and Shropshire Healthcare NHS Foundation Trust SSSFT, UK), Vinuthna Pemmaraju (The  
32 Black Country Partnership Foundation NHS Trust, UK), Michael Slowik (Dudley and Walsall  
33 Mental Health Partnership NHS Trust, UK), Ben Rogers, Alan Farmer (Worcestershire Health  
34 and Care NHS Trust, UK), Ashley Liew, Tanveer Sandhu (Birmingham Children's Hospital,  
35 UK).

1  
2  
3 We extend our thanks and appreciation to the MILESTONE project consortium for their  
4 contribution.  
5  
6  
7

8 This project has received funding from the European Seventh Framework Programme for  
9 research, technological development and demonstration under grant agreement no 602442.  
10 This paper reflects only the author's views and the European Union is not liable for any use  
11 that may be made of the information contained therein.  
12  
13  
14  
15  
16  
17

### 18 **Conflicts of Interest**

19  
20 PS is the co-inventor of the HealthTracker™ and is the Chief Executive Officer and  
21 shareholder in HealthTracker Ltd. FF is a Chief Technical Officer and KL is a Project Manager  
22 employed by HealthTracker Ltd respectively.  
23  
24  
25  
26

27 FCV is the Dutch distributor of ASEBA from which he receives remuneration.  
28

29 SPS is part-funded by the National Institute for Health Research (NIHR) Collaboration for  
30 Leadership in Applied Health Research and Care WM (NIHR CLAHRC WM).  
31  
32  
33  
34

### 35 **Data availability statement**

36  
37 Reasonable requests from individuals who wish to access the data can be done so by contacting  
38 the corresponding author.  
39  
40  
41  
42  
43  
44  
45  
46  
47  
48  
49  
50  
51  
52  
53  
54  
55  
56  
57  
58  
59  
60

## References

1. While A, Forbes A, Ullman R, et al. (2004). Good practices that address continuity during transition from child to adult care: syntheses of the evidence. *Child: Care, Health and Development*. 30: 439–452.
2. Department of Health (2015). *Future in mind: promoting, protecting and improving our children and young people's mental health and wellbeing*. London: Department of Health Children and Young People's Mental Health Taskforce.
3. Signorini G, Singh SP, Boricevic Marsanic V, et al. (2018). The interface between child/adolescent and adult mental health services: results from a European 28-country survey. *Eur Child Adolesc Psychiatry*. 27: 501-511.
4. Steinkamp G, Ullrich G, Muller C. et al. (2001). Transition of adult patients with cystic fibrosis from paediatric to adult care: the patients' perspective before and after start-up of an adult clinic. *Eur. J. Med. Res*. 6: 85–92.
5. Shaw KL, Southwood TR, McDonagh JE. (2004). Users' perspectives of transitional care for adolescents with juvenile idiopathic arthritis. *Rheumatology*. 43: 770–778.
6. McDonagh JE, Southwood TR, Shaw KL. (2006). Growing up and moving on in rheumatology: development and preliminary evaluation of a transitional care programme for a multicentre cohort of adolescents with juvenile idiopathic arthritis. *J. Child Health Care*. 10: 22–42.
7. Zhang L, Ho J, Kennedy S. (2014). A systematic review of the psychometric properties of transition readiness assessment tools in adolescents with chronic disease. *BMC Pediatr*. 14: 4.
8. Lotstein DS, McPherson M, Strickland B, Newacheck PW. (2005). Transition planning for youth with special healthcare needs: results from the national survey of children with special health care needs. *Pediatrics* 115: 1562–1568.

- 1  
2  
3 9. Sawicki G, Lukens-Bull K. et al. (2011). Measuring the transition readiness of youth with  
4 special healthcare needs: validation of the TRAQ-Transition Readiness Assessment  
5 Questionnaire. *J. Pediatr. Psychol.* 10: 160–171.  
6  
7
- 8  
9  
10 10. Donahue SA, Manuel JI, Herman DB. et al. (2012). Development and use of a transition  
11 readiness scale to help manage ACT team capacity. *Psychiatr. Serv.* 63: 223-229.  
12  
13
- 14 11. Ferris ME, Harward DH, Bickford K. et al. (2012). A clinical tool to measure the  
15 components of health-care transition from paediatric care to adult care: the UNC  
16 TR(x)ANSITION scale. *Ren. Fail.* 34: 744-753.  
17  
18
- 19 12. van Staa A, van der Stege HA, Jedeloo S. et al. (2011). Readiness to transfer to adult care  
20 of adolescents with chronic conditions: exploration of associated factors. *J. Adolesc. Health.*  
21 48: 295-302.  
22  
23
- 24 13. Ware NC, Dickey B, Tugenberg T. et al. (2003). CONNECT: a measure of continuity of  
25 care in mental health services. *Ment. Health Serv. Res.* 4: 209-221.  
26  
27
- 28 14. Hadjistavropoulos H, Biem H, Sharpe D. et al. (2008). Patient perceptions of hospital  
29 discharge: reliability and validity of a Patient Continuity of Care Questionnaire. *Int. J. Qual.*  
30 *Health Care.* 20: 314-223.  
31  
32
- 33 15. Durbin J, Goering P, Streiner DL. et al. (2004). Continuity of care: validation of a new self-  
34 report measure for individuals using mental health services. *J. Behav. Health Serv. Res.* 31:  
35 279-296.  
36  
37
- 38 16. Schwartz LA, Daniel LC, Brumley LD. et al. (2014). Measures of readiness to transition to  
39 adult health care for youth with chronic physical health conditions: a systematic review and  
40 recommendations for measurement testing and development. *J. Pediatr. Psychol.* 39: 588-601.  
41  
42
- 43 17. Cleverley K, Rowland E, Bennett K, Jeffs L, Gore D. (2018). Identifying core components  
44 and indicators of successful transitions from child to adult mental health services: a scoping  
45 review. *Eur Child Adolesc Psychiatry.* 2018 Oct 8  
46  
47  
48  
49  
50  
51  
52  
53  
54  
55  
56  
57  
58  
59  
60

- 1  
2  
3 18. Singh SP, Paul M, Ford T. et al. (2008). Transitions of care from child and adolescent  
4 mental health services to adult mental health services (TRACK study): a study of protocols in  
5 Greater London. *BMC Health Services Research*. 8, 1-7.  
6  
7  
8  
9  
10 19. Islam Z, Ford T, Kramer T, et al. (2016). Mind how you cross the gap! Outcomes for young  
11 people who failed to make the transition from child to adult services: the TRACK study.  
12 *BJPsych. Bull*. 40, 142-148.  
13  
14  
15  
16 20. Barr NG, Longo CJ, Embrett MG. et al. (2017). The transition from youth to adult mental  
17 health services and the economic impact on youth and their families. *Health Manage Forum*.  
18 30: 283-288.  
19  
20  
21  
22  
23 21. Broad KL, Sandhu VK, Sunderji N, Charach A. (2017). Youth experiences of transition  
24 from child mental health services to adult mental health services: a qualitative thematic  
25 synthesis. *BMC Psychiatry*. 17(1): 380.  
26  
27  
28  
29  
30 22. Signorini G, Singh SP, Marsanic VB. et al. (2017). Architecture and functioning of child  
31 and adolescent mental health services: a 28-country survey in Europe. *Lancet Psychiatry*.  
32 4(9):715-724.  
33  
34  
35  
36  
37 23. Singh SP, Tuomainen H, Girolamo G. et al. (2017). Protocol for a cohort study of  
38 adolescent mental health service users with a nested cluster randomised controlled trial to  
39 assess the clinical and cost-effectiveness of managed transition in improving transitions from  
40 child to adult mental health services (the MILESTONE study). *BMJ Open*. 7(10): e016055.  
41  
42  
43  
44  
45 24. Santosh P, et al. (2019). Protocol for the development and validation procedure of the  
46 Managing the Link and Strengthening Transition from Child to Adult Mental Health Care  
47 (MILESTONE) Suite of Measures. (manuscript in submission).  
48  
49  
50  
51  
52  
53 25. US Department of Health and Human Services Food and Drug Administration. (2009).  
54 Guidance for industry: patient-reported outcome measures: use in medical product  
55  
56  
57  
58  
59  
60

1  
2  
3 development to support labeling claims. Secondary Guidance for industry: patient-reported  
4  
5 outcome measures: use in medical product development to support labeling claims.  
6

7  
8 26. Gowers SG, Harrington RC, Whitton A, et al. (1999). Brief scale for measuring the  
9  
10 outcomes of emotional and behavioural disorders in children. Health of the Nation Outcome  
11  
12 Scales for children and Adolescents (HoNOSCA). Br. J. Psychiatry 174: 413–416.  
13

14  
15 27. Garralda ME, Yates P, Higginson I. (2000). Child and adolescent mental health service use.  
16  
17 HoNOSCA as an outcome measure. Br. J. Psychiatry. 177: 52–58.  
18

19  
20 28. Guy W. In: Handbook of Psychiatric Measures. Rush AJ, editor. Washington, DC:  
21  
22 American Psychiatric Association; 2000. Clinical Global Impressions Scale (CGI) pp. 100–  
23  
24 102  
25

26  
27 29. Schneider LC, Struening EL. (1983). SLOF: a behavioral rating scale for assessing the  
28  
29 mentally ill. Soc. Work Res Abstr. 19(3):9-21.  
30

31  
32 30. Jarman B. (1983) Identification of underprivileged areas. Br. Med. J. (Clin Res Ed). 286:  
33  
34 1705-1709.  
35

36  
37 31. Jarman 'B. (1984) Underprivileged areas: validation and distribution of scores. Br. Med. J.  
38  
39 289: 1587-1592.  
40

41  
42 32. Wild D, Grove A, Martin M, Eremenco S, McElroy S, Verjee-Lorenz A, Erikson P; ISPOR  
43  
44 Task Force for Translation and Cultural Adaptation (2005). Principles of Good Practice for the  
45  
46 Translation and Cultural Adaptation Process for Patient-Reported Outcomes (PRO) Measures:  
47  
48 report of the ISPOR Task Force for Translation and Cultural Adaptation. Value Health. 8: 94-  
49  
50 104.  
51

52  
53 33. Sullivan GM & Feinn R (2012). Using Effect Size-or Why the P Value Is Not Enough.  
54  
55 Journal of Graduate Medical Education, 4(3), 279-282.  
56

57  
58 34. Portney LG, Watkins MP. (2009). Foundations of clinical research: Applications to  
59  
60 practice. 3rd ed. Upper Saddle River, N.J.: Pearson/Prentice Hall.

- 1  
2  
3 35. Yates P, Garralda ME, Higginson I. (1999). Paddington Complexity Scale and Health of  
4 the Nation Outcome Scales for Children and Adolescents. *British Journal of Psychiatry*.  
5  
6 174:417–423  
7  
8  
9  
10 36. Bilenberg N. (2003). Health of the Nation Outcome Scales for Children and Adolescents  
11 (HoNOSCA): Results of a Danish field trial. *European Child and Adolescent Psychiatry*.  
12  
13 2003;12:298–302.  
14  
15  
16 37. Peterson RA. (2000). A meta-analysis of variance accounted for and factor loadings in  
17 exploratory factor analysis. *Marketing Letters*. 11:261-275  
18  
19  
20  
21 38. Schraeder K & Reid G. (2017). Who should transition? Defining a target population of  
22 youth with depression and anxiety that will require adult mental health care. *J Behav. Heal.*  
23  
24 *Serv. Res*, 44: 316-330.  
25  
26  
27  
28 39. Talbot RJ. (1991). Underprivileged areas and health care planning: implications of use of  
29 Jarman indicators of urban deprivation. *BMJ*. 302(6773):383-386.  
30  
31  
32  
33  
34  
35  
36  
37  
38  
39  
40  
41  
42  
43  
44  
45  
46  
47  
48  
49  
50  
51  
52  
53  
54  
55  
56  
57  
58  
59  
60

view only



1  
2  
3 Figure 1: Summary of the main stages, methods and analyses of the TRAM  
4

5 **INSERT FIGURE 1 HERE**  
6

7  
8 Abbreviations: AD (Adolescents), CL (Clinicians), PC (Parent/Carer)  
9  
10  
11  
12  
13  
14  
15  
16  
17  
18  
19  
20  
21  
22  
23  
24  
25  
26  
27  
28  
29  
30  
31  
32  
33  
34  
35  
36  
37  
38  
39  
40  
41  
42  
43  
44  
45  
46  
47  
48  
49  
50  
51  
52  
53  
54  
55  
56  
57  
58  
59  
60

For peer review only

Table 1. Test-retest Reliability of the TRAM (n=100)

## (A) Pearson's correlation coefficients

| <b>Sub-Scale</b>           | <b>Adolescent<br/>(AD: n=36)</b> | <b>Parent/Carer<br/>(PC: n=29)</b> | <b>Clinician<br/>(CL: n=35)</b> |
|----------------------------|----------------------------------|------------------------------------|---------------------------------|
| Symptoms                   | .928**                           | .936**                             | .773**                          |
| Overall Disruption         | .817**                           | .935**                             | .942**                          |
| Barriers to Functioning    | .813**                           | .908**                             | .824**                          |
| Risk Factors               | .897**                           | .864**                             | .914**                          |
| Factors Affecting Symptoms | .734**                           | .679**                             | .912**                          |

Key:  $p < 0.01^{**}$

## (B) Mean and Standard deviations

| <b>Sub-Scale</b>                  |                    | <b>Adolescent<br/>(AD: n=36)</b> |         | <b>Parent/Carer<br/>(PC: n=29)</b> |         | <b>Clinician<br/>(CL: n=35)</b> |         |
|-----------------------------------|--------------------|----------------------------------|---------|------------------------------------|---------|---------------------------------|---------|
|                                   |                    | Baseline                         | Re-test | Baseline                           | Re-test | Baseline                        | Re-test |
| <b>Symptoms</b>                   | Mean               | 16.667                           | 14.167  | 12.379                             | 10.466  | 11.629                          | 11.300  |
|                                   | Standard Deviation | 9.789                            | 9.667   | 8.548                              | 8.757   | 5.945                           | 6.253   |
| <b>Overall Disruption</b>         | Mean               | 9.944                            | 8.694   | 8.655                              | 8.379   | 11.086                          | 11.200  |
|                                   | Standard Deviation | 6.697                            | 5.956   | 8.784                              | 8.954   | 7.625                           | 8.554   |
| <b>Barriers to Functioning</b>    | Mean               | 7.472                            | 6.778   | 6.655                              | 6.034   | 7.086                           | 6.314   |
|                                   | Standard Deviation | 3.501                            | 3.743   | 4.685                              | 3.530   | 3.673                           | 3.636   |
| <b>Risk Factors</b>               | Mean               | 6.847                            | 6.167   | 4.621                              | 4.379   | 5.829                           | 6.014   |
|                                   | Standard Deviation | 4.657                            | 4.623   | 4.037                              | 4.212   | 4.711                           | 4.999   |
| <b>Factors Affecting Symptoms</b> | Mean               | 2.167                            | 1.889   | 1.759                              | 1.276   | 2.171                           | 2.029   |
|                                   | Standard Deviation | 1.464                            | 1.348   | 1.596                              | 1.251   | 1.445                           | 1.224   |

Table 2. Pearson's product moment correlation coefficients for the TRAM sub-scales with HoNOSCA and CGI scales.

| Scales            | TRAM Sub-Scales |                    |               |                            |                         |
|-------------------|-----------------|--------------------|---------------|----------------------------|-------------------------|
|                   | Symptom         | Overall Disruption | Risk Factors  | Factors affecting Symptoms | Barriers to functioning |
| <b>HoNOSCA AD</b> | .378**(n=914)   | .345**(n=914)      | .370**(n=914) | .306**(n=914)              | .249**(n=577)           |
| <b>HoNOSCA PC</b> | .369**(n=738)   | .329**(n=738)      | .374**(n=738) | .349**(n=738)              | .151**(n=477)           |
| <b>HoNOSCA CL</b> | .478**(n=845)   | .437** (n=845)     | .442**(n=845) | .357**(n=845)              | .340**(n=502)           |
| <b>CGI-S AD</b>   | .242**(n=832)   | .261**(n=832)      | .210**(n=832) | .294**(n=832)              | .149**(n=527)           |
| <b>CGI-S PC</b>   | .319**(n=684)   | .285**(n=684)      | .237**(n=684) | .338**(n=684)              | .187**(n=444)           |
| <b>CGI-S CL</b>   | .548**(n=836)   | .514**(n=836)      | .373**(n=836) | .352**(n=182)              | .307**(n=499)           |

Key:  $p < 0.01$ \*\*; Null hypothesis is that the Pearson's correlation coefficient equals zero.

Abbreviations: AD (Adolescents), CGI-S (Clinical Global Impression Severity); Clinicians (CL), HoNOSCA (Health of the Nation Outcome Scale for Children and Adolescents), PC (Parent/Carer).

Table 3. Summary of Pearson’s Correlation of the TRAM sub-scales with SLOF Subscales

| Sub-scale                  | Adolescent           |                      |                             |                      |                 |                 |
|----------------------------|----------------------|----------------------|-----------------------------|----------------------|-----------------|-----------------|
|                            | Physical Functioning | Personal Care Skills | Interpersonal Relationships | Social Acceptability | Activities      | Work Skills     |
| Symptoms                   | -0.068 (n=732)       | -.098** (n=732)      | -.159** (n=732)             | -.302** (n=732)      | -0.054 (n=732)  | -.085* (n=732)  |
| Overall disruption         | -.107** (n=732)      | -.157** (n=732)      | -.265** (n=732)             | -.286** (n=732)      | -.181** (n=732) | -.138** (n=732) |
| Risk Factors               | -0.026 (n=732)       | -0.022 (n=732)       | -.106** (n=732)             | -.299** (n=732)      | 0.006 (n=732)   | -0.004 (n=732)  |
| Factors Affecting Symptoms | -0.062 (n=732)       | -0.033 (n=732)       | -.087* (n=732)              | -.217** (n=732)      | -0.042 (n=732)  | -0.025 (n=732)  |
| Barriers to Functioning    | -0.070 (n=475)       | -.186** (n=475)      | -.216** (n=475)             | -.229** (n=475)      | -.199** (n=475) | -.239** (n=475) |

  

| Sub-scale                  | Parent/Carer         |                      |                             |                      |                 |                 |
|----------------------------|----------------------|----------------------|-----------------------------|----------------------|-----------------|-----------------|
|                            | Physical Functioning | Personal Care Skills | Interpersonal Relationships | Social Acceptability | Activities      | Work Skills     |
| Symptoms                   | -.180** (n=744)      | -.275** (n=744)      | -.411** (n=744)             | -.569** (n=744)      | -.306** (n=744) | -.223** (n=744) |
| Overall disruption         | -.234** (n=744)      | -.552** (n=744)      | -.571** (n=744)             | -.494** (n=744)      | -.575** (n=744) | -.436** (n=744) |
| Risk Factors               | -.170** (n=744)      | -.228** (n=744)      | -.300** (n=744)             | -.597** (n=744)      | -.223** (n=744) | -.125** (n=744) |
| Factors Affecting Symptoms | -0.067 (n=744)       | -.141** (n=744)      | -.201** (n=744)             | -.394** (n=744)      | -.126** (n=744) | -.091* (n=744)  |
| Barriers to Functioning    | -.198** (n=483)      | -.420** (n=483)      | -.461** (n=483)             | -.417** (n=483)      | -.528** (n=483) | -.472** (n=483) |

  

| Sub-scale                  | Clinician            |                      |                             |                      |                 |                 |
|----------------------------|----------------------|----------------------|-----------------------------|----------------------|-----------------|-----------------|
|                            | Physical Functioning | Personal Care Skills | Interpersonal Relationships | Social Acceptability | Activities      | Work Skills     |
| Symptoms                   | -.087* (n=678)       | -.155** (n=678)      | -.211** (n=678)             | -.242** (n=678)      | -.138** (n=678) | -.154** (n=678) |
| Overall disruption         | -.130** (n=678)      | -.332** (n=678)      | -.399** (n=678)             | -.279** (n=678)      | -.392** (n=678) | -.316** (n=678) |
| Risk Factors               | -0.071 (n=678)       | -.137** (n=678)      | -.194** (n=678)             | -.358** (n=678)      | -.076* (n=678)  | -.106** (n=678) |
| Factors Affecting Symptoms | 0.012 (n=132)        | -0.068 (n=132)       | -0.084 (n=132)              | -.253** (n=132)      | -0.046 (n=132)  | -0.100 (n=132)  |
| Barriers to Functioning    | -0.048 (n=414)       | -.240** (n=414)      | -.189** (n=414)             | -.275** (n=414)      | -.256** (n=414) | -.322** (n=414) |

Key:  $p < 0.01^{**}$ ,  $p < 0.05^{*}$ ; Null hypothesis is that the Pearson’s correlation coefficient equals zero.

Table 4. Summary of EFA for the Adolescent version of the TRAM's sub-scales

| <b>Symptoms Sub-Scale</b>                  |                        |                            |
|--------------------------------------------|------------------------|----------------------------|
|                                            | Factors                |                            |
|                                            | Internalising Symptoms | Externalizing Symptoms     |
| <b>Anxiety</b>                             | <b>0.896</b>           | -0.222                     |
| <b>Depression</b>                          | <b>0.794</b>           | 0.020                      |
| <b>Borderline personality</b>              | <b>0.482</b>           | 0.334                      |
| <b>Post-traumatic stress</b>               | <b>0.358</b>           | 0.197                      |
| <b>Social communication difficulties</b>   | <b>0.356</b>           | 0.196                      |
| <b>Eating difficulties</b>                 | <b>0.313</b>           | 0.086                      |
| <b>Other mental health</b>                 | <b>0.186</b>           | 0.107                      |
| <b>Antisocial behaviour</b>                | -0.083                 | <b>0.585</b>               |
| <b>Mania</b>                               | -0.019                 | <b>0.570</b>               |
| <b>Attention deficit</b>                   | 0.139                  | <b>0.380</b>               |
| <b>Psychosis</b>                           | 0.282                  | <b>0.366</b>               |
| <b>Overall disruption Sub-Scale</b>        |                        |                            |
|                                            | Factors                |                            |
|                                            | Relationships          | Activities of Daily Living |
| <b>Relationships with friends</b>          | <b>0.903</b>           | -0.088                     |
| <b>Relationships with peers/colleagues</b> | <b>0.845</b>           | -0.082                     |
| <b>Social</b>                              | <b>0.550</b>           | 0.199                      |
| <b>Relationships with family</b>           | <b>0.455</b>           | 0.124                      |
| <b>Education work performance</b>          | <b>0.406</b>           | 0.256                      |
| <b>Sleep</b>                               | <b>0.360</b>           | 0.244                      |
| <b>Household chores</b>                    | 0.017                  | <b>0.721</b>               |
| <b>Self-care</b>                           | -0.059                 | <b>0.708</b>               |
| <b>Responsibility</b>                      | 0.048                  | <b>0.678</b>               |
| <b>Community</b>                           | 0.252                  | <b>0.432</b>               |

| <b>Barriers to Functioning Sub-Scale</b>      |                 |                |              |
|-----------------------------------------------|-----------------|----------------|--------------|
|                                               | Factors         |                |              |
|                                               | Patient Factors | Family Support | Treatment    |
| <b>Knowledge of accessing service</b>         | <b>0.636</b>    | -0.103         | -0.053       |
| <b>Ability to act as independent</b>          | <b>0.591</b>    | -0.232         | 0.031        |
| <b>Understanding of mental health</b>         | <b>0.496</b>    | 0.055          | -0.061       |
| <b>Adolescent built trusting relationship</b> | <b>0.420</b>    | 0.225          | 0.011        |
| <b>Ability to repeat history</b>              | <b>0.413</b>    | 0.230          | -0.087       |
| <b>Adolescent wants parent carer</b>          | -0.078          | <b>0.691</b>   | -0.100       |
| <b>Presence of support</b>                    | 0.031           | <b>0.527</b>   | 0.141        |
| <b>Taking medication as prescribed</b>        | -0.149          | -0.052         | <b>0.529</b> |
| <b>Motivation to manage condition</b>         | 0.172           | 0.081          | <b>0.496</b> |

| <b>Risk Factors Sub Scale</b>       |               |               |
|-------------------------------------|---------------|---------------|
|                                     | Factors       |               |
|                                     | Internal Risk | External Risk |
| <b>Suicidal thoughts behaviours</b> | <b>0.848</b>  | 0.001         |
| <b>Self-harming behaviours</b>      | <b>0.788</b>  | -0.056        |
| <b>Stress</b>                       | <b>0.397</b>  | 0.130         |
| <b>Risk to others</b>               | -0.073        | <b>0.649</b>  |
| <b>Risk to self</b>                 | 0.145         | <b>0.529</b>  |
| <b>Risk from others</b>             | 0.234         | <b>0.269</b>  |

| <b>Factors Affecting Symptoms Sub-Scale</b> |                           |                        |
|---------------------------------------------|---------------------------|------------------------|
|                                             | Factors                   |                        |
|                                             | Relapse of Illness Factor | Somatic Illness Factor |
| <b>Inpatient hospital stays</b>             | <b>0.594</b>              | -0.088                 |
| <b>Service use in times of crisis</b>       | <b>0.569</b>              | -0.037                 |
| <b>Relapse likelihood</b>                   | <b>0.477</b>              | 0.145                  |
| <b>Ongoing treatment need</b>               | <b>0.365</b>              | 0.146                  |
| <b>Drug alcohol misuse</b>                  | <b>0.363</b>              | -0.110                 |
| <b>Presence of side effects</b>             | -0.041                    | <b>0.461</b>           |
| <b>Medical comorbidity</b>                  | -0.039                    | <b>0.335</b>           |

Or peer review only

Table 5. Summary of Deprivation Index Correlations with TRAM Sub-Scales

|                                             |                     | <b>Deprivation Index Correlations</b> |           |           |
|---------------------------------------------|---------------------|---------------------------------------|-----------|-----------|
|                                             |                     | <b>AD</b>                             | <b>PC</b> | <b>CL</b> |
| <b>Symptoms Sub-Scale</b>                   | Pearson Correlation | 0.027                                 | .116**    | .089*     |
|                                             | Sig. (2-tailed)     | 0.454                                 | 0.002     | 0.017     |
|                                             | N                   | 768                                   | 732       | 719       |
| <b>Risk Factors Sub Scale</b>               | Pearson Correlation | 0.052                                 | .175**    | .118**    |
|                                             | Sig. (2-tailed)     | 0.148                                 | 0.000     | 0.001     |
|                                             | N                   | 768                                   | 732       | 719       |
| <b>Overall disruption Sub-Scale</b>         | Pearson Correlation | .083*                                 | .162**    | .127**    |
|                                             | Sig. (2-tailed)     | 0.021                                 | 0.000     | 0.001     |
|                                             | N                   | 768                                   | 732       | 719       |
| <b>Factors Affecting Symptoms Sub-Scale</b> | Pearson Correlation | 0.031                                 | .111**    | 0.085     |
|                                             | Sig. (2-tailed)     | 0.396                                 | 0.003     | 0.298     |
|                                             | N                   | 768                                   | 732       | 151       |
| <b>Barriers to Functioning Sub-Scale</b>    | Pearson Correlation | -0.046                                | 0.061     | -0.019    |
|                                             | Sig. (2-tailed)     | 0.301                                 | 0.181     | 0.699     |
|                                             | N                   | 500                                   | 477       | 435       |

Abbreviations: AD (Adolescent); PC (Parent/Carer), CL (Clinician)

Key:  $p < 0.01$  \*\*; Null hypothesis is that the Pearson's correlation coefficient equals zero.



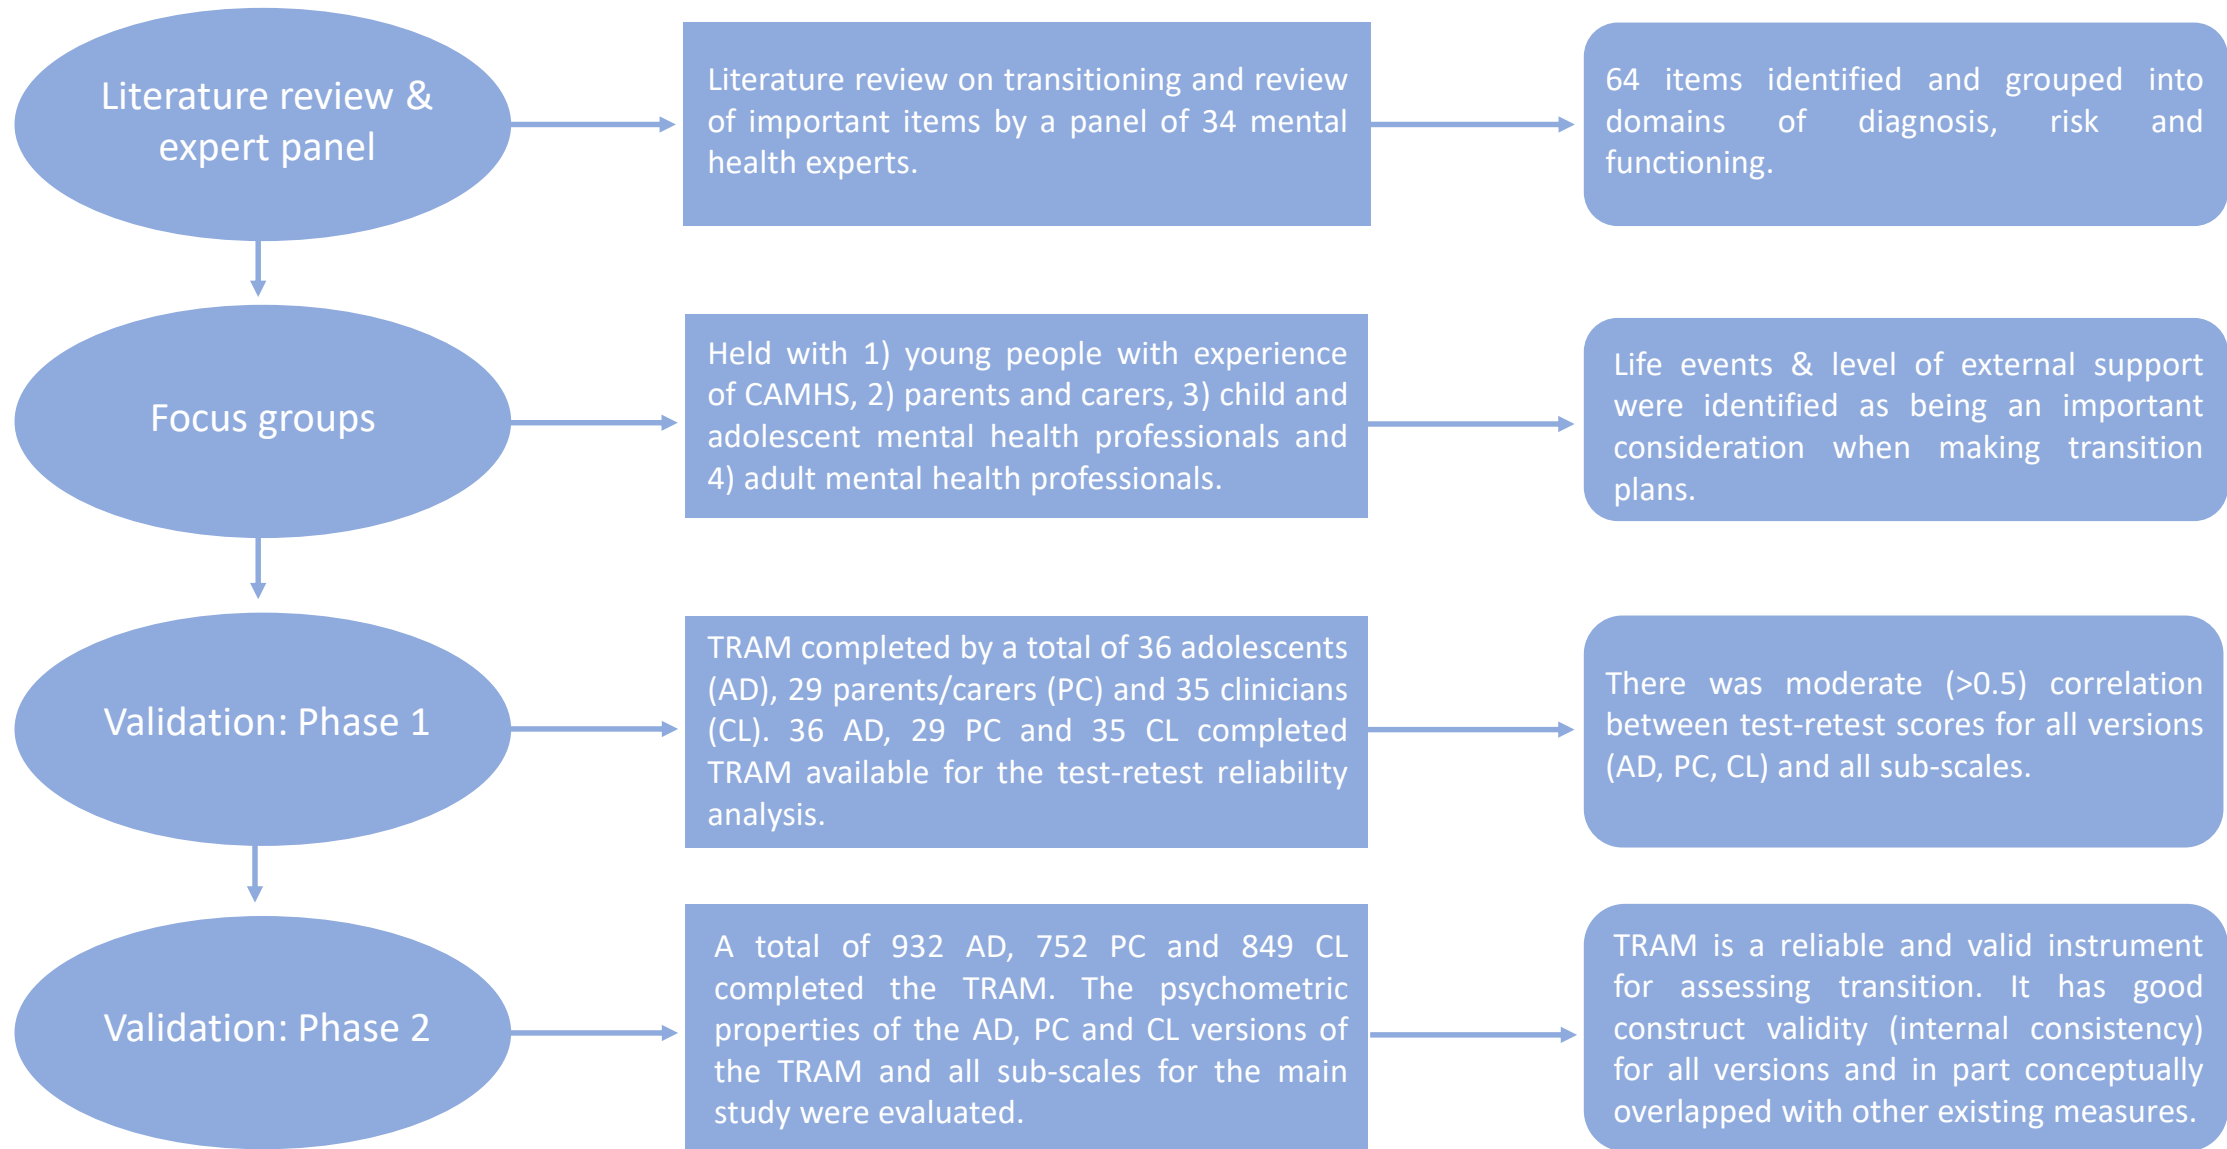

1  
2  
3  
4  
5  
6  
7  
8  
9  
10  
11  
12  
13  
14  
15  
16  
17  
18  
19  
20  
21  
22  
23  
24  
25  
26  
27  
28  
29  
30  
31  
32  
33  
34  
35  
36  
37  
38  
39  
40  
41

## Supplementary Information

## Supplementary Table 1

|                                              | <b>Diagnoses of Patients who completed TRAM</b> | <b>Diagnoses of Patients with Parent-completed TRAM</b> | <b>Diagnoses of Patients with Clinician-completed TRAM</b> |
|----------------------------------------------|-------------------------------------------------|---------------------------------------------------------|------------------------------------------------------------|
| Neurodevelopmental                           | 308                                             | 271                                                     | 290                                                        |
| Neurodevelopmental Other                     | 1                                               | 1                                                       | 1                                                          |
| Personality                                  | 35                                              | 27                                                      | 33                                                         |
| Personality Neurodevelopmental               | 1                                               | -                                                       | 1                                                          |
| Eating                                       | 63                                              | 55                                                      | 60                                                         |
| Eating Neurodevelopmental                    | 2                                               | 1                                                       | 2                                                          |
| Eating Personality                           | 1                                               | -                                                       | 1                                                          |
| Somatic                                      | 12                                              | 8                                                       | 11                                                         |
| Somatic Personality                          | 1                                               | -                                                       | 1                                                          |
| Dissociative                                 | -                                               | 1                                                       | 1                                                          |
| Trauma Stress                                | 46                                              | 29                                                      | 42                                                         |
| Trauma Stress Neurodevelopmental             | 2                                               | 2                                                       | 2                                                          |
| Trauma Stress Personality                    | 4                                               | 3                                                       | 4                                                          |
| Trauma Stress Personality Neurodevelopmental | 1                                               | 1                                                       | 1                                                          |
| Trauma Stress Eating                         | 1                                               | 1                                                       | 1                                                          |
| Trauma Stress Somatic Other                  | 1                                               | -                                                       | 1                                                          |
| OCD                                          | 24                                              | 21                                                      | 23                                                         |
| OCD Neurodevelopmental                       | 1                                               | 1                                                       | 1                                                          |
| OCD Personality                              | 1                                               | -                                                       | 1                                                          |
| Anxiety                                      | 114                                             | 100                                                     | 105                                                        |
| Anxiety Neurodevelopmental                   | 4                                               | 3                                                       | 4                                                          |
| Anxiety Personality                          | 1                                               | 1                                                       | 1                                                          |
| Anxiety Eating Personality                   | 1                                               | 1                                                       | 1                                                          |
| Anxiety Trauma Stress                        | 1                                               | 1                                                       | 1                                                          |
| Anxiety Trauma Stress Neurodevelopmental     | 1                                               |                                                         | 1                                                          |
| Anxiety OCD                                  | 2                                               | 2                                                       | 2                                                          |
| Anxiety OCD Personality                      | 1                                               | -                                                       | 1                                                          |
| Depressive                                   | 162                                             | 117                                                     | 140                                                        |
| Depressive other                             | 1                                               | 1                                                       | 1                                                          |
| Depressive Neurodevelopmental                | 14                                              | 12                                                      | 13                                                         |
| Depressive Gender Dysphoria                  | 1                                               | 1                                                       | 1                                                          |
| Depressive Personality                       | 5                                               | 2                                                       | 6                                                          |
| Depressive Personality Gender Dysphoria      | 1                                               | 1                                                       | 1                                                          |
| Depressive Eating                            | 1                                               | 1                                                       | 1                                                          |
| Depressive Trauma Stress                     | 9                                               | 7                                                       | 7                                                          |

|                                        |    |    |    |
|----------------------------------------|----|----|----|
| Depressive Trauma Stress Personality   | 1  | -  | 1  |
| Depressive Trauma Stress Somatic       | 1  | 1  | 1  |
| Depressive OCD                         | 1  | 1  | 1  |
| Depressive OCD Trauma Stress           | 1  | 1  | 1  |
| Depressive Anxiety                     | 22 | 15 | 15 |
| Depressive Anxiety Neurodevelopmental  | 2  | 2  | 2  |
| Depressive Anxiety OCD                 | 1  | 1  | 1  |
| Schizophrenia                          | 23 | 19 | 21 |
| Schizophrenia Neurodevelopmental       | 3  | 3  | 2  |
| Schizophrenia Depressive               | 1  | 1  | 1  |
| Schizophrenia Depressive Trauma Stress | 1  | 1  | 1  |
| Substance                              | 8  | 4  | 10 |
| Substance Trauma Stress                | 1  | 1  | 1  |
| Substance Depressive                   | -  | -  | 1  |
| Other Adult                            | 1  | 1  | 1  |
| Gender Dysphoria                       | 8  | 6  | 6  |
| Unspecified                            | 33 | 23 | 20 |

Notes: The diagnoses were grouped according to the diagnostic categories which were sensitive and relevant in transition making as part of the MILESTONE project. For this reason, the diagnostic categories did not follow the DSM-V or ICD-11 nomenclature and instead patients were grouped according to psychiatric diagnosis that also considered other factors relevant to patient well-being.

Supplementary Table 2

|                  | <b>Country of Recruitment of Patients who completed TRAM</b> | <b>Country of Recruitment of Patients with Parent-completed TRAM</b> | <b>Country of Recruitment of Patients with Clinician-completed TRAM</b> |
|------------------|--------------------------------------------------------------|----------------------------------------------------------------------|-------------------------------------------------------------------------|
| Italy            | 217                                                          | 207                                                                  | 212                                                                     |
| Netherlands      | 152                                                          | 108                                                                  | 139                                                                     |
| UK West Midlands | 122                                                          | 98                                                                   | 99                                                                      |
| Belgium          | 95                                                           | 69                                                                   | 81                                                                      |
| Germany          | 91                                                           | 68                                                                   | 97                                                                      |
| France           | 85                                                           | 85                                                                   | 87                                                                      |
| UK London        | 74                                                           | 21                                                                   | 41                                                                      |
| Croatia          | 52                                                           | 52                                                                   | 52                                                                      |
| Ireland          | 44                                                           | 44                                                                   | 41                                                                      |
| Total            | 932                                                          | 752                                                                  | 849                                                                     |

|         | <b>Gender of Patients who completed TRAM</b> | <b>Gender of Patients with Parent-completed TRAM</b> | <b>Gender of Patients with Clinician-completed TRAM</b> |
|---------|----------------------------------------------|------------------------------------------------------|---------------------------------------------------------|
| Female  | 572                                          | 443                                                  | 511                                                     |
| Male    | 357                                          | 309                                                  | 337                                                     |
| Not Set | 3                                            | -                                                    | 1                                                       |
| Total   | 932                                          | 752                                                  | 849                                                     |

|                                 | <b>Ethnicity of Patients who completed TRAM</b> | <b>Ethnicity of Patients with Parent-completed TRAM</b> | <b>Ethnicity of Patients with Clinician-completed TRAM</b> |
|---------------------------------|-------------------------------------------------|---------------------------------------------------------|------------------------------------------------------------|
| Caucasian                       | 741                                             | 610                                                     | 681                                                        |
| Not Set/Declared                | 101                                             | 95                                                      | 99                                                         |
| European                        | 18                                              | 12                                                      | 15                                                         |
| Hispanic                        | 11                                              | 7                                                       | 8                                                          |
| Other Mixed background          | 10                                              | 6                                                       | 8                                                          |
| Any other Asian background      | 8                                               | 6                                                       | 8                                                          |
| Asian Indian                    | 6                                               | 3                                                       | 5                                                          |
| Black African                   | 6                                               | 1                                                       | 5                                                          |
| Black Caribbean                 | 5                                               | 1                                                       | 1                                                          |
| Mixed White and Asian           | 5                                               | 3                                                       | 4                                                          |
| Mixed White and Black Caribbean | 5                                               | 3                                                       | 5                                                          |

|                               |     |     |     |
|-------------------------------|-----|-----|-----|
| Mixed White and Black African | 3   | 2   | 1   |
| Other Black background        | 3   | 1   | 2   |
| Asian Pakistani               | 2   | -   | 2   |
| Asian Bangladeshi             | 1   | -   | -   |
| Dutch with Lebanese Parents   | 1   | -   | 1   |
| Gypsy/Traveller               | 1   | 1   | 1   |
| Kurdish                       | 1   | -   | -   |
| Latin American                | 1   | -   | 1   |
| Moroccan                      | 1   | -   | 1   |
| Polish descent                | 1   | -   | 1   |
| Surinamese                    | 1   | 1   | -   |
| Total                         | 932 | 752 | 849 |

# BMJ Open

## Validation of the Transition Readiness and Appropriateness Measure (TRAM) for the Managing the Link and Strengthening Transition from Child to Adult Mental Health Care in Europe (MILESTONE) study

|                               |                                                                                                                                                                                                                                                                                                                                                                                                                                                                                                                                                                                                                                                                                                                                                                                                                                                                                                                                                                                                                                                                                                                                                                                                                                                                                                                                                                                                                                                                                                                                                                                                                                                                                                                                                                                                                                                                                                                                                                                                                                                                                                                                                                                               |
|-------------------------------|-----------------------------------------------------------------------------------------------------------------------------------------------------------------------------------------------------------------------------------------------------------------------------------------------------------------------------------------------------------------------------------------------------------------------------------------------------------------------------------------------------------------------------------------------------------------------------------------------------------------------------------------------------------------------------------------------------------------------------------------------------------------------------------------------------------------------------------------------------------------------------------------------------------------------------------------------------------------------------------------------------------------------------------------------------------------------------------------------------------------------------------------------------------------------------------------------------------------------------------------------------------------------------------------------------------------------------------------------------------------------------------------------------------------------------------------------------------------------------------------------------------------------------------------------------------------------------------------------------------------------------------------------------------------------------------------------------------------------------------------------------------------------------------------------------------------------------------------------------------------------------------------------------------------------------------------------------------------------------------------------------------------------------------------------------------------------------------------------------------------------------------------------------------------------------------------------|
| Journal:                      | <i>BMJ Open</i>                                                                                                                                                                                                                                                                                                                                                                                                                                                                                                                                                                                                                                                                                                                                                                                                                                                                                                                                                                                                                                                                                                                                                                                                                                                                                                                                                                                                                                                                                                                                                                                                                                                                                                                                                                                                                                                                                                                                                                                                                                                                                                                                                                               |
| Manuscript ID                 | bmjopen-2019-033324.R2                                                                                                                                                                                                                                                                                                                                                                                                                                                                                                                                                                                                                                                                                                                                                                                                                                                                                                                                                                                                                                                                                                                                                                                                                                                                                                                                                                                                                                                                                                                                                                                                                                                                                                                                                                                                                                                                                                                                                                                                                                                                                                                                                                        |
| Article Type:                 | Original research                                                                                                                                                                                                                                                                                                                                                                                                                                                                                                                                                                                                                                                                                                                                                                                                                                                                                                                                                                                                                                                                                                                                                                                                                                                                                                                                                                                                                                                                                                                                                                                                                                                                                                                                                                                                                                                                                                                                                                                                                                                                                                                                                                             |
| Date Submitted by the Author: | 04-May-2020                                                                                                                                                                                                                                                                                                                                                                                                                                                                                                                                                                                                                                                                                                                                                                                                                                                                                                                                                                                                                                                                                                                                                                                                                                                                                                                                                                                                                                                                                                                                                                                                                                                                                                                                                                                                                                                                                                                                                                                                                                                                                                                                                                                   |
| Complete List of Authors:     | <p>Santosh, Paramala; King's College London , Child and Adolescent Psychiatry</p> <p>Singh, Jatinder; Institute of Psychiatry, Psychology &amp; Neuroscience, Department of Child and Adolescent Psychiatry</p> <p>Adams, Laura; University of Plymouth, School of Psychology</p> <p>Mastroianni, Mathilde; King's College London , Child and Adolescent Psychiatry</p> <p>Heaney, Natalie; King's College London , Child and Adolescent Psychiatry</p> <p>Lievesley, Kate; HealthTracker</p> <p>Sagar-Ouriaghli, Ilyas; King's College London , Child and Adolescent Psychiatry</p> <p>Allibrio, Giovanni; ASST Spedali Civili di Brescia Dipartimento di Salute Mentale, Unit of Neuropsychiatry</p> <p>Appleton, Rebecca; University of Warwick, Warwick Medical School</p> <p>Davidović, Nikolina; Department of Psychiatry, Clinical Hospital Center Split,</p> <p>De Girolamo, Giovanni; Saint John of God Clinical Research Center, Brescia, Italy, Psychiatric Epidemiology and Evaluation Unit</p> <p>Dieleman, Gwen; Erasmus MC, Department of Child and Adolescent Psychiatry and Psychology</p> <p>Dodig-Ćurković, Katarina; KBC Osijek, Department of Pediatric and Adolescent Psychiatry</p> <p>Franić, Tomislav; Department of Psychiatry, Clinical Hospital Center Split</p> <p>Gatherer, Charlotte; University of Warwick, Warwick Medical School</p> <p>Gerritsen, Suzanne; Erasmus MC, Department of Child and Adolescent Psychiatry and Psychology</p> <p>Gheza, Elisa; ASST della Valcamonica, Mental Health Department</p> <p>Madan, Jason; University of Warwick, Warwick Medical School</p> <p>Manenti, Lidia; ASST Spedali Civili di Brescia Dipartimento di Salute Mentale, Unit of Neuropsychiatry</p> <p>Maras, Athanasios; Yulius Academy, Rotterdam, Netherlands; Department of Child and Adolescent Psychiatry and Psychology, Erasmus Medical Center, Rotterdam, Netherlands</p> <p>Margari, Francesco; University of Bari, Department of Basic Medical Sciences, Neuroscience and Sense Organs</p> <p>McNicholas, Fiona; University College Dublin School of Medicine and Medical Science, SMMS; Our Lady's Hospital For Sick Children, Child Psychiatry</p> |

|                                 |                                                                                                                                                                                                                                                                                                                                                                                                                                                                                                                                                                                                                                                                                                                                                                                                                                                                                                                                                                                                                                                                                                                                                                                                                                                                                                                                                                                                                                                                                                                                                                                                                                                                                            |
|---------------------------------|--------------------------------------------------------------------------------------------------------------------------------------------------------------------------------------------------------------------------------------------------------------------------------------------------------------------------------------------------------------------------------------------------------------------------------------------------------------------------------------------------------------------------------------------------------------------------------------------------------------------------------------------------------------------------------------------------------------------------------------------------------------------------------------------------------------------------------------------------------------------------------------------------------------------------------------------------------------------------------------------------------------------------------------------------------------------------------------------------------------------------------------------------------------------------------------------------------------------------------------------------------------------------------------------------------------------------------------------------------------------------------------------------------------------------------------------------------------------------------------------------------------------------------------------------------------------------------------------------------------------------------------------------------------------------------------------|
|                                 | <p>Pastore, Adriana; University of Bari, Department of Basic Medical Sciences, Neuroscience and Sense Organs</p> <p>Paul, Moli; Coventry and Warwickshire Partnership NHS Trust; University of Warwick Warwick Medical School</p> <p>Purper-Ouakil, Diane; Centre Hospitalier Regional Universitaire de Montpellier</p> <p>Rinaldi, Francesco; ASST della Valcamonica, Mental Health Department</p> <p>Sakar, Vehbi; Universitätsklinikum Ulm</p> <p>Schulze, Ulrike; Universitätsklinikum Ulm</p> <p>Signorini, Giulia; Psychiatric Epidemiology and Evaluation Unit, Saint John of God Clinical Research Center, Brescia, Italy</p> <p>Street, Cathy; University of Warwick, Warwick Medical School</p> <p>Tah, Priya; University of Warwick, Warwick Medical School</p> <p>Tremmery, Sabine; Katholieke Universiteit Leuven, Department of Neurosciences, Child &amp; Adolescent Psychiatry</p> <p>Tuffrey, Amanda; University of Warwick, Warwick Medical School</p> <p>Tuomainen, Helena; University of Warwick, Warwick Medical School</p> <p>Verhulst, Frank; Department of Child and Adolescent Psychiatry and Psychology, Erasmus Medical Center, Rotterdam, Netherlands</p> <p>Warwick, Jane; University of Warwick Warwick Medical School, Warwick Clinical Trials Unit</p> <p>Wilson, Anna; University of Warwick, Warwick Medical School</p> <p>Wolke, Dieter; University of Warwick, Department of Psychology and Division of Mental Health and Wellbeing</p> <p>Fiori, Federico; Institute of Psychiatry, Psychology &amp; Neuroscience, Department of Child and Adolescent Psychiatry</p> <p>Singh, Swaran; Warwick Medical School, Health Sciences Research Institute</p> |
| <b>Primary Subject Heading</b>: | Mental health                                                                                                                                                                                                                                                                                                                                                                                                                                                                                                                                                                                                                                                                                                                                                                                                                                                                                                                                                                                                                                                                                                                                                                                                                                                                                                                                                                                                                                                                                                                                                                                                                                                                              |
| Secondary Subject Heading:      | Health informatics, Health services research, Paediatrics                                                                                                                                                                                                                                                                                                                                                                                                                                                                                                                                                                                                                                                                                                                                                                                                                                                                                                                                                                                                                                                                                                                                                                                                                                                                                                                                                                                                                                                                                                                                                                                                                                  |
| Keywords:                       | Transition Readiness and Appropriateness Measure (TRAM), Validation, Child and Adolescent Mental Health Services, Adult Mental Health Services, Young Persons                                                                                                                                                                                                                                                                                                                                                                                                                                                                                                                                                                                                                                                                                                                                                                                                                                                                                                                                                                                                                                                                                                                                                                                                                                                                                                                                                                                                                                                                                                                              |
|                                 |                                                                                                                                                                                                                                                                                                                                                                                                                                                                                                                                                                                                                                                                                                                                                                                                                                                                                                                                                                                                                                                                                                                                                                                                                                                                                                                                                                                                                                                                                                                                                                                                                                                                                            |

SCHOLARONE™  
Manuscripts



I, the Submitting Author has the right to grant and does grant on behalf of all authors of the Work (as defined in the below author licence), an exclusive licence and/or a non-exclusive licence for contributions from authors who are: i) UK Crown employees; ii) where BMJ has agreed a CC-BY licence shall apply, and/or iii) in accordance with the terms applicable for US Federal Government officers or employees acting as part of their official duties; on a worldwide, perpetual, irrevocable, royalty-free basis to BMJ Publishing Group Ltd ("BMJ") its licensees and where the relevant Journal is co-owned by BMJ to the co-owners of the Journal, to publish the Work in this journal and any other BMJ products and to exploit all rights, as set out in our [licence](#).

The Submitting Author accepts and understands that any supply made under these terms is made by BMJ to the Submitting Author unless you are acting as an employee on behalf of your employer or a postgraduate student of an affiliated institution which is paying any applicable article publishing charge ("APC") for Open Access articles. Where the Submitting Author wishes to make the Work available on an Open Access basis (and intends to pay the relevant APC), the terms of reuse of such Open Access shall be governed by a Creative Commons licence – details of these licences and which [Creative Commons](#) licence will apply to this Work are set out in our licence referred to above.

Other than as permitted in any relevant BMJ Author's Self Archiving Policies, I confirm this Work has not been accepted for publication elsewhere, is not being considered for publication elsewhere and does not duplicate material already published. I confirm all authors consent to publication of this Work and authorise the granting of this licence.



1  
2  
3  
4  
5  
6  
7  
8  
9  
10  
11  
12  
13  
14  
15  
16  
17  
18  
19  
20  
21  
22  
23  
24  
25  
26  
27  
28  
29  
30  
31  
32  
33  
34  
35

# Validation of the Transition Readiness and Appropriateness Measure (TRAM) for the Managing the Link and Strengthening Transition from Child to Adult Mental Health Care in Europe (MILESTONE) study

36  
37  
38  
39  
40  
41  
42  
43  
44  
45  
46  
47  
48  
49  
50  
51  
52  
53  
54  
55  
56  
57  
58  
59  
60

Santosh P<sup>1,2,3</sup>, Singh J<sup>1,2</sup>, Adams L<sup>4</sup>, Mastroianni M<sup>1</sup>, Heaney N<sup>1</sup>, Lievesley K<sup>3</sup>, Sagar-Ouriaghli I<sup>1</sup>, Allibrio G<sup>5</sup>, Appleton R<sup>6</sup>, Davidovic N<sup>7</sup>, de Girolamo G<sup>8</sup>, Dieleman G<sup>9</sup>, Dodig-Curkovic K<sup>10</sup>, Franić T<sup>7</sup>, Gatherer C<sup>6</sup>, Gerritsen S<sup>9</sup>, Gheza E<sup>11</sup>, Madan J<sup>12</sup>, Manenti L<sup>5</sup>, Maras A<sup>9,13</sup>, Margari F<sup>14</sup>, McNicholas F<sup>15,16,17,18</sup>, Pastore A<sup>14</sup>, Paul M<sup>6,19</sup>, Purper-Ouakil D<sup>20</sup>, Rinaldi F<sup>11</sup>, Sakar V<sup>21</sup>, Schulze U<sup>21</sup>, Signorini G<sup>8</sup>, Street C<sup>6</sup>, Tah P<sup>6</sup>, Tremmery S<sup>22,23</sup>, Tuffrey A<sup>6</sup>, Tuomainen H<sup>6</sup>, Verhulst F<sup>9</sup>, Warwick J<sup>12</sup>, Wilson A<sup>6</sup>, Wolke D<sup>6,24</sup>, Fiori F<sup>1,2,3</sup>, Singh SP<sup>6,19</sup> for the MILESTONE Consortium

## Affiliations:

<sup>1</sup>Department of Child and Adolescent Psychiatry, King's College London, London, UK.

<sup>2</sup>Centre for Interventional Paediatric Psychopharmacology and Rare Diseases, South London and Maudsley NHS Foundation Trust, London, UK.

<sup>3</sup>HealthTracker Ltd, Gillingham, Kent, United Kingdom.

<sup>4</sup>School of Psychology, Plymouth University, UK.

<sup>5</sup>Unit of Neuropsychiatry, ASST Spedali Civili, Brescia, Italy

<sup>6</sup>Mental Health and Wellbeing, Warwick Medical School, University of Warwick, Coventry, UK.

<sup>7</sup>Department of Psychiatry, Clinical Hospital Center Split, Split, Croatia.

<sup>8</sup>IRCCS Istituto Centro San Giovanni di Dio Fatebenefratelli, Brescia, Italy.

<sup>9</sup>Department of Child and Adolescent Psychiatry and Psychology, Erasmus Medical Center, Rotterdam, The Netherlands.

<sup>10</sup>Institute for Child and Adolescent Psychiatry, University Health Center Osijek, Croatia

<sup>11</sup>Neuropsychiatry Service of Childhood and Adolescence, Mental Health Department, ASST Valcamonica Esine, Brescia, Italy

<sup>12</sup>Warwick Clinical Trials Unit, Warwick Medical School, Warwick Medical School, Coventry, UK.

<sup>13</sup>Yulius Academy, Rotterdam, The Netherlands.

<sup>14</sup>Department of Basic Medical Sciences, Neuroscience and Sense Organs, University of Bari, Italy

1  
2  
3 <sup>15</sup>Department of Child and Adolescent Psychiatry, University College Dublin School of Medicine and Medical  
4 Science, Dublin, Republic of Ireland.

5  
6 <sup>16</sup>Geary Institute, University College Dublin, Dublin, Republic of Ireland.

7  
8 <sup>17</sup>Department of Child Psychiatry, Our Lady's Hospital for Sick Children, Dublin, Republic of Ireland.

9  
10 <sup>18</sup>Lucena Clinic, SJOG, Dublin, Republic of Ireland.

11  
12 <sup>19</sup>Coventry and Warwickshire Partnership NHS Trust, UK.

13  
14 <sup>20</sup>CHU Montpellier / University of Montpellier; Saint Eloi Hospital; Médecine Psychologique de l'enfant et de  
15 adolescent (MPEA1); Montpellier, France.

16  
17 <sup>21</sup>Department of Child and Adolescent Psychiatry/Psychotherapy, University of Ulm, Ulm, Germany.

18  
19 <sup>22</sup>Department of Neurosciences, Child & Adolescent Psychiatry, University of Leuven, Leuven, Belgium.

20  
21 <sup>23</sup>Department of Child & Adolescent Psychiatry, University Hospitals Leuven, Leuven, Belgium.

22  
23 <sup>24</sup>Department of Psychology, University of Warwick, Coventry, UK.

### 24 25 **Corresponding author:**

26  
27 Professor Paramala Santosh,

28  
29 Centre for Interventional Paediatric Psychopharmacology and Rare Diseases (CIPPRD)

30  
31 Research Team,

32  
33 4 Windsor Walk, Denmark Hill,

34  
35 London SE5 8BB,

36  
37 United Kingdom

38  
39 E-mail: [paramala.1.santosh@kcl.ac.uk](mailto:paramala.1.santosh@kcl.ac.uk)

### 40 41 **Key Words**

42  
43 Transition Readiness and Appropriateness Measure (TRAM); Validation; Child and  
44  
45 Adolescent Mental Health Services; Adult Mental Health Services; Young Persons  
46  
47  
48  
49  
50  
51  
52  
53  
54  
55  
56  
57  
58  
59  
60

## Abstract

**Objective:** Young people moving from child and adolescent mental health services (CAMHS) to adult mental health services (AMHS) are faced with significant challenges. To improve this state of affairs not only does there need to be a recognition of the problem and initiatives but an urgent requirement for appropriate tools for measuring readiness and outcomes at the transfer boundary (16-18 years old in Europe). The objective of this study was to develop and validate the Transition Readiness and Appropriateness Measure (TRAM) for assessing a young person's readiness for transition, and their outcomes at the transfer boundary.

**Design:** MILESTONE prospective study.

**Setting:** Eight European Union (EU) countries participating in the EU funded MILESTONE study.

**Participants:** The first phase (MILESTONE validation study) involved 100 adolescents (pre-transition), young adults (post-transition), parents/carers and both CAMHS and AMHS clinicians. The second phase (MILESTONE cohort study and nested cluster randomised trial) involved over 1000 young people.

**Results:** The development of the TRAM began with a literature review on transitioning and a review of important items regarding transition by a panel of 34 mental health experts. A list of 64 items of potential importance were identified, which together comprised the TRAM. The psychometric properties of the different versions of the TRAM were evaluated and showed that the TRAM had good reliability for all versions and low to moderate correlations when compared with other established instruments and a well-defined factor structure. The main results of the cohort study with the nested cluster randomised trial are not reported.

**Conclusion:** The TRAM is a reliable instrument for assessing transition readiness and appropriateness. It highlighted the barriers to a successful transition and informed clinicians,

1  
2  
3 identifying areas which clinicians on both sides of the transfer boundary can work on to ease  
4  
5 the transition for the young person.  
6  
7  
8  
9  
10  
11  
12  
13  
14  
15  
16  
17  
18  
19  
20  
21  
22  
23  
24  
25  
26  
27  
28  
29  
30  
31  
32  
33  
34  
35  
36  
37  
38  
39  
40  
41  
42  
43  
44  
45  
46  
47  
48  
49  
50  
51  
52  
53  
54  
55  
56  
57  
58  
59  
60

For peer review only

### Strengths and limitations of this study

- The European Union (EU) funded Managing the Link and Strengthening Transition from Child to Adult Mental Health Care in Europe (MILESTONE) study provides a useful model to evaluate the readiness of transition for young people.
- The MILESTONE study allowed the TRAM to be holistic in its scope because it ensured that all the essential information to assist with transition from CAMHS to AMHS was captured in its entirety especially given the fact that the transition journey for young people is very difficult and often poorly managed.
- The focus groups gathered extensive input from young people, their family members and mental health professionals with experience in transition within mental health.
- The web-based aspect of the TRAM allowed it to be completed remotely using developmentally appropriate interfaces, which aided in its completion.
- Transition is not static and further evaluation of the TRAM is warranted in young people to assess transition readiness longitudinally.

## Introduction

Ensuring a smooth transition process from paediatric to adult healthcare services has been a significant challenge for healthcare providers in recent years. Young people with chronic somatic conditions usually undergo a review when they reach the service transfer boundary<sup>1</sup>; however, in the mental healthcare setting an assessment of transition readiness and appropriateness of young people to transfer has not been well developed. Transition in mental health services refers to the process of young people moving from child and adolescent mental health services (CAMHS) to adult mental health services (AMHS – specialist adult teams and community-based services)<sup>2</sup>, the boundary being the age at which they can no longer access care from CAMHS (16-18 years old in Europe). Amongst countries in the European Union, only Denmark and the U.K. have guidelines detailing how the process should be managed, and only 40% of member states have facilities for transition planning<sup>3</sup>. Despite this, transition transfer across the CAMHS - AMHS boundary has received less research attention than transitions in other healthcare settings, such as for young people with chronic conditions<sup>4-7</sup> or special healthcare needs<sup>8</sup>.

Transition in the mental health setting requires a multidimensional approach that covers a young person's psychosocial, educational and vocational needs. Various assessments of improving transition outcomes have been developed<sup>9-16</sup>. Some explore the readiness for transition, such as treatment engagement, medication use and housing<sup>10</sup>, while others have focused specifically on the readiness for transition<sup>12</sup> or assessing the quality of interaction in service user/practitioner relationships<sup>13</sup>. The current evidence base does not suggest that one measure of transition might be more efficacious than another, however, in the mental healthcare setting it seems that certain components might be more useful than others. Some of the core components have been described and encompass measures that include the readiness, planning, transfer of care and transfer of completion<sup>17</sup>. The Transitions of Care from Child and

1  
2  
3 Adolescent Mental Health Services to Adult Mental Health Services (TRACK study)<sup>18,19</sup> noted  
4 that youth reaching the CAMHS transition boundary have variable outcomes, including  
5 inadequate transition procedures and disengagement from services. These factors can have a  
6 significant health economic impact on young people and their families<sup>20</sup>. Others have shown  
7 that transition should be both personalised and flexible, and crucially incorporate the  
8 perspectives of young people<sup>21</sup>.  
9

10 A mapping survey of 28 EU countries showed that the characteristics of CAMHS to AMHS  
11 transition services varies in terms of distribution of services, funding and user access<sup>22</sup>. This  
12 implies that not enough resources and funds have been allocated to prevent discontinuity of  
13 care at the transfer boundary and that disengagement from services may be a significant  
14 problem across the continent. Furthermore, whilst new national and international initiatives are  
15 clearly warranted, tools to inform decision-making at the transfer boundary and to enable  
16 reliable and consistent assessment of transition outcomes are also urgently needed. It is for this  
17 reason that a bespoke suite of measures, focusing on transition of young people from CAMHS  
18 to AHMS, was developed within the European Union (EU) funded Managing the Link and  
19 Strengthening Transition from Child to Adult Mental Health Care in Europe (MILESTONE)  
20 study<sup>23</sup>. The MILESTONE suite of measures comprises the Transition Readiness and  
21 Appropriateness Measure (TRAM), for assessing whether transition is appropriate for any  
22 young person who is approaching their transfer boundary in CAMHS, and whether they are  
23 ready for it, and the Transition Related Outcome Measure (TROM), which evaluates the  
24 outcomes of transition. The TRAM is currently being used within the MILESTONE cluster  
25 randomised controlled trial as one of the components of the MILESTONE study<sup>23</sup> to inform  
26 “Managed transition” in the intervention arm. The present paper presents the findings on the  
27 validation of the TRAM.  
28  
29  
30  
31  
32  
33  
34  
35  
36  
37  
38  
39  
40  
41  
42  
43  
44  
45  
46  
47  
48  
49  
50  
51  
52  
53  
54  
55  
56  
57  
58  
59  
60

## Methods

The methods linked with the development and validation of the TRAM have been described previously<sup>24</sup>. Figure 1 summarises the main stages, methods and analyses; only the key points are mentioned here. The US FDA Guidance for Patient-reported Outcome Measures (PROM) was followed<sup>25</sup> by beginning with a literature review on transitioning, which was followed by an expert panel review, a focus group phase measure consisting of development and translation (so that the testing of the web-based versions could take place in the eight European Union countries participating in the MILESTONE study<sup>23</sup>), and finally a two-phase process. The first phase (MILESTONE validation study) involved 100 adolescents (pre-transition), young adults (post-transition), parents/carers and both CAMHS and AMHS clinicians and assessed content validity, construct validity and test-retest reliability. Participants completed the TRAM plus other existing measures (Figure 1). The second phase involved over 1000 young people as part of the MILESTONE cohort study and nested cluster randomised trial and assessed the responsiveness and interpretability of the TRAM and the psychometric properties (apart from test-retest). All study participants gave informed consent as per study guidelines. The MILESTONE study protocol was approved by the UK National Research Ethics Service (15/WM/0052). Ethics approval was also granted by the ethics boards in the different MILESTONE participating centres; for London, this was the NRES Committee London - Camberwell St Giles (reference: 14/LO/1049). A complete list of all the ethics committees that provided ethical approval are provided in Supplementary Information Table 1. Data collection was part of the MILESTONE study, which has been described elsewhere alongside a detailed summary of the measures that were completed by participants and subsequently used in the validation of the TRAM<sup>23</sup>.

Internal consistency of the TRAM was calculated by means of the Cronbach's alpha. The Pearson's product moment correlation between three existing measures (Health of the Nation



1  
2  
3 Outcome Scale for Children and Adolescents [HoNOSCA]<sup>26,27</sup> scale, Clinical Global  
4 Impression Severity [CGI-S]<sup>28</sup> scale & Specific Levels of Functioning [SLOF] scale<sup>29</sup>) and the  
5  
6 new rating scales was calculated to assess whether the scores of the TRAM are related to scores  
7  
8 on other instruments. Factor analysis was conducted to determine the underlying structure of  
9  
10 the TRAM subscales and to identify patterns and characteristics of the factors. Results of the  
11  
12 second phase of validation will also be used to inform modifications to the scale, in particular  
13  
14 to improve the utility and accessibility of the measure and minimise completion burden.  
15  
16  
17

18  
19 To assess whether the demographic characteristics were related to the TRAM subscales we  
20  
21 estimated the deprivation index. The deprivation index was developed based on comparable  
22  
23 variables present in the Jarman Index that is a widely used indicator for social deprivation<sup>30,31</sup>.  
24  
25 In the context of the present study, the variables of the deprivation index were captured using  
26  
27 the sociodemographic variables in the Sociodemographic Interview for the Parent. The  
28  
29 following variables were used to estimate the deprivation index (a) employment of parents  
30  
31 versus unemployed, (b) if the young person was attending school or not, (c) lone parent, (d)  
32  
33 ethnic minority, (e) parental history of mental illness (f), socioeconomic factors i.e. receiving  
34  
35 state financial support and (g) level of parental education.  
36  
37  
38  
39  
40

### 41 **Patient and Public Involvement**

- 42  
43  
44 ➤ Patients were involved in the development of the TRAM by taking part in focus groups  
45  
46 and to discuss important themes to be assessed by the TRAM, and by piloting the initial  
47  
48 versions of the measure.  
49  
50  
51 ➤ Young Project Advisors were involved in the project to see how it could be  
52  
53 implemented and how the changes could be adopted by current mental health transition  
54  
55 services.  
56  
57  
58  
59  
60

## Results

### Development of the TRAM

#### *Literature review*

The detailed review of current literature and measures on transition in both mental and physical health resulted in a list of 64 items of potential importance, grouped into three main domains - diagnosis, risk and functioning - forming the core structure of the TRAM.

#### *Expert panel*

It was decided that the TRAM should include questions on potential barriers to a successful transition (e.g. young people not being able to act independently, not being motivated to manage their conditions or not understanding their conditions), as these reflect the young persons' readiness for and functioning related to transition. Furthermore, it was hoped that addressing such issues within the TRAM would emphasise the need for CAMHS and AMHS to work together before and/or during transition. The TRAM also considered the young person's desired level of parental involvement, the ease with which they formed clinical relationships and whether they were able to discuss their mental health history. These elements were also deemed relevant for services to understand to avoid difficult or tricky situations that may potentially derail transition.

#### *Focus groups*

Focus groups were held with young people with experience of CAMHS and transition to AMHS (if applicable), parents and carers, CAMHS professionals and AMHS professionals. During the focus group discussions, young people voiced that 'life events' should be taken into account when deciding about transition. A large number of recent life events was thought to suggest a greater need for AMHS. These raise some important points that need to be considered during transfer when developing readiness measures. Health transitions are only one of several life transitions during adolescence and young adulthood. Other factors also need to be taken

1  
2  
3 into account during the transition period such as those relating to educational and social  
4 transitions including moving from parental home to independent living. Participants in the  
5 focus groups also identified the level of external support as being an important consideration  
6 when making transition plans, as those with less external support may have a greater need for  
7 continued statutory services. Young people, parents and CAMHS clinicians ranked social  
8 support and housing as important more often than the expert panel or AMHS clinicians. Poor  
9 engagement with tasks, lack of meaningful occupation and cognitive factors were considered  
10 the least important factors to consider when making a transition decision by all categories of  
11 participants. Questions relating to these issues were therefore removed from subsequent  
12 versions of the scale.  
13  
14  
15  
16  
17  
18  
19  
20  
21  
22  
23  
24  
25

### 26 ***Organisation of items within subscales***

27  
28 Once the final list of items had been decided, the organisation of these items was discussed  
29 with further focus groups and the MILESTONE expert panel. Based on this feedback, the  
30 preliminary version of the TRAM included domains A-F, which capture the ‘appropriateness’  
31 of transition, and G and H, which capture ‘readiness’ for transition, as follows:  
32  
33  
34  
35  
36

#### 37 (A) Symptoms

38  
39 Frequency and severity of symptoms to include depression, mania, anxiety, post-traumatic  
40 stress, psychosis, personality disorder, antisocial personality disorder, attention deficit, social  
41 communication, eating difficulties and other mental health conditions.  
42  
43  
44  
45

#### 46 (B) Overall illness

47  
48 This considered severity, taking into account all symptoms across all existing conditions.  
49

#### 50 (C) Overall disruption

51  
52 Effect of symptoms on functioning with respect to self-care, sleep, household chores,  
53 community, social, responsibility, relationships with family, friends/partner, peers/colleagues  
54 and education/work performance.  
55  
56  
57  
58  
59  
60

1  
2  
3 (D) Risk factors  
4

5 Frequency and severity of stress, risk taking behaviour, self-harm (no suicidal intent), suicidal  
6 thoughts, behaviours that risk harm to others and behaviours that risk harm from others.  
7

8  
9  
10 (E) Factors affecting symptoms  
11

12 Including need for ongoing treatment, inpatient admissions, relapse, side effects to medication,  
13 physical health comorbidities and drug and alcohol abuse.  
14

15  
16  
17 (F) Health system factors  
18

19 The health system factors that may affect a clinicians' transition decision include items such as  
20 financial implications of a transition to AMHS, the quality of the links between CAMHS and  
21 AMHS, the appropriateness of available statutory services, the availability of alternative  
22 services and the skills of local GPs with regard to mental health when treating a young person's  
23 condition.  
24  
25  
26  
27  
28  
29

30 (G) Barriers to functioning  
31

32 Including inability to act independently, poor understanding of condition, lack of knowledge  
33 on how to access services, lack of motivation, poor adherence to medication, lack of social  
34 support, not wanting carers to be involved, difficulty forming relationships with treatment team  
35 and difficulty repeating mental health history.  
36  
37  
38  
39  
40  
41

42 (H) Other life changes  
43

44 Other life changes (positive or negative) relating to family relationships, relationships with  
45 friends and partner, moving home, school/college/work, illness/death, police involvement,  
46 pregnancy and other.  
47  
48  
49

50 Both the frequency of symptoms and the severity of impairment (A [symptoms] and D [risk])  
51 were assessed, as advised by focus groups participants. Again, following participant feedback,  
52 the severity of each symptom was recorded separately but a single assessment of impairment  
53 was made across all symptoms and conditions. Focus group participants also considered which  
54  
55  
56  
57  
58  
59  
60

1  
2  
3 options for assessing frequency and severity would be most appropriate. For frequency, the  
4  
5 most popular choice was a 6-point ordinal scale (from not experienced in the past 6 months  
6  
7 ranging to all of the time) and for severity, a 5-point ordinal scale (from very mild ranging to  
8  
9 very severe). Unduly convoluted medical language was removed, and participants reported no  
10  
11 major issues with completion of the scale. Experts in the field were asked to review the  
12  
13 proposed scale. The agreed test version was translated into Croatian, Dutch, French, German,  
14  
15 and Italian using a back-translation process<sup>32</sup> and, after final checks, uploaded on the  
16  
17 HealthTracker™ system, a web-based portal for online measures.  
18  
19  
20  
21  
22  
23  
24  
25  
26  
27  
28  
29  
30  
31  
32  
33  
34  
35  
36  
37  
38  
39  
40  
41  
42  
43  
44  
45  
46  
47  
48  
49  
50  
51  
52  
53  
54  
55  
56  
57  
58  
59  
60

## **Validation of the TRAM**

In the first phase, the three versions of the TRAM were completed by a total of 36 adolescents (AD), 29 parents/carers (PC) and 35 clinicians (CL) respectively.

In the main MILESTONE study (second phase), the TRAM was completed by a total of 932 AD, 752 PC and 849 CL.

### ***First Phase***

#### **Test-retest Reliability**

In order to assess test-retest reliability, Pearson's correlation coefficients were calculated between responses per the first and subsequent completion (a maximum of 41 days after the first assessment) for each sub-scale and version (AD, PC, CL) of TRAM. There were 36 AD, 29 PC and 35 CL completed TRAM's available for the test-retest reliability analysis. The results are summarised in Table 1 A and B. There was moderate ( $> 0.5$ ) correlation<sup>33</sup> between test-retest scores for all versions (AD, PC, CL) and all sub-scales.

### ***Second Phase***

Demographics for the adolescent (AD), parent/carer (PC) and clinician (CL) sample are presented in Supplementary Information Tables 2 and 3. The psychometric properties of the AD, PC and CL versions of the TRAM and all sub-scales for the larger sample are described in the next section.

#### **Internal Consistency (Reliability)**

Cronbach's alpha was calculated for all versions of the TRAM (AD, PC, and CL versions) for the following sub-scales; Symptoms, Overall disruption, Barriers to functioning, Risk factors and Factors affecting symptoms. Alpha ( $\alpha \geq 0.70$ ) is considered acceptable evidence of internal reliability<sup>34</sup>. The consistency of responses between versions (AD, PC and CL) was assessed using Pearson's correlation coefficient. The internal consistency of the symptoms sub-scale was shown to be high for the AD version ( $\alpha = 0.804$ ), acceptable for the PC version ( $\alpha = 0.759$ )

1  
2  
3 and moderate for the CL version ( $\alpha = 0.552$ ). The AD version for symptoms moderately  
4 correlated with the PC and CL version of the symptom sub-scale ( $r = 0.517, p < 0.01$  and  $r =$   
5  $0.396, p < 0.01$ , respectively). Additionally, the PC version and CL version of the symptom  
6 sub-scale also revealed a moderate correlation ( $r = 0.393, p < 0.01$ ). The overall disruption  
7 subscale demonstrated high levels of internal consistency for all versions of the scale (AD  
8 version,  $\alpha = 0.869$ ; PC version,  $\alpha = 0.882$ , CL version,  $\alpha = 0.877$ ). The AD version for overall  
9 disruptions correlated with the PC and CL version of the overall disruption sub-scale ( $r = 0.420,$   
10  $p < 0.01$  and  $r = 0.380, p < 0.01$ , respectively). Furthermore, the PC version and CL version of  
11 the overall disruption sub-scale also revealed a moderate correlation ( $r = 0.505, p < 0.01$ ).

12  
13  
14 The barriers to functioning sub-scale scored adequate reliability for the PC and CL versions ( $\alpha$   
15  $= 0.725$  and  $0.714$ , respectively) with the AD version demonstrating slightly lower consistency  
16 ( $\alpha = 0.616$ ). The AD version for barriers to functioning sub-scale moderately correlated with  
17 the PC and CL version of the overall disruption sub-scale ( $r = 0.327, p < 0.01$  and  $r = 0.401, p$   
18  $< 0.01$ , respectively). Furthermore, the PC and CL version of the barriers to functioning sub-  
19 scale also revealed a moderate correlation ( $r = 0.380, p < 0.01$ ).

20  
21  
22 The risk factors sub-scale achieved adequate levels of internal consistency for the AD version  
23 ( $\alpha = 0.735$ ), with the PC and CL versions revealing slightly lower consistency ( $\alpha = 0.654$  and  
24  $0.684$ , respectively). Once again, the AD version for risk moderately correlated with the PC  
25 and CL version of the risk sub-scale ( $r = 0.552, p < 0.01$  and  $r = 0.557, p < 0.01$ , respectively).  
26 Similarly, the PC version and CL version of the risk sub-scale also revealed a moderate  
27 correlation ( $r = 0.529, p < 0.01$ ).

28  
29  
30 The factors affecting symptoms sub-scale did not exceed a Cronbach's alpha of 0.70 for all  
31 versions (AD version  $\alpha = 0.554$ , PC version  $\alpha = 0.565$ , CL version  $\alpha = 0.522$ ), with the AD  
32 version of the factors affecting symptoms sub-scale moderately correlating with the PC and CL  
33 version ( $r = 0.610, p < 0.01$  and  $r = 0.389, p < 0.01$ , respectively). This relationship was also  
34  
35  
36  
37  
38  
39  
40  
41  
42  
43  
44  
45  
46  
47  
48  
49  
50  
51  
52  
53  
54  
55  
56  
57  
58  
59  
60

1  
2  
3 seen for the PC and CL versions of the factors affecting symptoms sub-scale ( $r = 0.452, p <$   
4  
5 0.01).  
6

7  
8 The performance of the symptoms sub-scale for CL and the Factors Affecting Symptoms sub-  
9  
10 scale for AD, PC and CL, fell below the minimum acceptable threshold. We therefore explored  
11  
12 whether deletion of particular items might improve this and found that by removing the item  
13  
14 relating to “Attention deficit” from the CL Symptoms sub-scale, it would increase to 0.587.  
15  
16 We also found that by removing the item about “Medical comorbidity” from the Factors  
17  
18 Affecting Symptoms sub-scale (AD, PC, CL), reliability would increase to 0.573 for the AD,  
19  
20 0.593 for the PC and 0.548 for the CL. Consequently, they were retained in the TRAM.  
21  
22

### 23 Correlations with other existing measures

24  
25 To assess whether the TRAM could conceptually overlap with other existing instruments also  
26  
27 completed by MILESTONE participants, the Pearson’s product moment correlation coefficient  
28  
29 was calculated between each TRAM subscale and the gold standard HoNOSCA<sup>26,27</sup> and the  
30  
31 CGI-S<sup>28</sup> (Table 2). The Pearson’s product moment correlation coefficients for the TRAM sub-  
32  
33 scales with HoNOSCA and CGI scales showed moderate correlations. Apart from the CGI  
34  
35 (clinician version) for the symptoms and overall disruption, the correlation coefficients were  
36  
37 all low ( $<0.500$ ) suggesting a modest relationship between the TRAM sub-scale and  
38  
39 HoNOSCA and CGI-S scores.  
40  
41  
42  
43

44  
45 Pearson’s correlations were also determined between each TRAM subscale and the parent  
46  
47 version of a behavioural rating scale: SLOF. The SLOF allows the capture of symptomatology  
48  
49 using observable behavioural function in those with psychiatric illness<sup>29</sup>. The subscale scores  
50  
51 of the TRAM were analyzed to see how well they correlate with the SLOF scale (AD, PC and  
52  
53 CL) (Table 3). The Pearson’s correlation between the TRAM sub-scales and SLOF Subscales  
54  
55 showed moderate associations. However, while the HoNOSCA and CGI showed significant  
56  
57 correlations with the TRAM scales, albeit moderate relationships, the SLOF scale revealed  
58  
59  
60



1  
2  
3 poor relationships (non-significant correlations) between some constructs measured by the  
4 former two scales.  
5  
6

### 7 8 Exploratory Factor Analysis 9

10 Exploratory factor analysis (EFA) (principal axis, Promax rotation) was undertaken to model  
11 the interrelationships between the items in the TRAM and was performed on the adolescent  
12 version of the TRAM's sub-scales. The TRAM was developed to assess whether transition is  
13 appropriate and whether the young person is ready for it. Based on this premise, the adolescent  
14 version of the scale was chosen as it was deemed to be the most relevant version clinically to  
15 explore the interrelationship between the items.  
16  
17

18 The first set of EFAs was performed without a set number of factors, these analyses showed  
19 that for 'symptoms' and 'factors affecting symptoms' sub-scales a two factors model in line  
20 with the clinical knowledge can explain the relationship between the items of the sub-scales  
21 (see Table 4 for the details of the factors). These analyses, however, did not produce meaningful  
22 models for the 'overall disruption', 'risk factors' and the 'barriers to functioning' sub-scales.  
23 Therefore, another set of EFAs were performed where the number of factors were set on two  
24 for the 'overall disruption', 'risk factors' and three for 'barriers to functioning' sub-scales.  
25 These EFAs returned for all the three sub-scales models which satisfy both statistical and  
26 clinical criteria. In the 'barriers to functioning' subscale, the three factors were identified based  
27 on clinical knowledge of barriers that might impede functioning such as 'Patient Factors',  
28 'Family Support', and 'Treatment'. Table 4 summarises the results of EFAs for the TRAM  
29 subscales. For all the sub-scales and the items were clustered based on clinical relevance.  
30  
31  
32  
33  
34  
35  
36  
37  
38  
39  
40  
41  
42  
43  
44  
45  
46  
47  
48  
49

### 50 Deprivation Index 51

52 An approximate measure of deprivation was estimated by creating the Deprivation Index. The  
53 deprivation index correlations with the overall TRAM subscale scores in the AD, PC and CL  
54 version are shown in Table 5. The deprivation index correlated significantly with the AD, PC  
55  
56  
57  
58  
59  
60

1  
2  
3 and CL versions of the Overall Disruption Subscale. Pearson correlations were significant for  
4  
5 the PC and CL version but not the AD version of the Symptoms and Risk factors subscale.  
6  
7  
8  
9  
10  
11  
12  
13  
14  
15  
16  
17  
18  
19  
20  
21  
22  
23  
24  
25  
26  
27  
28  
29  
30  
31  
32  
33  
34  
35  
36  
37  
38  
39  
40  
41  
42  
43  
44  
45  
46  
47  
48  
49  
50  
51  
52  
53  
54  
55  
56  
57  
58  
59  
60

For peer review only

## Discussion

This current manuscript reports on the development and validation of the Transition Readiness and Appropriateness Measure (TRAM). The TRAM was designed and worded specifically so that it can be completed online, optimising both completion time and accessibility; thus, increasing its potential applicability in an adolescent/young adult population. The benefit of following the rigorous FDA process while developing TRAM was that feedback on potential items was gained early on from end users. Importantly, items such as diagnosis, risk and functioning were identified as important items in the transition decision-making process. The psychometric analyses revealed that the TRAM is a reliable and valid instrument for assessing transition. The TRAM had good reliability for all versions and showed moderate to low correlations when pitted with other established instruments. This finding supports the use of TRAM to assess transition readiness, as higher correlations would imply that the TRAM was not adding anything new when compared to existing measures such as HoNOSCA. The goal of the TRAM to assess readiness and appropriateness were met because the TRAM was holistic in its scope to explore the key items that captured the overarching themes relating to transition readiness and appropriateness.

When looking more closely at the correlations of the TRAM, there were conceptual differences between the TRAM subscales and existing instruments. Regarding the HoNOSCA, the Pearson's correlations were all below 0.500 for the different versions suggesting a modest relationship between the HoNOSCA total score and TRAM subscale scores. Previous studies that have assessed the correlations between the HoNOSCA total score and other instruments such as the parent & clinician rated Children's Global Assessment Scale<sup>35</sup> and the Global Assessment of Psychosocial Disability<sup>36</sup> have reported moderate correlations ranging from 0.4 to 0.6. The present study also reported modest correlations between the TRAM subscale and HoNOSCA total scores suggesting that conceptually the instruments measure different

1  
2  
3 elements of transition. A similar reasoning can be put forward when examining the TRAMs  
4 performance with the CGI. The CGI considers aspects of three different global measures (i)  
5 severity of illness (CGI-S), (ii) global improvement and (iii) efficacy index<sup>28</sup>. In the context of  
6 this study, the CGI-S was considered and embodies all the aspects regarding the overall severity  
7 of symptoms of the young person into a single score. In comparison, the TRAM sub-scales are  
8 more specific. The sub-scales of the SLOF make it conceptually closer to the TRAM in terms  
9 of looking at the functioning aspects of transition when compared to the HoNOSCA or CGI-I.  
10 Although there was not a complete overlap, it was easier to classify individual correlations  
11 based on their meaningfulness. As expected, there were poor correlations (not significant) that  
12 can be explained by a conceptual difference between the construct measured by SLOF (that  
13 does not specifically focus on transition readiness) and TRAM sub-scales.  
14

15 From a clinical viewpoint, the EFA for the adolescent version showed that a two factors model  
16 was the most suitable for the 'symptoms', 'overall disruption', 'risk factors' and 'factors  
17 affecting symptoms' TRAM subscale. The items were grouped together based on clinical  
18 judgement, for example, in the 'symptoms' subscale the items anxiety and depression were  
19 grouped together in factor 1 while antisocial behaviour and mania were categorised together in  
20 factor 2. In some instances, however, some items had lower loading values. The item 'other  
21 mental health' had a loading score of 0.186 in the 'symptoms' subscale suggesting a weaker  
22 association in comparison to the other items in this subscale. There is, however, no rule of  
23 thumb regarding the optimal strength of factor loadings and thresholds. Indeed, one  
24 meta-analysis of the variance in factor loading has shown that there is no agreement to what  
25 constituents a high or low factor loading<sup>37</sup>. The items anxiety and depression clustered together  
26 with factor loading scores greater than 0.7 reflecting a higher degree of impact these items have  
27 when a young person prepares for transition. Similarly, in the 'risk factors' subscale the items  
28 'suicidal thoughts behaviours' and 'self-harming behaviours' had the highest factor loading  
29  
30  
31  
32  
33  
34  
35  
36  
37  
38  
39  
40  
41  
42  
43  
44  
45  
46  
47  
48  
49  
50  
51  
52  
53  
54  
55  
56  
57  
58  
59  
60

1  
2  
3 scores in comparison to the other items indicating that when it comes to risk and how it impacts  
4  
5 on the preparedness of when a young person's transition, suicidal thoughts and self-harming  
6  
7 behaviours are two elements that can have a significant impact on how a young person  
8  
9 navigates transition. The barriers to functioning subscale revealed a three-factor model. On  
10  
11 closer examination, while five items clustered together in factor 1, the item 'knowledge of  
12  
13 accessing services' had the highest factor loading score in this factor. Interestingly, this score  
14  
15 was higher than the 'ability to act independently' score. This observation suggests that when it  
16  
17 comes to examine the barriers of transition, knowledge of accessing services are more  
18  
19 important than whether the young person has the ability to act independently or understands  
20  
21 the degree of how the severity of their mental illness will impact on the transition process. This  
22  
23 point is echoed in the literature and supports the overarching theme voiced by young people  
24  
25 and others that transition from CAMHS to AMHS should be individualised and be flexible  
26  
27 enough to manage the obstacles encountered during the transition process<sup>17,21,22,38</sup>. Despite this,  
28  
29 the ability to act independently should not be understated. Young people will have different  
30  
31 developmental milestones during their transition journey. This is particularly important during  
32  
33 the latter stages of transition which often takes place in young adulthood as the brain is still  
34  
35 developing. From a neurodevelopmental perspective this point should not be taken lightly by  
36  
37 services who sometimes forget that even at this stage of the transition process they are dealing  
38  
39 with developing young people. Overall, these findings showed that the items could be mapped  
40  
41 onto readiness and appropriateness. This will form the basis of a transition passport that will  
42  
43 assist in the identification of high-risk cases or those who can be appropriately discharged or  
44  
45 transitioned to another community service. The transition passport will be described elsewhere.  
46  
47  
48  
49  
50  
51  
52  
53  
54  
55  
56  
57  
58  
59  
60  
The study was able to estimate a deprivation index based on sociodemographic variables  
captured as part of the MILESTONE study and showed a significant relationship with the  
'Overall Disruption Subscale' in all versions of the scale, and the Parent and Clinician version

1  
2  
3 of the 'Symptoms' and 'Risk Factors' Subscale. This is not surprising as these subscales have  
4 items grouped according to relationships, internalising/externalising symptoms and risk and  
5 these factors would be related to the sociodemographic aspects assessed using the deprivation  
6 index. While there are several indices that can be used for outcome services, the Jarman Index  
7 can be used as a proxy for deprivation and while some evidence has shown that it might not be  
8 entirely suited to the planning of healthcare outcomes<sup>39</sup>, we have used elements of it to estimate  
9 a deprivation index that showed significant inter-relationships with TRAM subscales.

### 19 **Strengths and limitations**

20  
21 The TRAM has a dual purpose: To identify who should be transitioned to adult mental health  
22 services and to pinpoint areas which should be considered or addressed to ensure that the  
23 transition process is smooth. The barriers to a successful transition are areas which clinicians  
24 on both sides of the transfer boundary can work on to improve the ease of transition. These  
25 barriers include young people not being ready to act as an independent adult; young people not  
26 understanding their mental health condition or not being motivated to manage their condition;  
27 not having social support, not easily building therapeutic relationships and not easily being able  
28 to repeat history. The TRAM score summary report contains the TRAM responses of the YP,  
29 PC and CL, presented in visually attractive graphs and tables, and serves as a clinician decision  
30 support tool and communication aid. Yellow highlights help clinicians focus on items requiring  
31 attention. If a referral to adult services seems appropriate for the young person but barriers are  
32 highlighted, the clinician can add these to the care plan and address them in a timely fashion to  
33 help smoothen the transition process. Moving forward, based on the TRAM validation study  
34 findings, a MILESTONE Transition Predictor will be developed on the HealthTracker™  
35 platform, to be used in association with the TROM. As transition is dependent on symptoms  
36 clusters, the Transition Predictor will be able to provide a personalised transition approach  
37 depending on symptom profiling. This will involve using a traffic light scoring system to a  
38  
39  
40  
41  
42  
43  
44  
45  
46  
47  
48  
49  
50  
51  
52  
53  
54  
55  
56  
57  
58  
59  
60

1  
2  
3 modified TRAM score summary report to predict the outcome of transition based on symptom  
4 profiling. Together with the TROM, these clinical decision-making tools will be valuable in  
5  
6 identifying cases who need to transition based on symptomatology and then to assess the  
7  
8 outcomes of the transition process. Young person's undergoing transition present with complex  
9  
10 psychopathology and as such those participants who were the most severely ill or less engaged  
11  
12 with the transition process are least likely to have responded. Notwithstanding these concerns,  
13  
14 the measure is still likely to be useful in these high-risk groups and would be beneficial for  
15  
16 healthcare practitioners. Despite the focus groups not having patients who were very ill, the  
17  
18 validation was done in a mixed group of patients with multiple disorders of varying complexity  
19  
20 and hence shows that the TRAM can be used in complex psychopathology. The present study  
21  
22 was also unable to assess transition readiness and how it can evolve over across time. This  
23  
24 would be important given that young people are likely to have several transitions during their  
25  
26 transition journey and although the TRAM did not capture transition from other services i.e.,  
27  
28 within social care, it could still be used as a foundation to develop similar measures for other  
29  
30 services. Future work would need to explore transition readiness in young people during their  
31  
32 entire transition journey and the usefulness of TRAM across other age-based services.  
33  
34  
35  
36  
37  
38  
39

## 40 **Conclusion**

41  
42 The current study suggests that the TRAM is a viable instrument for determining the readiness  
43  
44 of a young person and the appropriateness for transition from CAMHS. It is holistic in its scope  
45  
46 to ensure that the young person is seen as more than a list of symptoms and assessment involves  
47  
48 not only clinicians but also young people and their parents/carers. Being web-based allows the  
49  
50 measure to be used across countries by end users and enriches the transition process from  
51  
52 CAMHS to AMHS. This means that the TRAM has the potential to be used worldwide by end  
53  
54 users thereby contributing to a smoother transition process and allowing for personalised  
55  
56 mental health care. Ultimately this will have added value in informing the transition process  
57  
58  
59  
60

1  
2  
3 from CAMHS to AMHS. The TRAM is designed to work in conjunction with an instrument  
4  
5 that examines the outcome of transition.  
6  
7  
8  
9  
10  
11  
12  
13  
14  
15  
16  
17  
18  
19  
20  
21  
22  
23  
24  
25  
26  
27  
28  
29  
30  
31  
32  
33  
34  
35  
36  
37  
38  
39  
40  
41  
42  
43  
44  
45  
46  
47  
48  
49  
50  
51  
52  
53  
54  
55  
56  
57  
58  
59  
60

For peer review only



## Funding

Funding for the MILESTONE project was given by the EU Seventh Framework Programme (grant number: 602442).

## Author Contributions

PS is the Principal Investigator; JS, HT and JW wrote the manuscript and alongside SG, ND and KDC assisted in revising the subsequent versions. NH, ISO, MM, AP, EG, LM, GS, GA, FM, FR, VS and RA recruited subjects and were involved in data collection/management. LA, KL, HT and PT were involved in recruitment and the focus groups. FF was responsible for the data management component and subsequent analyses for the validation. SPS is the Chief Investigator of the MILESTONE project and obtained funding together with AM, CS, DPO, DW, FV, FMc, GD, GdG, JM, MP, PS, ST, TF and US. AT, AW and CG served as young project advisors and helped with the development of the TRAM. All authors critically reviewed the protocol and the manuscript and gave approval for the publication.

## Acknowledgements

### **The MILESTONE consortium: members and partner institutions:**

Swaran Singh, Helena Tuomainen, Jason Madan, Jane Warwick, Cathy Street, Dieter Wolke, Moli Paul, Claire Daffern, Priya Tah, Rebecca Appleton, Alastair Canaway, James Griffin, Philip Wells, Rose-Marie Lomax (University of Warwick, UK), Giovanni de Girolamo, Giulia Signorini, Alessandro Ferrari, Cecilia Ferrari, Laura Rivolta, Flavia Levi, Lidia Manenti, Eliza Gheza, Adriana Pastore, Maria Cataldo, Giorgia Morini, Cecilia Toselli, Pamela Stagni, Pamela Varvara (IRCCS Istituto Centro San Giovanni di Dio Fatebenefratelli, Brescia, Italy), Giovanni Allibrio, (ASST of Spedali Civili, Brescia, Italy), Ottaviano Martinelli (ASST Lecco, Italy), Patrizia Conti (ASST Lariana), Emiliano Monzani (Niguarda Metropolitan Great Hospital, Italy), Francesco Rinaldi (ASST of Valcamonica, Italy), Francesco Margari, Lucia Margari (University of Bari, Italy), Paola Stagi, Fabrizio Starace (Modena, Italy), Giuseppe Carrà (San Gerardo Hospital, Italy), Renata Nacinovic (ASST Monza, Italy), Paolo Scocco, Michela Gatta (DISM, Italy), Fabio Vanni, Sabrina Ferrari (AUSL of Parma, Italy), Marco Armando (Child Neuropsychiatric Unit, Department of Neuroscience, Bambino Gesù Children's Hospital, IRCCS, Rome, Italy; Department of Psychiatry of the University of

1  
2  
3 Geneva, Switzerland), Stefano Vicari (Child Neuropsychiatric Unit, Department of  
4 Neuroscience, Bambino Gesù Children's Hospital, IRCCS, Rome, Italy), Angelo Bertani  
5 (ASST Santi Paolo e Carlo, Italy), Edda Zanetti (ASST Spedali Civili, Brescia, Italy), Paramala  
6 Santosh, Leighton McFadden, Natalie Heaney, Mathilde Mastroianni, Federico Fiori, Jatinder  
7 Singh, Ilyas Sagar-Ouriaghi, Cassandra Deane (Kings College London, UK), Laura Adams  
8 (Plymouth University, UK), Diane Purper-Ouakil, Frédérick Russet, Virginie Maurice,  
9 Véronique Humbertclaude (Hôpital Saint Eloi, France), Renaud Jardri, Aesa Parenti (Centre  
10 Hospitalier Universitaire de Lille, France), David Da Fonseca, Isabelle Charvin (Centre  
11 Hospitalier Universitaire de Marseille, France), Frédérique Bonnet-Brilhault, Chrystèle Bodier,  
12 Catherine Prigent (Centre Hospitalier Universitaire de Tours, France), Mario Speranza, Hélène  
13 Lida-Pulik (CH Versailles, France), Athanasios Maras, Larissa van Bodegom, Mathilde  
14 Overbeek, Esther Kooymans, Iris Link (Yulius Academie, the Netherlands), Ulrike Schulze,  
15 Melanie Saam, Ulrike Breuninger, Jörg Fegert, Sonja Aslan, Sarah Miller (University of Ulm,  
16 Germany), Renate Schepker, Beata Williams, Anne Sartor, Elena Tanase (ZfP  
17 Südwürttemberg, Germany), Nichele Noterdaeme, Vehbi Sakar, Carolin von Bentzel  
18 (Josefinum Augsburg, Germany), Sabine Tremmery, Gaëlle Hendrickx, Veronique De Roeck  
19 (KU Leuven, Belgium), Fiona McNicholas, Lesley O'Hara, Rachael McKenna, Aleksandra  
20 Gronostaj, Ingrid Holme (University College Dublin, Ireland), Tomislav Franić, Nikolina  
21 Davidović (University Hospital Split, Croatia), Vlatka Kovač, Katarina Dodig-Ćurković  
22 (University of Osijek, Croatia), Frank Verhulst, Gwen Dieleman, Suzanne Gerritsen (Erasmus  
23 MC, The Netherlands), Kate Lievesley, Helen Furse, Paulina Nikolova, Todor Mutafov, Ivo  
24 Viliev, Vasil Dimov (HealthTracker, UK), Amanda Tuffrey, Anna Wilson, Charlotte Gatherer,  
25 Leanne Walker, Sarah Buttle, Caoimhe Kelly, Meghan Killilea, James Kirwan, Courtney  
26 Smyth, (Young project advisors affiliated with University of Warwick), Andrea Wohner  
27 (concentris research management GmbH, Germany), Nigel Jeffery, Suhas Hydros (Croydon  
28 CAMHS, UK), Richard Church (Lambeth CAMHS, UK), Omer Moghraby (Lewisham  
29 CAMHS, UK); Partha Banerjea (Southwark CAMHS, UK), Genevieve Riley, Pablo Ronzini,  
30 Rosemary Richards (2Gether NHS Foundation Trust, UK), Jo Berriman (South Staffordshire  
31 and Shropshire Healthcare NHS Foundation Trust SSSFT, UK), Vinuthna Pemmaraju (The  
32 Black Country Partnership Foundation NHS Trust, UK), Michael Slowik (Dudley and Walsall  
33 Mental Health Partnership NHS Trust, UK), Ben Rogers, Alan Farmer (Worcestershire Health  
34 and Care NHS Trust, UK), Ashley Liew, Tanveer Sandhu (Birmingham Children's Hospital,  
35 UK).

1  
2  
3 We extend our thanks and appreciation to the MILESTONE project consortium for their  
4 contribution.  
5  
6  
7

8 This project has received funding from the European Seventh Framework Programme for  
9 research, technological development and demonstration under grant agreement no 602442.  
10 This paper reflects only the author's views and the European Union is not liable for any use  
11 that may be made of the information contained therein.  
12  
13  
14  
15  
16  
17

### 18 **Conflicts of Interest**

19  
20 PS is the co-inventor of the HealthTracker™ and is the Chief Executive Officer and  
21 shareholder in HealthTracker Ltd. FF is a Chief Technical Officer and KL is a Project Manager  
22 employed by HealthTracker Ltd respectively.  
23  
24  
25

26  
27 FV is the Dutch distributor of ASEBA from which he receives remuneration.  
28

29 SPS is part-funded by the National Institute for Health Research (NIHR) Collaboration for  
30 Leadership in Applied Health Research and Care WM (NIHR CLAHRC WM).  
31  
32  
33

### 34 **Data availability statement**

35  
36 Reasonable requests from individuals who wish to access the data can be done so by contacting  
37 the corresponding author.  
38  
39  
40  
41  
42  
43  
44  
45  
46  
47  
48  
49  
50  
51  
52  
53  
54  
55  
56  
57  
58  
59  
60

## References

1. While A, Forbes A, Ullman R, et al. (2004). Good practices that address continuity during transition from child to adult care: syntheses of the evidence. *Child: Care, Health and Development*. 30: 439–452.
2. Department of Health (2015). *Future in mind: promoting, protecting and improving our children and young people's mental health and wellbeing*. London: Department of Health Children and Young People's Mental Health Taskforce.
3. Signorini G, Singh SP, Boricevic Marsanic V, et al. (2018). The interface between child/adolescent and adult mental health services: results from a European 28-country survey. *Eur Child Adolesc Psychiatry*. 27: 501-511.
4. Steinkamp G, Ullrich G, Muller C. et al. (2001). Transition of adult patients with cystic fibrosis from paediatric to adult care: the patients' perspective before and after start-up of an adult clinic. *Eur. J. Med. Res*. 6: 85–92.
5. Shaw KL, Southwood TR, McDonagh JE. (2004). Users' perspectives of transitional care for adolescents with juvenile idiopathic arthritis. *Rheumatology*. 43: 770–778.
6. McDonagh JE, Southwood TR, Shaw KL. (2006). Growing up and moving on in rheumatology: development and preliminary evaluation of a transitional care programme for a multicentre cohort of adolescents with juvenile idiopathic arthritis. *J. Child Health Care*. 10: 22–42.
7. Zhang L, Ho J, Kennedy S. (2014). A systematic review of the psychometric properties of transition readiness assessment tools in adolescents with chronic disease. *BMC Pediatr*. 14: 4.
8. Lotstein DS, McPherson M, Strickland B, Newacheck PW. (2005). Transition planning for youth with special healthcare needs: results from the national survey of children with special health care needs. *Pediatrics* 115: 1562–1568.

- 1  
2  
3 9. Sawicki G, Lukens-Bull K. et al. (2011). Measuring the transition readiness of youth with  
4 special healthcare needs: validation of the TRAQ-Transition Readiness Assessment  
5 Questionnaire. *J. Pediatr. Psychol.* 10: 160–171.  
6  
7
- 8  
9  
10 10. Donahue SA, Manuel JI, Herman DB. et al. (2012). Development and use of a transition  
11 readiness scale to help manage ACT team capacity. *Psychiatr. Serv.* 63: 223-229.  
12  
13
- 14 11. Ferris ME, Harward DH, Bickford K. et al. (2012). A clinical tool to measure the  
15 components of health-care transition from paediatric care to adult care: the UNC  
16 TR(x)ANSITION scale. *Ren. Fail.* 34: 744-753.  
17  
18
- 19 12. van Staa A, van der Stege HA, Jedeloo S. et al. (2011). Readiness to transfer to adult care  
20 of adolescents with chronic conditions: exploration of associated factors. *J. Adolesc. Health.*  
21 48: 295-302.  
22  
23
- 24 13. Ware NC, Dickey B, Tugenberg T. et al. (2003). CONNECT: a measure of continuity of  
25 care in mental health services. *Ment. Health Serv. Res.* 4: 209-221.  
26  
27
- 28 14. Hadjistavropoulos H, Biem H, Sharpe D. et al. (2008). Patient perceptions of hospital  
29 discharge: reliability and validity of a Patient Continuity of Care Questionnaire. *Int. J. Qual.*  
30 *Health Care.* 20: 314-223.  
31  
32
- 33 15. Durbin J, Goering P, Streiner DL. et al. (2004). Continuity of care: validation of a new self-  
34 report measure for individuals using mental health services. *J. Behav. Health Serv. Res.* 31:  
35 279-296.  
36  
37
- 38 16. Schwartz LA, Daniel LC, Brumley LD. et al. (2014). Measures of readiness to transition to  
39 adult health care for youth with chronic physical health conditions: a systematic review and  
40 recommendations for measurement testing and development. *J. Pediatr. Psychol.* 39: 588-601.  
41  
42
- 43 17. Cleverley K, Rowland E, Bennett K, Jeffs L, Gore D. (2018). Identifying core components  
44 and indicators of successful transitions from child to adult mental health services: a scoping  
45 review. *Eur Child Adolesc Psychiatry.* 2018 Oct 8  
46  
47  
48  
49  
50  
51  
52  
53  
54  
55  
56  
57  
58  
59  
60

- 1  
2  
3 18. Singh SP, Paul M, Ford T. et al. (2008). Transitions of care from child and adolescent  
4 mental health services to adult mental health services (TRACK study): a study of protocols in  
5 Greater London. *BMC Health Services Research*. 8, 1-7.  
6  
7
- 8  
9  
10 19. Islam Z, Ford T, Kramer T, et al. (2016). Mind how you cross the gap! Outcomes for young  
11 people who failed to make the transition from child to adult services: the TRACK study.  
12 *BJPsych. Bull*. 40, 142-148.  
13  
14
- 15  
16  
17 20. Barr NG, Longo CJ, Embrett MG. et al. (2017). The transition from youth to adult mental  
18 health services and the economic impact on youth and their families. *Health Manage Forum*.  
19  
20  
21 30: 283-288.  
22  
23
- 24 21. Broad KL, Sandhu VK, Sunderji N, Charach A. (2017). Youth experiences of transition  
25 from child mental health services to adult mental health services: a qualitative thematic  
26 synthesis. *BMC Psychiatry*. 17(1): 380.  
27  
28  
29
- 30 22. Signorini G, Singh SP, Marsanic VB. et al. (2017). Architecture and functioning of child  
31 and adolescent mental health services: a 28-country survey in Europe. *Lancet Psychiatry*.  
32  
33  
34 4(9):715-724.  
35  
36
- 37 23. Singh SP, Tuomainen H, Girolamo G. et al. (2017). Protocol for a cohort study of  
38 adolescent mental health service users with a nested cluster randomised controlled trial to  
39 assess the clinical and cost-effectiveness of managed transition in improving transitions from  
40 child to adult mental health services (the MILESTONE study). *BMJ Open*. 7(10): e016055.  
41  
42  
43  
44  
45
- 46 24. Santosh P, et al. (2020). Protocol for the development and validation procedure of the  
47 Managing the Link and Strengthening Transition from Child to Adult Mental Health Care  
48 (MILESTONE) Suite of Measures. *BMC Pediatr*. 20(1):167.  
49  
50  
51
- 52 25. US Department of Health and Human Services Food and Drug Administration. (2009).  
53 Guidance for industry: patient-reported outcome measures: use in medical product  
54  
55  
56  
57  
58  
59  
60

1  
2  
3 development to support labeling claims. Secondary Guidance for industry: patient-reported  
4  
5 outcome measures: use in medical product development to support labeling claims.  
6

7  
8 26. Gowers SG, Harrington RC, Whitton A, et al. (1999). Brief scale for measuring the  
9  
10 outcomes of emotional and behavioural disorders in children. Health of the Nation Outcome  
11  
12 Scales for children and Adolescents (HoNOSCA). Br. J. Psychiatry 174: 413–416.  
13

14  
15 27. Garralda ME, Yates P, Higginson I. (2000). Child and adolescent mental health service use.  
16  
17 HoNOSCA as an outcome measure. Br. J. Psychiatry. 177: 52–58.  
18

19  
20 28. Guy W. In: Handbook of Psychiatric Measures. Rush AJ, editor. Washington, DC:  
21  
22 American Psychiatric Association; 2000. Clinical Global Impressions Scale (CGI) pp. 100–  
23  
24 102  
25

26  
27 29. Schneider LC, Struening EL. (1983). SLOF: a behavioral rating scale for assessing the  
28  
29 mentally ill. Soc. Work Res Abstr. 19(3):9-21.  
30

31  
32 30. Jarman B. (1983) Identification of underprivileged areas. Br. Med. J. (Clin Res Ed). 286:  
33  
34 1705-1709.  
35

36  
37 31. Jarman 'B. (1984) Underprivileged areas: validation and distribution of scores. Br. Med. J.  
38  
39 289: 1587-1592.  
40

41  
42 32. Wild D, Grove A, Martin M, Eremenco S, McElroy S, Verjee-Lorenz A, Erikson P; ISPOR  
43  
44 Task Force for Translation and Cultural Adaptation (2005). Principles of Good Practice for the  
45  
46 Translation and Cultural Adaptation Process for Patient-Reported Outcomes (PRO) Measures:  
47  
48 report of the ISPOR Task Force for Translation and Cultural Adaptation. Value Health. 8: 94-  
49  
50 104.  
51

52  
53 33. Sullivan GM & Feinn R (2012). Using Effect Size-or Why the P Value Is Not Enough.  
54  
55 Journal of Graduate Medical Education, 4(3), 279-282.  
56

57  
58 34. Portney LG, Watkins MP. (2009). Foundations of clinical research: Applications to  
59  
60 practice. 3rd ed. Upper Saddle River, N.J.: Pearson/Prentice Hall.

- 1  
2  
3 35. Yates P, Garralda ME, Higginson I. (1999). Paddington Complexity Scale and Health of  
4 the Nation Outcome Scales for Children and Adolescents. *British Journal of Psychiatry*.  
5  
6 174:417–423  
7  
8  
9  
10 36. Bilenberg N. (2003). Health of the Nation Outcome Scales for Children and Adolescents  
11 (HoNOSCA): Results of a Danish field trial. *European Child and Adolescent Psychiatry*.  
12 2003;12:298–302.  
13  
14  
15  
16 37. Peterson RA. (2000). A meta-analysis of variance accounted for and factor loadings in  
17 exploratory factor analysis. *Marketing Letters*. 11:261-275  
18  
19  
20  
21 38. Schraeder K & Reid G. (2017). Who should transition? Defining a target population of  
22 youth with depression and anxiety that will require adult mental health care. *J Behav. Heal.*  
23 *Serv. Res*, 44: 316-330.  
24  
25  
26  
27 39. Talbot RJ. (1991). Underprivileged areas and health care planning: implications of use of  
28 Jarman indicators of urban deprivation. *BMJ*. 302(6773):383-386.  
29  
30  
31  
32  
33  
34  
35  
36  
37  
38  
39  
40  
41  
42  
43  
44  
45  
46  
47  
48  
49  
50  
51  
52  
53  
54  
55  
56  
57  
58  
59  
60

view only



1  
2  
3 Figure 1: Summary of the main stages, methods and analyses of the TRAM  
4

5  
6 INSERT FIGURE 1 HERE  
7

8 Abbreviations: AD (Adolescent); AMHS (Adolescent Mental Health Services); CAMHS (Child and Adolescent  
9 Mental Health Services); CL (Clinician); PC (Parent/Carer); TRAM (Transition Readiness and Appropriateness  
10 Measure).  
11  
12  
13  
14  
15  
16  
17  
18  
19  
20  
21  
22  
23  
24  
25  
26  
27  
28  
29  
30  
31  
32  
33  
34  
35  
36  
37  
38  
39  
40  
41  
42  
43  
44  
45  
46  
47  
48  
49  
50  
51  
52  
53  
54  
55  
56  
57  
58  
59  
60

For peer review only

Table 1. Test-retest Reliability of the TRAM (n=100)

## (A) Pearson's correlation coefficients

| <b>Sub-Scale</b>           | <b>Adolescent<br/>(AD: n=36)</b> | <b>Parent/Carer<br/>(PC: n=29)</b> | <b>Clinician<br/>(CL: n=35)</b> |
|----------------------------|----------------------------------|------------------------------------|---------------------------------|
| Symptoms                   | 0.928**                          | 0.936**                            | 0.773**                         |
| Overall Disruption         | 0.817**                          | 0.935**                            | 0.942**                         |
| Barriers to Functioning    | 0.813**                          | 0.908**                            | 0.824**                         |
| Risk Factors               | 0.897**                          | 0.864**                            | 0.914**                         |
| Factors Affecting Symptoms | 0.734**                          | 0.679**                            | 0.912**                         |

Key:  $p < 0.01^{**}$

## (B) Mean and Standard deviations

| <b>Sub-Scale</b>                  |                    | <b>Adolescent<br/>(AD: n=36)</b> |         | <b>Parent/Carer<br/>(PC: n=29)</b> |         | <b>Clinician<br/>(CL: n=35)</b> |         |
|-----------------------------------|--------------------|----------------------------------|---------|------------------------------------|---------|---------------------------------|---------|
|                                   |                    | Baseline                         | Re-test | Baseline                           | Re-test | Baseline                        | Re-test |
| <b>Symptoms</b>                   | Mean               | 16.667                           | 14.167  | 12.379                             | 10.466  | 11.629                          | 11.300  |
|                                   | Standard Deviation | 9.789                            | 9.667   | 8.548                              | 8.757   | 5.945                           | 6.253   |
| <b>Overall Disruption</b>         | Mean               | 9.944                            | 8.694   | 8.655                              | 8.379   | 11.086                          | 11.200  |
|                                   | Standard Deviation | 6.697                            | 5.956   | 8.784                              | 8.954   | 7.625                           | 8.554   |
| <b>Barriers to Functioning</b>    | Mean               | 7.472                            | 6.778   | 6.655                              | 6.034   | 7.086                           | 6.314   |
|                                   | Standard Deviation | 3.501                            | 3.743   | 4.685                              | 3.530   | 3.673                           | 3.636   |
| <b>Risk Factors</b>               | Mean               | 6.847                            | 6.167   | 4.621                              | 4.379   | 5.829                           | 6.014   |
|                                   | Standard Deviation | 4.657                            | 4.623   | 4.037                              | 4.212   | 4.711                           | 4.999   |
| <b>Factors Affecting Symptoms</b> | Mean               | 2.167                            | 1.889   | 1.759                              | 1.276   | 2.171                           | 2.029   |
|                                   | Standard Deviation | 1.464                            | 1.348   | 1.596                              | 1.251   | 1.445                           | 1.224   |

Abbreviations: AD (Adolescent); CL (Clinician); PC (Parent/Carer); TRAM (Transition Readiness and Appropriateness Measure).

Table 2. Pearson's product moment correlation coefficients for the TRAM sub-scales with HoNOSCA and CGI-S scales.

| TRAM Sub-Scales   |                |                    |                |                            |                         |
|-------------------|----------------|--------------------|----------------|----------------------------|-------------------------|
| Scales            | Symptom        | Overall Disruption | Risk Factors   | Factors affecting Symptoms | Barriers to functioning |
| <b>HoNOSCA AD</b> | 0.378**(n=914) | 0.345**(n=914)     | 0.370**(n=914) | 0.306**(n=914)             | 0.249**(n=577)          |
| <b>HoNOSCA PC</b> | 0.369**(n=738) | 0.329**(n=738)     | 0.374**(n=738) | 0.349**(n=738)             | 0.151**(n=477)          |
| <b>HoNOSCA CL</b> | 0.478**(n=845) | 0.437**(n=845)     | 0.442**(n=845) | 0.357**(n=845)             | 0.340**(n=502)          |
| <b>CGI-S AD</b>   | 0.242**(n=832) | 0.261**(n=832)     | 0.210**(n=832) | 0.294**(n=832)             | 0.149**(n=527)          |
| <b>CGI-S PC</b>   | 0.319**(n=684) | 0.285**(n=684)     | 0.237**(n=684) | 0.338**(n=684)             | 0.187**(n=444)          |
| <b>CGI-S CL</b>   | 0.548**(n=836) | 0.514**(n=836)     | 0.373**(n=836) | 0.352**(n=182)             | 0.307**(n=499)          |

Abbreviations: AD (Adolescent); CGI-S (Clinical Global Impression Severity); CL (Clinician); HoNOSCA (Health of the Nation Outcome Scale for Children and Adolescents); PC (Parent/Carer); TRAM (Transition Readiness and Appropriateness Measure).

Key:  $p < 0.01^{**}$ ; Null hypothesis is that the Pearson's correlation coefficient equals zero.

Table 3. Summary of Pearson's Correlation of the TRAM sub-scales with SLOF Subscales

| Sub-scale                  | Adolescent           |                      |                             |                      |                  |                  |
|----------------------------|----------------------|----------------------|-----------------------------|----------------------|------------------|------------------|
|                            | Physical Functioning | Personal Care Skills | Interpersonal Relationships | Social Acceptability | Activities       | Work Skills      |
| Symptoms                   | -0.068 (n=732)       | -0.098** (n=732)     | -0.159** (n=732)            | -0.302** (n=732)     | -0.054 (n=732)   | -0.085* (n=732)  |
| Overall disruption         | -0.107** (n=732)     | -0.157** (n=732)     | -0.265** (n=732)            | -0.286** (n=732)     | -0.181** (n=732) | -0.138** (n=732) |
| Risk Factors               | -0.026 (n=732)       | -0.022 (n=732)       | -0.106** (n=732)            | -0.299** (n=732)     | 0.006 (n=732)    | -0.004 (n=732)   |
| Factors Affecting Symptoms | -0.062 (n=732)       | -0.033 (n=732)       | -0.087* (n=732)             | -0.217** (n=732)     | -0.042 (n=732)   | -0.025 (n=732)   |
| Barriers to Functioning    | -0.070 (n=475)       | -0.186** (n=475)     | -0.216** (n=475)            | -0.229** (n=475)     | -0.199** (n=475) | -0.239** (n=475) |

  

| Sub-scale                  | Parent/Carer         |                      |                             |                      |                  |                  |
|----------------------------|----------------------|----------------------|-----------------------------|----------------------|------------------|------------------|
|                            | Physical Functioning | Personal Care Skills | Interpersonal Relationships | Social Acceptability | Activities       | Work Skills      |
| Symptoms                   | -0.180** (n=744)     | -0.275** (n=744)     | -0.411** (n=744)            | -0.569** (n=744)     | -0.306** (n=744) | -0.223** (n=744) |
| Overall disruption         | -0.234** (n=744)     | -0.552** (n=744)     | -0.571** (n=744)            | -0.494** (n=744)     | -0.575** (n=744) | -0.436** (n=744) |
| Risk Factors               | -0.170** (n=744)     | -0.228** (n=744)     | -0.300** (n=744)            | -0.597** (n=744)     | -0.223** (n=744) | -0.125** (n=744) |
| Factors Affecting Symptoms | -0.067 (n=744)       | -0.141** (n=744)     | -0.201** (n=744)            | -0.394** (n=744)     | -0.126** (n=744) | -0.091* (n=744)  |
| Barriers to Functioning    | -0.198** (n=483)     | -0.420** (n=483)     | -0.461** (n=483)            | -0.417** (n=483)     | -0.528** (n=483) | -0.472** (n=483) |

  

| Sub-scale                  | Clinician            |                      |                             |                      |                  |                  |
|----------------------------|----------------------|----------------------|-----------------------------|----------------------|------------------|------------------|
|                            | Physical Functioning | Personal Care Skills | Interpersonal Relationships | Social Acceptability | Activities       | Work Skills      |
| Symptoms                   | -0.087* (n=678)      | -0.155** (n=678)     | -0.211** (n=678)            | -0.242** (n=678)     | -0.138** (n=678) | -0.154** (n=678) |
| Overall disruption         | -0.130** (n=678)     | -0.332** (n=678)     | -0.399** (n=678)            | -0.279** (n=678)     | -0.392** (n=678) | -0.316** (n=678) |
| Risk Factors               | -0.071 (n=678)       | -0.137** (n=678)     | -0.194** (n=678)            | -0.358** (n=678)     | -0.076* (n=678)  | -0.106** (n=678) |
| Factors Affecting Symptoms | 0.012 (n=132)        | -0.068 (n=132)       | -0.084 (n=132)              | -0.253** (n=132)     | -0.046 (n=132)   | -0.100 (n=132)   |
| Barriers to Functioning    | -0.048 (n=414)       | -0.240** (n=414)     | -0.189** (n=414)            | -0.275** (n=414)     | -0.256** (n=414) | -0.322** (n=414) |

Abbreviations: SLOF (Specific Levels of Functioning); TRAM (Transition Readiness and Appropriateness Measure).

Key:  $p < 0.01^{**}$ ,  $p < 0.05^{*}$ ; Null hypothesis is that the Pearson's correlation coefficient equals zero.

Table 4. Summary of EFA for the Adolescent version of the TRAM's sub-scales

| <b>Symptoms Sub-Scale</b>                |                        |                        |
|------------------------------------------|------------------------|------------------------|
|                                          | Factors                |                        |
|                                          | Internalising Symptoms | Externalizing Symptoms |
| <b>Anxiety</b>                           | <b>0.896</b>           | -0.222                 |
| <b>Depression</b>                        | <b>0.794</b>           | 0.020                  |
| <b>Borderline personality</b>            | <b>0.482</b>           | 0.334                  |
| <b>Post-traumatic stress</b>             | <b>0.358</b>           | 0.197                  |
| <b>Social communication difficulties</b> | <b>0.356</b>           | 0.196                  |
| <b>Eating difficulties</b>               | <b>0.313</b>           | 0.086                  |
| <b>Other mental health</b>               | <b>0.186</b>           | 0.107                  |
| <b>Antisocial behaviour</b>              | -0.083                 | <b>0.585</b>           |
| <b>Mania</b>                             | -0.019                 | <b>0.570</b>           |
| <b>Attention deficit</b>                 | 0.139                  | <b>0.380</b>           |
| <b>Psychosis</b>                         | 0.282                  | <b>0.366</b>           |

| <b>Overall disruption Sub-Scale</b>        |               |                            |
|--------------------------------------------|---------------|----------------------------|
|                                            | Factors       |                            |
|                                            | Relationships | Activities of Daily Living |
| <b>Relationships with friends</b>          | <b>0.903</b>  | -0.088                     |
| <b>Relationships with peers/colleagues</b> | <b>0.845</b>  | -0.082                     |
| <b>Social</b>                              | <b>0.550</b>  | 0.199                      |
| <b>Relationships with family</b>           | <b>0.455</b>  | 0.124                      |
| <b>Education work performance</b>          | <b>0.406</b>  | 0.256                      |
| <b>Sleep</b>                               | <b>0.360</b>  | 0.244                      |
| <b>Household chores</b>                    | 0.017         | <b>0.721</b>               |
| <b>Self-care</b>                           | -0.059        | <b>0.708</b>               |
| <b>Responsibility</b>                      | 0.048         | <b>0.678</b>               |
| <b>Community</b>                           | 0.252         | <b>0.432</b>               |

| <b>Barriers to Functioning Sub-Scale</b>      |                 |                |              |
|-----------------------------------------------|-----------------|----------------|--------------|
|                                               | Factors         |                |              |
|                                               | Patient Factors | Family Support | Treatment    |
| <b>Knowledge of accessing service</b>         | <b>0.636</b>    | -0.103         | -0.053       |
| <b>Ability to act as independent</b>          | <b>0.591</b>    | -0.232         | 0.031        |
| <b>Understanding of mental health</b>         | <b>0.496</b>    | 0.055          | -0.061       |
| <b>Adolescent built trusting relationship</b> | <b>0.420</b>    | 0.225          | 0.011        |
| <b>Ability to repeat history</b>              | <b>0.413</b>    | 0.230          | -0.087       |
| <b>Adolescent wants parent carer</b>          | -0.078          | <b>0.691</b>   | -0.100       |
| <b>Presence of support</b>                    | 0.031           | <b>0.527</b>   | 0.141        |
| <b>Taking medication as prescribed</b>        | -0.149          | -0.052         | <b>0.529</b> |
| <b>Motivation to manage condition</b>         | 0.172           | 0.081          | <b>0.496</b> |

| <b>Risk Factors Sub Scale</b>       |               |               |
|-------------------------------------|---------------|---------------|
|                                     | Factors       |               |
|                                     | Internal Risk | External Risk |
| <b>Suicidal thoughts behaviours</b> | <b>0.848</b>  | 0.001         |
| <b>Self-harming behaviours</b>      | <b>0.788</b>  | -0.056        |
| <b>Stress</b>                       | <b>0.397</b>  | 0.130         |
| <b>Risk to others</b>               | -0.073        | <b>0.649</b>  |
| <b>Risk to self</b>                 | 0.145         | <b>0.529</b>  |
| <b>Risk from others</b>             | 0.234         | <b>0.269</b>  |

| <b>Factors Affecting Symptoms Sub-Scale</b> |                           |                        |
|---------------------------------------------|---------------------------|------------------------|
|                                             | Factors                   |                        |
|                                             | Relapse of Illness Factor | Somatic Illness Factor |
| <b>Inpatient hospital stays</b>             | <b>0.594</b>              | -0.088                 |
| <b>Service use in times of crisis</b>       | <b>0.569</b>              | -0.037                 |
| <b>Relapse likelihood</b>                   | <b>0.477</b>              | 0.145                  |
| <b>Ongoing treatment need</b>               | <b>0.365</b>              | 0.146                  |
| <b>Drug alcohol misuse</b>                  | <b>0.363</b>              | -0.110                 |
| <b>Presence of side effects</b>             | -0.041                    | <b>0.461</b>           |
| <b>Medical comorbidity</b>                  | -0.039                    | <b>0.335</b>           |

Abbreviations: EFA (Exploratory Factor Analysis); TRAM (Transition Readiness and Appropriateness Measure).

Table 5. Summary of Deprivation Index Correlations with TRAM Sub-Scales

|                                             |                     | <b>Deprivation Index Correlations</b> |           |           |
|---------------------------------------------|---------------------|---------------------------------------|-----------|-----------|
|                                             |                     | <b>AD</b>                             | <b>PC</b> | <b>CL</b> |
| <b>Symptoms Sub-Scale</b>                   | Pearson Correlation | 0.027                                 | 0.116**   | 0.089*    |
|                                             | Sig. (2-tailed)     | 0.454                                 | 0.002     | 0.017     |
|                                             | N                   | 768                                   | 732       | 719       |
| <b>Risk Factors Sub Scale</b>               | Pearson Correlation | 0.052                                 | 0.175**   | 0.118**   |
|                                             | Sig. (2-tailed)     | 0.148                                 | 0.000     | 0.001     |
|                                             | N                   | 768                                   | 732       | 719       |
| <b>Overall disruption Sub-Scale</b>         | Pearson Correlation | 0.083*                                | 0.162**   | 0.127**   |
|                                             | Sig. (2-tailed)     | 0.021                                 | 0.000     | 0.001     |
|                                             | N                   | 768                                   | 732       | 719       |
| <b>Factors Affecting Symptoms Sub-Scale</b> | Pearson Correlation | 0.031                                 | 0.111**   | 0.085     |
|                                             | Sig. (2-tailed)     | 0.396                                 | 0.003     | 0.298     |
|                                             | N                   | 768                                   | 732       | 151       |
| <b>Barriers to Functioning Sub-Scale</b>    | Pearson Correlation | -0.046                                | 0.061     | -0.019    |
|                                             | Sig. (2-tailed)     | 0.301                                 | 0.181     | 0.699     |
|                                             | N                   | 500                                   | 477       | 435       |

Abbreviations: AD (Adolescent); CL (Clinician); PC (Parent/Carer); TRAM (Transition Readiness and Appropriateness Measure).

Key:  $p < 0.01^{**}$ ,  $p < 0.05^{*}$ ; Null hypothesis is that the Pearson's correlation coefficient equals zero.



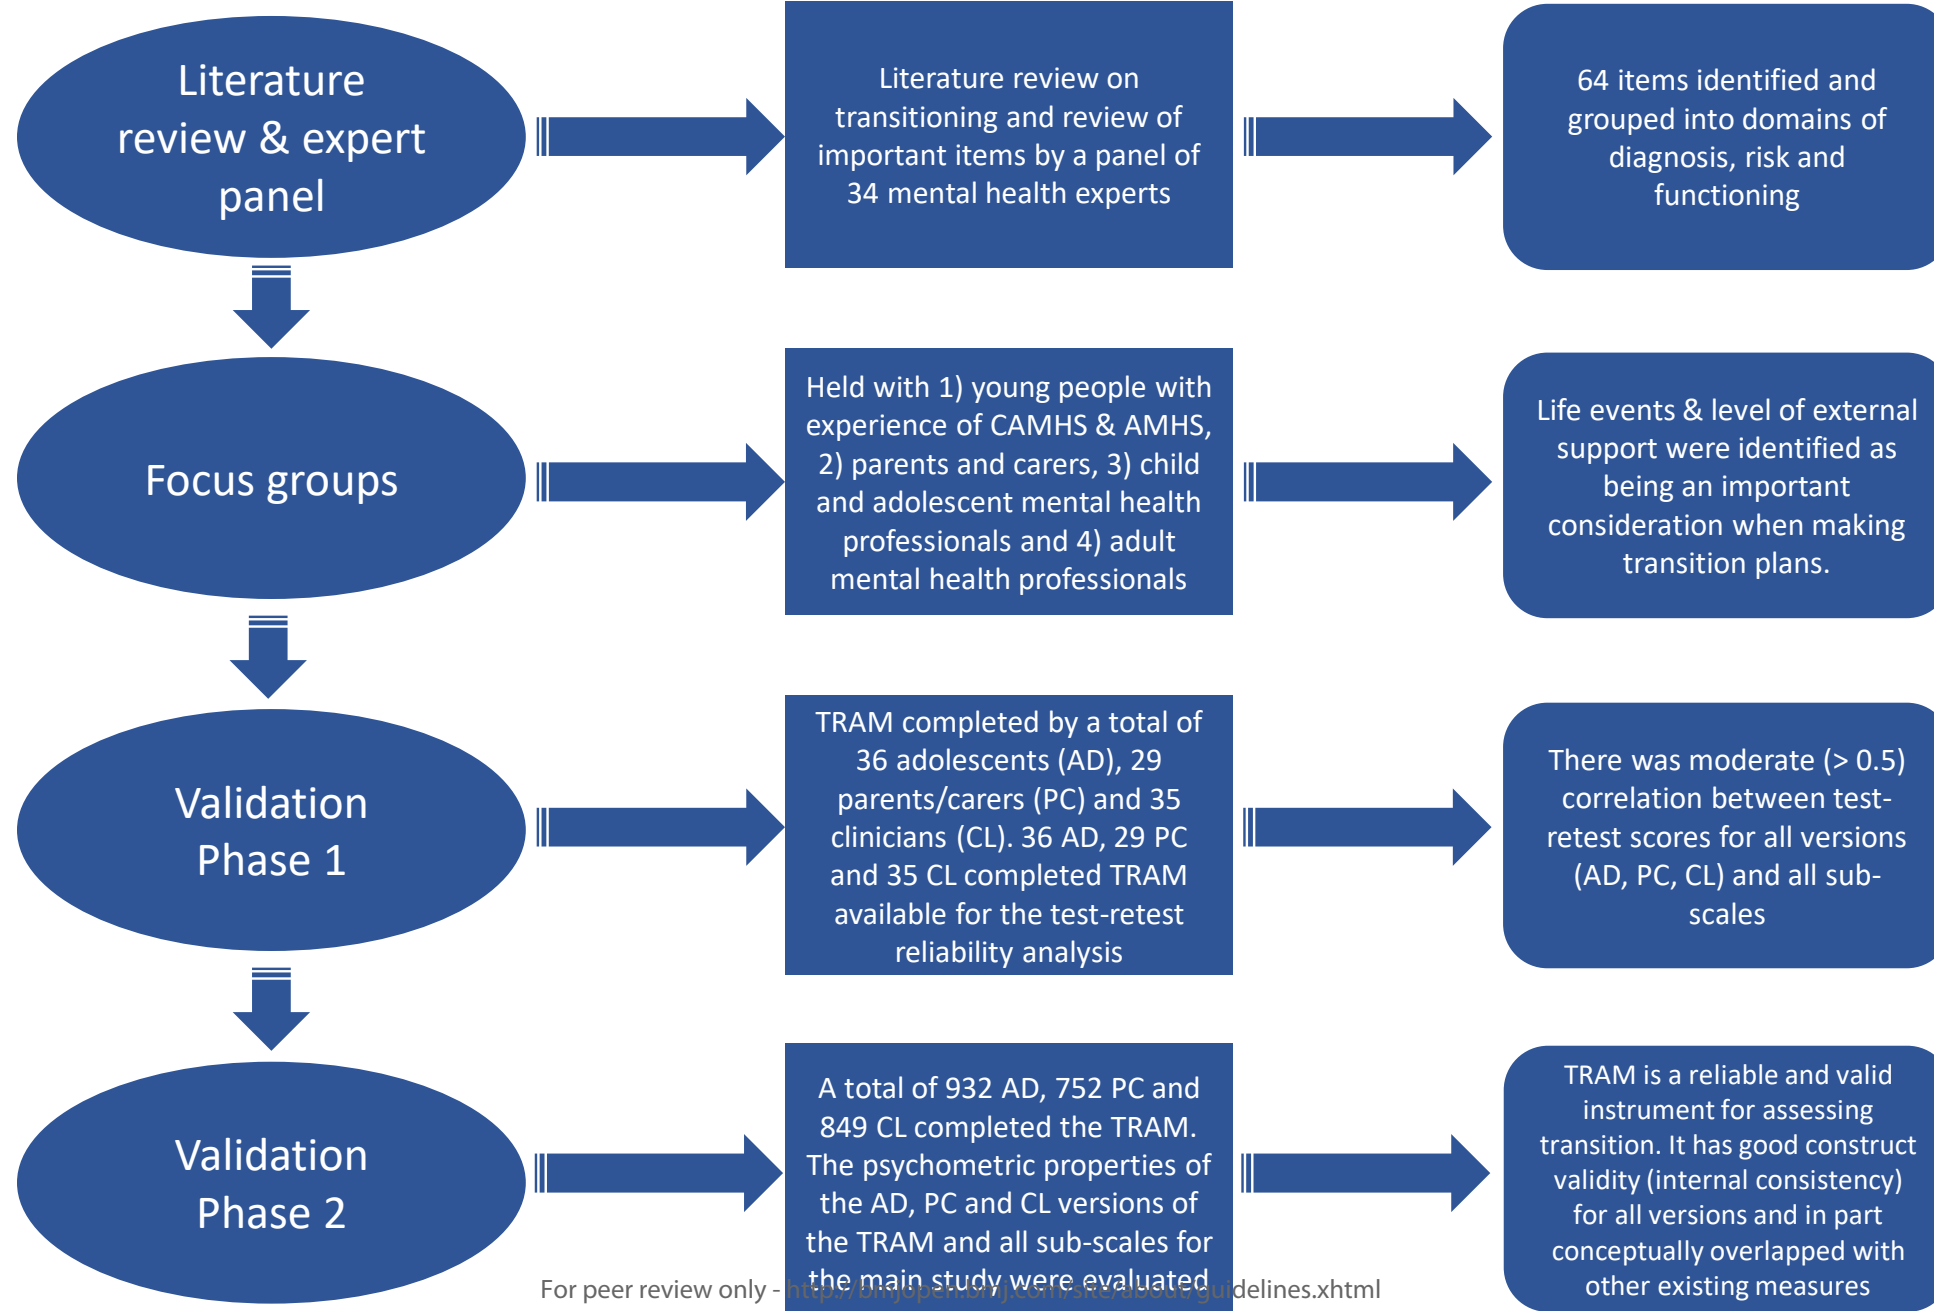

1  
2  
3  
4  
5  
6  
7  
8  
9  
10  
11  
12  
13  
14  
15  
16  
17  
18  
19  
20  
21  
22  
23  
24  
25  
26  
27  
28  
29  
30  
31  
32  
33  
34  
35  
36  
37  
38  
39  
40  
41

## SUPPLEMENTARY INFORMATION

### Supplementary Information Table 1: Details of Ethical Approval

| Country     | Region        | Name of Ethics Committee                                           | Reference           |
|-------------|---------------|--------------------------------------------------------------------|---------------------|
| UK          | London        | NRES Committee London - Camberwell St Giles                        | 14/LO/1049          |
| UK          | West Midlands | NRES Committee West Midlands - South Birmingham                    | 15/WM/0052          |
| Belgium     | Leuven        | Ethics Committee Research UZ / KU Leuven                           | B322201526220       |
| Croatia     | Split         | Clinical Hospital Center Split Ethics Committee                    | 500-03/15-01/01     |
| France      | Montpellier   | The South Mediterranean People Protection Committee                | RCB: 2015-A01029-40 |
| Germany     | Augsburg      | Ethics Committee of the LMU Munich                                 | 479-15              |
| Germany     | Ulm           | Ethics Committee of Ulm University                                 | 214/15              |
| Germany     | Ulm           | Ethics Committee of Ulm University                                 | 22/15               |
| Ireland     | Dublin        | Saint John of God Hospitaller Ministries Research Ethics Committee | ID 604              |
| Ireland     | Dublin        | UCD Office of Research Ethics                                      | LS-E-15-95-Ohara    |
| Italy       | Bari          | Independent Ethics Committee of A.O.U. of Cagliari                 | 4736                |
| Italy       | Bari          | Independent Ethics Committee of A.O.U. of Cagliari                 | 4696                |
| Italy       | Brescia       | Provincial Ethic Committee of Brescia                              | 1967                |
| Italy       | Brescia       | Ethics Committee IRCCS San Giovanni di Dio, Fatebenefratelli       | 60/2015             |
| Italy       | Brescia       | Ethics Committee IRCCS San Giovanni di Dio, Fatebenefratelli       | 19/2015             |
| Italy       | Brescia       | Ethics Committee IRCCS San Giovanni di Dio, Fatebenefratelli       | 70/2014             |
| Italy       | Esine         | Provincial Ethic Committee of Brescia province                     | NP 1987             |
| Italy       | Lecco         | Intercompany Ethics Committee of Lecco, Como, Sondrio provinces    | 157/2015            |
| Italy       | Milan         | Ethics Committee of Milano Area C                                  | 396-062015          |
| Italy       | Milan         | Intercompany Ethics Committee of Milano Area A                     | 17931               |
| Italy       | Modena        | Provincial Ethic Committee                                         | 2932                |
| Italy       | Modena        | Provincial Ethic Committee                                         | 2931                |
| Italy       | Monza         | Ethics Committee of Monza Brianza province                         | MILESTONE           |
| Italy       | Padova        | Ethical Committee for Clinical Trials in the Province of Padova    | 3547/U16/15         |
| Italy       | Padova        | Ethical Committee for Clinical Trials in the Province of Padova    | 3546/U16/15         |
| Italy       | Parma         | Ethics Committee for Parma                                         | 29427               |
| Italy       | Rome          | Ethics Committee                                                   | 338 RA              |
| Italy       | Rome          | Ethics Committee                                                   | 748 LB              |
| Netherlands | Rotterdam     | Erasmus MC Medical Ethics Review Committee                         | MEC-2015-456        |

**Supplementary Information Table 2: Clinical Profile of Patients in whom TRAM was completed**

|                         | <b>Diagnoses of Adolescents who completed TRAM (n=932)</b> | <b>Diagnoses of Adolescents with Parent-completed TRAM (n=752)</b> | <b>Diagnoses of Adolescents with Clinician-completed TRAM (n=849)</b> |
|-------------------------|------------------------------------------------------------|--------------------------------------------------------------------|-----------------------------------------------------------------------|
| Neurodevelopmental      | 340                                                        | 297                                                                | 320                                                                   |
| Personality             | 53                                                         | 35                                                                 | 52                                                                    |
| Eating                  | 69                                                         | 59                                                                 | 66                                                                    |
| Somatic                 | 15                                                         | 9                                                                  | 14                                                                    |
| Dissociative            | -                                                          | 1                                                                  | 1                                                                     |
| Trauma / Stress         | 71                                                         | 48                                                                 | 65                                                                    |
| OCD                     | 32                                                         | 27                                                                 | 31                                                                    |
| Anxiety                 | 150                                                        | 126                                                                | 134                                                                   |
| Depressive              | 225                                                        | 165                                                                | 195                                                                   |
| Schizophrenia           | 28                                                         | 24                                                                 | 25                                                                    |
| Substance Use           | 9                                                          | 5                                                                  | 12                                                                    |
| Other Adult/Unspecified | 34                                                         | 24                                                                 | 21                                                                    |
| Gender Dysphoria        | 8                                                          | 6                                                                  | 6                                                                     |

Notes: The diagnoses were grouped according to the diagnostic categories which were sensitive and relevant in transition making as part of the MILESTONE project. For this reason, the diagnostic categories did not follow the DSM-V or ICD-11 nomenclature and instead patients were grouped according to psychiatric diagnosis that also considered other factors relevant to patient well-being. *As many patients had more than one diagnosis, the total number of diagnoses in each column is larger than the number of patients.*

**Supplementary Information Table 3: Gender, Ethnicity, and Country of Recruitment of Adolescents**

|                                 | <b>Gender of Adolescents who completed TRAM</b>                 | <b>Gender of Adolescents with Parent-completed TRAM</b>                 | <b>Gender of Adolescents with Clinician-completed TRAM</b>                 |
|---------------------------------|-----------------------------------------------------------------|-------------------------------------------------------------------------|----------------------------------------------------------------------------|
| Female                          | 572                                                             | 443                                                                     | 511                                                                        |
| Male                            | 357                                                             | 309                                                                     | 337                                                                        |
| Not Declared or coded           | 3                                                               | -                                                                       | 1                                                                          |
| <b>Total</b>                    | <b>932</b>                                                      | <b>752</b>                                                              | <b>849</b>                                                                 |
|                                 | <b>Ethnicity of Adolescents who completed TRAM</b>              | <b>Ethnicity of Adolescents with Parent-completed TRAM</b>              | <b>Ethnicity of Adolescents with Clinician-completed TRAM</b>              |
| Caucasian                       | 741                                                             | 610                                                                     | 681                                                                        |
| Not Declared or coded           | 101                                                             | 95                                                                      | 99                                                                         |
| European                        | 18                                                              | 12                                                                      | 15                                                                         |
| Hispanic                        | 11                                                              | 7                                                                       | 8                                                                          |
| Other Mixed background          | 10                                                              | 6                                                                       | 8                                                                          |
| Any other Asian background      | 8                                                               | 6                                                                       | 8                                                                          |
| Asian Indian                    | 6                                                               | 3                                                                       | 5                                                                          |
| Black African                   | 6                                                               | 1                                                                       | 5                                                                          |
| Black Caribbean                 | 5                                                               | 1                                                                       | 1                                                                          |
| Mixed White and Asian           | 5                                                               | 3                                                                       | 4                                                                          |
| Mixed White and Black Caribbean | 5                                                               | 3                                                                       | 5                                                                          |
| Mixed White and Black African   | 3                                                               | 2                                                                       | 1                                                                          |
| Other Black background          | 3                                                               | 1                                                                       | 2                                                                          |
| Asian Pakistani                 | 2                                                               | -                                                                       | 2                                                                          |
| Asian Bangladeshi               | 1                                                               | -                                                                       | -                                                                          |
| Dutch with Lebanese Parents     | 1                                                               | -                                                                       | 1                                                                          |
| Gypsy/Traveller                 | 1                                                               | 1                                                                       | 1                                                                          |
| Kurdish                         | 1                                                               | -                                                                       | -                                                                          |
| Latin American                  | 1                                                               | -                                                                       | 1                                                                          |
| Moroccan                        | 1                                                               | -                                                                       | 1                                                                          |
| Polish descent                  | 1                                                               | -                                                                       | 1                                                                          |
| Surinamese                      | 1                                                               | 1                                                                       | -                                                                          |
| <b>Total</b>                    | <b>932</b>                                                      | <b>752</b>                                                              | <b>849</b>                                                                 |
|                                 | <b>Country of Recruitment of Adolescents who completed TRAM</b> | <b>Country of Recruitment of Adolescents with Parent-completed TRAM</b> | <b>Country of Recruitment of Adolescents with Clinician-completed TRAM</b> |
| Italy                           | 217                                                             | 207                                                                     | 212                                                                        |
| Netherlands                     | 152                                                             | 108                                                                     | 139                                                                        |

|              |            |            |            |
|--------------|------------|------------|------------|
| UK West      | 122        | 98         | 99         |
| Belgium      | 95         | 69         | 81         |
| Germany      | 91         | 68         | 97         |
| France       | 85         | 85         | 87         |
| UK London    | 74         | 21         | 41         |
| Croatia      | 52         | 52         | 52         |
| Ireland      | 44         | 44         | 41         |
| <b>Total</b> | <b>932</b> | <b>752</b> | <b>849</b> |

For peer review only
