# Supplementary material for: Validation of the Transition Readiness and Appropriateness Measure (TRAM) for the Managing the Link and Strengthening Transition from Child to Adult Mental Healthcare in Europe (MILESTONE) study
Source: PubMed Central journal article supplement — BMJ Open. 2020 Jun 23;10(6):e033324. doi: 10.1136/bmjopen-2019-033324 (PMC7312331; doi:10.1136/bmjopen-2019-033324), 2020-06-23
Supplement: bmjopen-2019-033324supp001.pdf [file bmjopen-2019-033324supp001.pdf]

## SUPPLEMENTARY INFORMATION

**Supplementary Information Table 1: Details of Ethical Approval**

| Country     | Region        | Name of Ethics Committee                                           | Reference           |
|-------------|---------------|--------------------------------------------------------------------|---------------------|
| UK          | London        | NRES Committee London - Camberwell St Giles                        | 14/LO/1049          |
| UK          | West Midlands | NRES Committee West Midlands - South Birmingham                    | 15/WM/0052          |
| Belgium     | Leuven        | Ethics Committee Research UZ / KU Leuven                           | B322201526220       |
| Croatia     | Split         | Clinical Hospital Center Split Ethics Committee                    | 500-03/15-01/01     |
| France      | Montpellier   | The South Mediterranean People Protection Committee                | RCB: 2015-A01029-40 |
| Germany     | Augsburg      | Ethics Committee of the LMU Munich                                 | 479-15              |
| Germany     | Ulm           | Ethics Committee of Ulm University                                 | 214/15              |
| Germany     | Ulm           | Ethics Committee of Ulm University                                 | 22/15               |
| Ireland     | Dublin        | Saint John of God Hospitaller Ministries Research Ethics Committee | ID 604              |
| Ireland     | Dublin        | UCD Office of Research Ethics                                      | LS-E-15-95-Ohara    |
| Italy       | Bari          | Independent Ethics Committee of A.O.U. of Cagliari                 | 4736                |
| Italy       | Bari          | Independent Ethics Committee of A.O.U. of Cagliari                 | 4696                |
| Italy       | Brescia       | Provincial Ethic Committee of Brescia                              | 1967                |
| Italy       | Brescia       | Ethics Committee IRCCS San Giovanni di Dio, Fatebenefratelli       | 60/2015             |
| Italy       | Brescia       | Ethics Committee IRCCS San Giovanni di Dio, Fatebenefratelli       | 19/2015             |
| Italy       | Brescia       | Ethics Committee IRCCS San Giovanni di Dio, Fatebenefratelli       | 70/2014             |
| Italy       | Esine         | Provincial Ethic Committee of Brescia province                     | NP 1987             |
| Italy       | Lecco         | Intercompany Ethics Committee of Lecco, Como, Sondrio provinces    | 157/2015            |
| Italy       | Milan         | Ethics Committee of Milano Area C                                  | 396-062015          |
| Italy       | Milan         | Intercompany Ethics Committee of Milano Area A                     | 17931               |
| Italy       | Modena        | Provincial Ethic Committee                                         | 2932                |
| Italy       | Modena        | Provincial Ethic Committee                                         | 2931                |
| Italy       | Monza         | Ethics Committee of Monza Brianza province                         | MILESTONE           |
| Italy       | Padova        | Ethical Committee for Clinical Trials in the Province of Padova    | 3547/U16/15         |
| Italy       | Padova        | Ethical Committee for Clinical Trials in the Province of Padova    | 3546/U16/15         |
| Italy       | Parma         | Ethics Committee for Parma                                         | 29427               |
| Italy       | Rome          | Ethics Committee                                                   | 338 RA              |
| Italy       | Rome          | Ethics Committee                                                   | 748 LB              |
| Netherlands | Rotterdam     | Erasmus MC Medical Ethics Review Committee                         | MEC-2015-456        |

**Supplementary Information Table 2: Clinical Profile of Patients in whom TRAM was completed**

|                         | <b>Diagnoses of Adolescents who completed TRAM (n=932)</b> | <b>Diagnoses of Adolescents with Parent-completed TRAM (n=752)</b> | <b>Diagnoses of Adolescents with Clinician-completed TRAM (n=849)</b> |
|-------------------------|------------------------------------------------------------|--------------------------------------------------------------------|-----------------------------------------------------------------------|
| Neurodevelopmental      | 340                                                        | 297                                                                | 320                                                                   |
| Personality             | 53                                                         | 35                                                                 | 52                                                                    |
| Eating                  | 69                                                         | 59                                                                 | 66                                                                    |
| Somatic                 | 15                                                         | 9                                                                  | 14                                                                    |
| Dissociative            | -                                                          | 1                                                                  | 1                                                                     |
| Trauma / Stress         | 71                                                         | 48                                                                 | 65                                                                    |
| OCD                     | 32                                                         | 27                                                                 | 31                                                                    |
| Anxiety                 | 150                                                        | 126                                                                | 134                                                                   |
| Depressive              | 225                                                        | 165                                                                | 195                                                                   |
| Schizophrenia           | 28                                                         | 24                                                                 | 25                                                                    |
| Substance Use           | 9                                                          | 5                                                                  | 12                                                                    |
| Other Adult/Unspecified | 34                                                         | 24                                                                 | 21                                                                    |
| Gender Dysphoria        | 8                                                          | 6                                                                  | 6                                                                     |

Notes: The diagnoses were grouped according to the diagnostic categories which were sensitive and relevant in transition making as part of the MILESTONE project. For this reason, the diagnostic categories did not follow the DSM-V or ICD-11 nomenclature and instead patients were grouped according to psychiatric diagnosis that also considered other factors relevant to patient well-being. *As many patients had more than one diagnosis, the total number of diagnoses in each column is larger than the number of patients.*

**Supplementary Information Table 3: Gender, Ethnicity, and Country of Recruitment of Adolescents**

|                                 | <b>Gender of Adolescents who completed TRAM</b>                 | <b>Gender of Adolescents with Parent-completed TRAM</b>                 | <b>Gender of Adolescents with Clinician-completed TRAM</b>                 |
|---------------------------------|-----------------------------------------------------------------|-------------------------------------------------------------------------|----------------------------------------------------------------------------|
| Female                          | 572                                                             | 443                                                                     | 511                                                                        |
| Male                            | 357                                                             | 309                                                                     | 337                                                                        |
| Not Declared or coded           | 3                                                               | -                                                                       | 1                                                                          |
| <b>Total</b>                    | <b>932</b>                                                      | <b>752</b>                                                              | <b>849</b>                                                                 |
|                                 | <b>Ethnicity of Adolescents who completed TRAM</b>              | <b>Ethnicity of Adolescents with Parent-completed TRAM</b>              | <b>Ethnicity of Adolescents with Clinician-completed TRAM</b>              |
| Caucasian                       | 741                                                             | 610                                                                     | 681                                                                        |
| Not Declared or coded           | 101                                                             | 95                                                                      | 99                                                                         |
| European                        | 18                                                              | 12                                                                      | 15                                                                         |
| Hispanic                        | 11                                                              | 7                                                                       | 8                                                                          |
| Other Mixed background          | 10                                                              | 6                                                                       | 8                                                                          |
| Any other Asian background      | 8                                                               | 6                                                                       | 8                                                                          |
| Asian Indian                    | 6                                                               | 3                                                                       | 5                                                                          |
| Black African                   | 6                                                               | 1                                                                       | 5                                                                          |
| Black Caribbean                 | 5                                                               | 1                                                                       | 1                                                                          |
| Mixed White and Asian           | 5                                                               | 3                                                                       | 4                                                                          |
| Mixed White and Black Caribbean | 5                                                               | 3                                                                       | 5                                                                          |
| Mixed White and Black African   | 3                                                               | 2                                                                       | 1                                                                          |
| Other Black background          | 3                                                               | 1                                                                       | 2                                                                          |
| Asian Pakistani                 | 2                                                               | -                                                                       | 2                                                                          |
| Asian Bangladeshi               | 1                                                               | -                                                                       | -                                                                          |
| Dutch with Lebanese Parents     | 1                                                               | -                                                                       | 1                                                                          |
| Gypsy/Traveller                 | 1                                                               | 1                                                                       | 1                                                                          |
| Kurdish                         | 1                                                               | -                                                                       | -                                                                          |
| Latin American                  | 1                                                               | -                                                                       | 1                                                                          |
| Moroccan                        | 1                                                               | -                                                                       | 1                                                                          |
| Polish descent                  | 1                                                               | -                                                                       | 1                                                                          |
| Surinamese                      | 1                                                               | 1                                                                       | -                                                                          |
| <b>Total</b>                    | <b>932</b>                                                      | <b>752</b>                                                              | <b>849</b>                                                                 |
|                                 | <b>Country of Recruitment of Adolescents who completed TRAM</b> | <b>Country of Recruitment of Adolescents with Parent-completed TRAM</b> | <b>Country of Recruitment of Adolescents with Clinician-completed TRAM</b> |
| Italy                           | 217                                                             | 207                                                                     | 212                                                                        |
| Netherlands                     | 152                                                             | 108                                                                     | 139                                                                        |

|              |            |            |            |
|--------------|------------|------------|------------|
| UK West      | 122        | 98         | 99         |
| Belgium      | 95         | 69         | 81         |
| Germany      | 91         | 68         | 97         |
| France       | 85         | 85         | 87         |
| UK London    | 74         | 21         | 41         |
| Croatia      | 52         | 52         | 52         |
| Ireland      | 44         | 44         | 41         |
| <b>Total</b> | <b>932</b> | <b>752</b> | <b>849</b> |
